# Supplementary material
Source: publisher site journal article supplement (https://www.spandidos-publications.com/8556/downloadSupplementary)
Supplement: Supplementary file 1 [file downloadSupplementary]

## Sheet: Sheet1
Table SIV. A total of 30 candidate genes significantly causally associated with LUAD identified by MR analysis.
No.	id.exposure	id.outcome	Outcome	Exposure	Method	nsnp	b	se	P-value	lo_ci	up_ci	or	or_lci95	or_uci95
1	eqtl-a-ENSG00000165312	Lung adenocarcinoma	Lung adenocarcinoma || id:ieu-a-984	|| id:eqtl-a-ENSG00000165312	MR Egger	3	-0.0313594	0.247211	0.919672	-0.515894	0.453175	0.969127	0.596967	1.5733
2	eqtl-a-ENSG00000165312	Lung adenocarcinoma	Lung adenocarcinoma || id:ieu-a-984	|| id:eqtl-a-ENSG00000165312	Weighted median	3	0.0362536	0.087105	0.67726	-0.134472	0.206979	1.03692	0.874177	1.22996
3	eqtl-a-ENSG00000165312	Lung adenocarcinoma	Lung adenocarcinoma || id:ieu-a-984	|| id:eqtl-a-ENSG00000165312	Inverse variance weighted	3	0.0349242	0.081068	0.666613	-0.123969	0.193818	1.03554	0.883407	1.21387
4	eqtl-a-ENSG00000165312	Lung adenocarcinoma	Lung adenocarcinoma || id:ieu-a-984	|| id:eqtl-a-ENSG00000165312	Simple mode	3	0.06149	0.10205	0.608029	-0.138528	0.261508	1.06342	0.870639	1.29889
5	eqtl-a-ENSG00000165312	Lung adenocarcinoma	Lung adenocarcinoma || id:ieu-a-984	|| id:eqtl-a-ENSG00000165312	Weighted mode	3	0.0481211	0.0976282	0.670883	-0.14323	0.239472	1.0493	0.866555	1.27058
6	eqtl-a-ENSG00000116016	Lung adenocarcinoma	Lung adenocarcinoma || id:ieu-a-984	|| id:eqtl-a-ENSG00000116016	MR Egger	6	-0.0968749	0.269083	0.737037	-0.624278	0.430528	0.90767	0.535648	1.53807
7	eqtl-a-ENSG00000116016	Lung adenocarcinoma	Lung adenocarcinoma || id:ieu-a-984	|| id:eqtl-a-ENSG00000116016	Weighted median	6	0.0214778	0.102975	0.834781	-0.180353	0.223308	1.02171	0.834976	1.25021
8	eqtl-a-ENSG00000116016	Lung adenocarcinoma	Lung adenocarcinoma || id:ieu-a-984	|| id:eqtl-a-ENSG00000116016	Inverse variance weighted	6	-0.0215094	0.0793688	0.786386	-0.177072	0.134053	0.97872	0.837719	1.14345
9	eqtl-a-ENSG00000116016	Lung adenocarcinoma	Lung adenocarcinoma || id:ieu-a-984	|| id:eqtl-a-ENSG00000116016	Simple mode	6	0.0228141	0.145774	0.88176	-0.262904	0.308532	1.02308	0.768816	1.36142
10	eqtl-a-ENSG00000116016	Lung adenocarcinoma	Lung adenocarcinoma || id:ieu-a-984	|| id:eqtl-a-ENSG00000116016	Weighted mode	6	0.0228141	0.135209	0.872621	-0.242196	0.287824	1.02308	0.784903	1.33352
11	eqtl-a-ENSG00000139567	Lung adenocarcinoma	Lung adenocarcinoma || id:ieu-a-984	|| id:eqtl-a-ENSG00000139567	MR Egger	9	-0.0589789	0.0580173	0.343198	-0.172693	0.054735	0.942727	0.841396	1.05626
12	eqtl-a-ENSG00000139567	Lung adenocarcinoma	Lung adenocarcinoma || id:ieu-a-984	|| id:eqtl-a-ENSG00000139567	Weighted median	9	-0.0667027	0.0391223	0.0881979	-0.143382	0.0099769	0.935473	0.866423	1.01003
13	eqtl-a-ENSG00000139567	Lung adenocarcinoma	Lung adenocarcinoma || id:ieu-a-984	|| id:eqtl-a-ENSG00000139567	Inverse variance weighted	9	-0.0752428	0.0349379	0.0312704	-0.143721	-0.00676449	0.927518	0.866129	0.993258
14	eqtl-a-ENSG00000139567	Lung adenocarcinoma	Lung adenocarcinoma || id:ieu-a-984	|| id:eqtl-a-ENSG00000139567	Simple mode	9	-0.10059	0.0619351	0.143004	-0.221983	0.0208024	0.904303	0.800929	1.02102
15	eqtl-a-ENSG00000139567	Lung adenocarcinoma	Lung adenocarcinoma || id:ieu-a-984	|| id:eqtl-a-ENSG00000139567	Weighted mode	9	-0.0662058	0.0389552	0.127642	-0.142558	0.0101463	0.935938	0.867137	1.0102
16	eqtl-a-ENSG00000102760	Lung adenocarcinoma	Lung adenocarcinoma || id:ieu-a-984	|| id:eqtl-a-ENSG00000102760	MR Egger	8	0.0163984	0.0658002	0.811507	-0.11257	0.145367	1.01653	0.893535	1.15646
17	eqtl-a-ENSG00000102760	Lung adenocarcinoma	Lung adenocarcinoma || id:ieu-a-984	|| id:eqtl-a-ENSG00000102760	Weighted median	8	-0.0273045	0.0496533	0.582386	-0.124625	0.070016	0.973065	0.882828	1.07253
18	eqtl-a-ENSG00000102760	Lung adenocarcinoma	Lung adenocarcinoma || id:ieu-a-984	|| id:eqtl-a-ENSG00000102760	Inverse variance weighted	8	-0.00611557	0.0381643	0.872689	-0.0809176	0.0686865	0.993903	0.92227	1.0711
19	eqtl-a-ENSG00000102760	Lung adenocarcinoma	Lung adenocarcinoma || id:ieu-a-984	|| id:eqtl-a-ENSG00000102760	Simple mode	8	-0.0495459	0.0704938	0.504851	-0.187714	0.0886219	0.951661	0.828852	1.09267
20	eqtl-a-ENSG00000102760	Lung adenocarcinoma	Lung adenocarcinoma || id:ieu-a-984	|| id:eqtl-a-ENSG00000102760	Weighted mode	8	-0.0324965	0.0519155	0.551204	-0.134251	0.0692579	0.968026	0.874371	1.07171
21	eqtl-a-ENSG00000120156	Lung adenocarcinoma	Lung adenocarcinoma || id:ieu-a-984	|| id:eqtl-a-ENSG00000120156	MR Egger	20	0.0603558	0.03525	0.10403	-0.00873415	0.129446	1.06221	0.991304	1.1382
22	eqtl-a-ENSG00000120156	Lung adenocarcinoma	Lung adenocarcinoma || id:ieu-a-984	|| id:eqtl-a-ENSG00000120156	Weighted median	20	0.0439128	0.0227387	0.0534596	-0.000655104	0.0884807	1.04489	0.999345	1.09251
23	eqtl-a-ENSG00000120156	Lung adenocarcinoma	Lung adenocarcinoma || id:ieu-a-984	|| id:eqtl-a-ENSG00000120156	Inverse variance weighted	20	0.0412916	0.0172337	0.0165761	0.00751353	0.0750698	1.04216	1.00754	1.07796
24	eqtl-a-ENSG00000120156	Lung adenocarcinoma	Lung adenocarcinoma || id:ieu-a-984	|| id:eqtl-a-ENSG00000120156	Simple mode	20	0.0138303	0.0364721	0.708743	-0.0576551	0.0853157	1.01393	0.943975	1.08906
25	eqtl-a-ENSG00000120156	Lung adenocarcinoma	Lung adenocarcinoma || id:ieu-a-984	|| id:eqtl-a-ENSG00000120156	Weighted mode	20	0.0420011	0.0210681	0.0607536	0.000707611	0.0832945	1.0429	1.00071	1.08686
26	eqtl-a-ENSG00000122679	Lung adenocarcinoma	Lung adenocarcinoma || id:ieu-a-984	|| id:eqtl-a-ENSG00000122679	MR Egger	11	0.0223288	0.0588784	0.713305	-0.0930729	0.13773	1.02258	0.911127	1.14767
27	eqtl-a-ENSG00000122679	Lung adenocarcinoma	Lung adenocarcinoma || id:ieu-a-984	|| id:eqtl-a-ENSG00000122679	Weighted median	11	0.003838	0.0422833	0.927676	-0.0790374	0.0867134	1.00385	0.924005	1.09058
28	eqtl-a-ENSG00000122679	Lung adenocarcinoma	Lung adenocarcinoma || id:ieu-a-984	|| id:eqtl-a-ENSG00000122679	Inverse variance weighted	11	0.014305	0.0353795	0.685969	-0.0550388	0.0836489	1.01441	0.946448	1.08725
29	eqtl-a-ENSG00000122679	Lung adenocarcinoma	Lung adenocarcinoma || id:ieu-a-984	|| id:eqtl-a-ENSG00000122679	Simple mode	11	0.0171103	0.0752981	0.82482	-0.130474	0.164695	1.01726	0.877679	1.17903
30	eqtl-a-ENSG00000122679	Lung adenocarcinoma	Lung adenocarcinoma || id:ieu-a-984	|| id:eqtl-a-ENSG00000122679	Weighted mode	11	0.00264916	0.0418827	0.950812	-0.079441	0.0847393	1.00265	0.923633	1.08843
31	eqtl-a-ENSG00000182010	Lung adenocarcinoma	Lung adenocarcinoma || id:ieu-a-984	|| id:eqtl-a-ENSG00000182010	MR Egger	15	0.0388829	0.031087	0.23306	-0.0220476	0.0998135	1.03965	0.978194	1.10496
32	eqtl-a-ENSG00000182010	Lung adenocarcinoma	Lung adenocarcinoma || id:ieu-a-984	|| id:eqtl-a-ENSG00000182010	Weighted median	15	0.0146203	0.0252104	0.561961	-0.0347921	0.0640327	1.01473	0.965806	1.06613
33	eqtl-a-ENSG00000182010	Lung adenocarcinoma	Lung adenocarcinoma || id:ieu-a-984	|| id:eqtl-a-ENSG00000182010	Inverse variance weighted	15	0.0159096	0.0204607	0.436822	-0.0241933	0.0560125	1.01604	0.976097	1.05761
34	eqtl-a-ENSG00000182010	Lung adenocarcinoma	Lung adenocarcinoma || id:ieu-a-984	|| id:eqtl-a-ENSG00000182010	Simple mode	15	-0.0355936	0.059907	0.561892	-0.153011	0.081824	0.965032	0.85812	1.08526
35	eqtl-a-ENSG00000182010	Lung adenocarcinoma	Lung adenocarcinoma || id:ieu-a-984	|| id:eqtl-a-ENSG00000182010	Weighted mode	15	0.0201403	0.0228284	0.39254	-0.0246034	0.0648839	1.02034	0.975697	1.06704
36	eqtl-a-ENSG00000132622	Lung adenocarcinoma	Lung adenocarcinoma || id:ieu-a-984	|| id:eqtl-a-ENSG00000132622	MR Egger	8	0.0244631	0.118645	0.843463	-0.208082	0.257008	1.02476	0.81214	1.29306
37	eqtl-a-ENSG00000132622	Lung adenocarcinoma	Lung adenocarcinoma || id:ieu-a-984	|| id:eqtl-a-ENSG00000132622	Weighted median	8	0.0814956	0.0581608	0.161151	-0.0324997	0.195491	1.08491	0.968023	1.21591
38	eqtl-a-ENSG00000132622	Lung adenocarcinoma	Lung adenocarcinoma || id:ieu-a-984	|| id:eqtl-a-ENSG00000132622	Inverse variance weighted	8	0.0518758	0.0580854	0.371805	-0.0619715	0.165723	1.05324	0.93991	1.18025
39	eqtl-a-ENSG00000132622	Lung adenocarcinoma	Lung adenocarcinoma || id:ieu-a-984	|| id:eqtl-a-ENSG00000132622	Simple mode	8	0.129858	0.131151	0.355089	-0.127198	0.386915	1.13867	0.880559	1.47243
40	eqtl-a-ENSG00000132622	Lung adenocarcinoma	Lung adenocarcinoma || id:ieu-a-984	|| id:eqtl-a-ENSG00000132622	Weighted mode	8	0.0927438	0.0622142	0.179657	-0.029196	0.214684	1.09718	0.971226	1.23947
41	eqtl-a-ENSG00000151718	Lung adenocarcinoma	Lung adenocarcinoma || id:ieu-a-984	|| id:eqtl-a-ENSG00000151718	MR Egger	11	-1.14855	0.273796	0.00232415	-1.68519	-0.611908	0.317097	0.18541	0.542315
42	eqtl-a-ENSG00000151718	Lung adenocarcinoma	Lung adenocarcinoma || id:ieu-a-984	|| id:eqtl-a-ENSG00000151718	Weighted median	11	-0.310613	0.0769823	5.46332e-05	-0.461498	-0.159728	0.732997	0.630338	0.852376
43	eqtl-a-ENSG00000151718	Lung adenocarcinoma	Lung adenocarcinoma || id:ieu-a-984	|| id:eqtl-a-ENSG00000151718	Inverse variance weighted	11	-0.155467	0.0845588	0.0659786	-0.321202	0.0102681	0.856015	0.725277	1.01032
44	eqtl-a-ENSG00000151718	Lung adenocarcinoma	Lung adenocarcinoma || id:ieu-a-984	|| id:eqtl-a-ENSG00000151718	Simple mode	11	-0.173398	0.168353	0.327292	-0.50337	0.156573	0.840803	0.60449	1.1695
45	eqtl-a-ENSG00000151718	Lung adenocarcinoma	Lung adenocarcinoma || id:ieu-a-984	|| id:eqtl-a-ENSG00000151718	Weighted mode	11	-0.298981	0.0772692	0.00311249	-0.450429	-0.147533	0.741573	0.637355	0.862834
46	eqtl-a-ENSG00000169744	Lung adenocarcinoma	Lung adenocarcinoma || id:ieu-a-984	|| id:eqtl-a-ENSG00000169744	MR Egger	6	-0.203841	0.228516	0.422793	-0.651733	0.24405	0.815592	0.521142	1.27641
47	eqtl-a-ENSG00000169744	Lung adenocarcinoma	Lung adenocarcinoma || id:ieu-a-984	|| id:eqtl-a-ENSG00000169744	Weighted median	6	0.0328216	0.0736888	0.656024	-0.111608	0.177252	1.03337	0.894394	1.19393
48	eqtl-a-ENSG00000169744	Lung adenocarcinoma	Lung adenocarcinoma || id:ieu-a-984	|| id:eqtl-a-ENSG00000169744	Inverse variance weighted	6	0.0439999	0.061542	0.474635	-0.0766224	0.164622	1.04498	0.92624	1.17895
49	eqtl-a-ENSG00000169744	Lung adenocarcinoma	Lung adenocarcinoma || id:ieu-a-984	|| id:eqtl-a-ENSG00000169744	Simple mode	6	0.0385543	0.10732	0.734085	-0.171794	0.248902	1.03931	0.842153	1.28262
50	eqtl-a-ENSG00000169744	Lung adenocarcinoma	Lung adenocarcinoma || id:ieu-a-984	|| id:eqtl-a-ENSG00000169744	Weighted mode	6	0.00759566	0.0839259	0.9314	-0.156899	0.17209	1.00762	0.85479	1.18779
51	eqtl-a-ENSG00000072163	Lung adenocarcinoma	Lung adenocarcinoma || id:ieu-a-984	|| id:eqtl-a-ENSG00000072163	MR Egger	13	0.0712996	0.0719712	0.343139	-0.069764	0.212363	1.0739	0.932614	1.2366
52	eqtl-a-ENSG00000072163	Lung adenocarcinoma	Lung adenocarcinoma || id:ieu-a-984	|| id:eqtl-a-ENSG00000072163	Weighted median	13	0.0679915	0.0390533	0.0816848	-0.00855295	0.144536	1.07036	0.991484	1.1555
53	eqtl-a-ENSG00000072163	Lung adenocarcinoma	Lung adenocarcinoma || id:ieu-a-984	|| id:eqtl-a-ENSG00000072163	Inverse variance weighted	13	0.0475649	0.0311823	0.127164	-0.0135524	0.108682	1.04871	0.986539	1.11481
54	eqtl-a-ENSG00000072163	Lung adenocarcinoma	Lung adenocarcinoma || id:ieu-a-984	|| id:eqtl-a-ENSG00000072163	Simple mode	13	0.0714212	0.0626066	0.276212	-0.0512878	0.19413	1.07403	0.950005	1.21425
55	eqtl-a-ENSG00000072163	Lung adenocarcinoma	Lung adenocarcinoma || id:ieu-a-984	|| id:eqtl-a-ENSG00000072163	Weighted mode	13	0.0698332	0.0393563	0.10135	-0.00730523	0.146972	1.07233	0.992721	1.15832
56	eqtl-a-ENSG00000105227	Lung adenocarcinoma	Lung adenocarcinoma || id:ieu-a-984	|| id:eqtl-a-ENSG00000105227	MR Egger	15	0.140438	0.0985908	0.177876	-0.0527999	0.333676	1.15078	0.94857	1.39609
57	eqtl-a-ENSG00000105227	Lung adenocarcinoma	Lung adenocarcinoma || id:ieu-a-984	|| id:eqtl-a-ENSG00000105227	Weighted median	15	0.112449	0.0416362	0.00691823	0.0308422	0.194056	1.11902	1.03132	1.21416
58	eqtl-a-ENSG00000105227	Lung adenocarcinoma	Lung adenocarcinoma || id:ieu-a-984	|| id:eqtl-a-ENSG00000105227	Inverse variance weighted	15	0.123834	0.0404548	0.00220572	0.0445422	0.203125	1.13183	1.04555	1.22523
59	eqtl-a-ENSG00000105227	Lung adenocarcinoma	Lung adenocarcinoma || id:ieu-a-984	|| id:eqtl-a-ENSG00000105227	Simple mode	15	0.118677	0.0794795	0.157583	-0.0371032	0.274456	1.12601	0.963577	1.31582
60	eqtl-a-ENSG00000105227	Lung adenocarcinoma	Lung adenocarcinoma || id:ieu-a-984	|| id:eqtl-a-ENSG00000105227	Weighted mode	15	0.115067	0.0380526	0.00910943	0.0404842	0.18965	1.12195	1.04131	1.20883
61	eqtl-a-ENSG00000154721	Lung adenocarcinoma	Lung adenocarcinoma || id:ieu-a-984	|| id:eqtl-a-ENSG00000154721	MR Egger	6	-0.267096	0.340374	0.47649	-0.93423	0.400038	0.765599	0.392888	1.49188
62	eqtl-a-ENSG00000154721	Lung adenocarcinoma	Lung adenocarcinoma || id:ieu-a-984	|| id:eqtl-a-ENSG00000154721	Weighted median	6	0.105803	0.0845979	0.211061	-0.0600092	0.271615	1.1116	0.941756	1.31208
63	eqtl-a-ENSG00000154721	Lung adenocarcinoma	Lung adenocarcinoma || id:ieu-a-984	|| id:eqtl-a-ENSG00000154721	Inverse variance weighted	6	0.0865614	0.0693574	0.212013	-0.0493791	0.222502	1.09042	0.95182	1.2492
64	eqtl-a-ENSG00000154721	Lung adenocarcinoma	Lung adenocarcinoma || id:ieu-a-984	|| id:eqtl-a-ENSG00000154721	Simple mode	6	0.032149	0.120141	0.7997	-0.203328	0.267626	1.03267	0.816011	1.30686
65	eqtl-a-ENSG00000154721	Lung adenocarcinoma	Lung adenocarcinoma || id:ieu-a-984	|| id:eqtl-a-ENSG00000154721	Weighted mode	6	0.107407	0.0945177	0.307315	-0.0778478	0.292662	1.11339	0.925105	1.33999
66	eqtl-a-ENSG00000134256	Lung adenocarcinoma	Lung adenocarcinoma || id:ieu-a-984	|| id:eqtl-a-ENSG00000134256	MR Egger	21	-0.0257182	0.0668234	0.70461	-0.156692	0.105256	0.97461	0.854967	1.11099
67	eqtl-a-ENSG00000134256	Lung adenocarcinoma	Lung adenocarcinoma || id:ieu-a-984	|| id:eqtl-a-ENSG00000134256	Weighted median	21	-0.0272089	0.0446146	0.541951	-0.114654	0.0602357	0.973158	0.891675	1.06209
68	eqtl-a-ENSG00000134256	Lung adenocarcinoma	Lung adenocarcinoma || id:ieu-a-984	|| id:eqtl-a-ENSG00000134256	Inverse variance weighted	21	-0.0639283	0.0369562	0.0836586	-0.136362	0.00850578	0.938072	0.872526	1.00854
69	eqtl-a-ENSG00000134256	Lung adenocarcinoma	Lung adenocarcinoma || id:ieu-a-984	|| id:eqtl-a-ENSG00000134256	Simple mode	21	-0.105428	0.0745172	0.172504	-0.251482	0.0406257	0.899939	0.777648	1.04146
70	eqtl-a-ENSG00000134256	Lung adenocarcinoma	Lung adenocarcinoma || id:ieu-a-984	|| id:eqtl-a-ENSG00000134256	Weighted mode	21	-0.0624268	0.0421933	0.154575	-0.145126	0.020272	0.939482	0.864914	1.02048
71	eqtl-a-ENSG00000095370	Lung adenocarcinoma	Lung adenocarcinoma || id:ieu-a-984	|| id:eqtl-a-ENSG00000095370	MR Egger	8	-0.121474	0.118598	0.345227	-0.353927	0.110978	0.885614	0.701927	1.11737
72	eqtl-a-ENSG00000095370	Lung adenocarcinoma	Lung adenocarcinoma || id:ieu-a-984	|| id:eqtl-a-ENSG00000095370	Weighted median	8	-0.0173187	0.0647106	0.788982	-0.144152	0.109514	0.98283	0.865757	1.11574
73	eqtl-a-ENSG00000095370	Lung adenocarcinoma	Lung adenocarcinoma || id:ieu-a-984	|| id:eqtl-a-ENSG00000095370	Inverse variance weighted	8	-0.036869	0.0527426	0.48453	-0.140245	0.0665066	0.963802	0.869146	1.06877
74	eqtl-a-ENSG00000095370	Lung adenocarcinoma	Lung adenocarcinoma || id:ieu-a-984	|| id:eqtl-a-ENSG00000095370	Simple mode	8	-0.0117375	0.0905385	0.900497	-0.189193	0.165718	0.988331	0.827627	1.18024
75	eqtl-a-ENSG00000095370	Lung adenocarcinoma	Lung adenocarcinoma || id:ieu-a-984	|| id:eqtl-a-ENSG00000095370	Weighted mode	8	-0.0086004	0.0829913	0.920369	-0.171263	0.154063	0.991436	0.8426	1.16656
76	eqtl-a-ENSG00000166265	Lung adenocarcinoma	Lung adenocarcinoma || id:ieu-a-984	|| id:eqtl-a-ENSG00000166265	MR Egger	4	-0.0133613	0.110882	0.915101	-0.230691	0.203968	0.986728	0.793985	1.22626
77	eqtl-a-ENSG00000166265	Lung adenocarcinoma	Lung adenocarcinoma || id:ieu-a-984	|| id:eqtl-a-ENSG00000166265	Weighted median	4	0.0372357	0.0420806	0.376229	-0.0452423	0.119714	1.03794	0.955766	1.12717
78	eqtl-a-ENSG00000166265	Lung adenocarcinoma	Lung adenocarcinoma || id:ieu-a-984	|| id:eqtl-a-ENSG00000166265	Inverse variance weighted	4	0.0353694	0.0415484	0.394613	-0.0460655	0.116804	1.036	0.954979	1.1239
79	eqtl-a-ENSG00000166265	Lung adenocarcinoma	Lung adenocarcinoma || id:ieu-a-984	|| id:eqtl-a-ENSG00000166265	Simple mode	4	0.0541142	0.091326	0.595185	-0.124885	0.233113	1.05561	0.882599	1.26252
80	eqtl-a-ENSG00000166265	Lung adenocarcinoma	Lung adenocarcinoma || id:ieu-a-984	|| id:eqtl-a-ENSG00000166265	Weighted mode	4	0.0375619	0.0427942	0.444705	-0.0463146	0.121438	1.03828	0.954742	1.12912
81	eqtl-a-ENSG00000186994	Lung adenocarcinoma	Lung adenocarcinoma || id:ieu-a-984	|| id:eqtl-a-ENSG00000186994	MR Egger	3	-0.0453866	0.167534	0.831576	-0.373754	0.28298	0.955628	0.688146	1.32708
82	eqtl-a-ENSG00000186994	Lung adenocarcinoma	Lung adenocarcinoma || id:ieu-a-984	|| id:eqtl-a-ENSG00000186994	Weighted median	3	-0.0488332	0.0858474	0.569466	-0.217094	0.119428	0.95234	0.804854	1.12685
83	eqtl-a-ENSG00000186994	Lung adenocarcinoma	Lung adenocarcinoma || id:ieu-a-984	|| id:eqtl-a-ENSG00000186994	Inverse variance weighted	3	-0.0294199	0.0810797	0.716716	-0.188336	0.129496	0.971009	0.828336	1.13825
84	eqtl-a-ENSG00000186994	Lung adenocarcinoma	Lung adenocarcinoma || id:ieu-a-984	|| id:eqtl-a-ENSG00000186994	Simple mode	3	-0.0954526	0.119873	0.509372	-0.330404	0.139499	0.908961	0.718633	1.1497
85	eqtl-a-ENSG00000186994	Lung adenocarcinoma	Lung adenocarcinoma || id:ieu-a-984	|| id:eqtl-a-ENSG00000186994	Weighted mode	3	-0.0655036	0.0951201	0.562203	-0.251939	0.120932	0.936596	0.777292	1.12855
86	eqtl-a-ENSG00000064989	Lung adenocarcinoma	Lung adenocarcinoma || id:ieu-a-984	|| id:eqtl-a-ENSG00000064989	MR Egger	12	-0.122825	0.0766304	0.140055	-0.273021	0.0273702	0.884418	0.761077	1.02775
87	eqtl-a-ENSG00000064989	Lung adenocarcinoma	Lung adenocarcinoma || id:ieu-a-984	|| id:eqtl-a-ENSG00000064989	Weighted median	12	-0.105065	0.0329398	0.00142463	-0.169627	-0.0405032	0.900266	0.843979	0.960306
88	eqtl-a-ENSG00000064989	Lung adenocarcinoma	Lung adenocarcinoma || id:ieu-a-984	|| id:eqtl-a-ENSG00000064989	Inverse variance weighted	12	-0.0897624	0.0270278	0.00089657	-0.142737	-0.036788	0.914148	0.866982	0.96388
89	eqtl-a-ENSG00000064989	Lung adenocarcinoma	Lung adenocarcinoma || id:ieu-a-984	|| id:eqtl-a-ENSG00000064989	Simple mode	12	-0.108214	0.0461899	0.0389794	-0.198746	-0.0176814	0.897436	0.819758	0.982474
90	eqtl-a-ENSG00000064989	Lung adenocarcinoma	Lung adenocarcinoma || id:ieu-a-984	|| id:eqtl-a-ENSG00000064989	Weighted mode	12	-0.106149	0.0373987	0.0161305	-0.179451	-0.0328478	0.89929	0.835729	0.967686
91	eqtl-a-ENSG00000171115	Lung adenocarcinoma	Lung adenocarcinoma || id:ieu-a-984	|| id:eqtl-a-ENSG00000171115	MR Egger	9	0.0359853	0.211172	0.86951	-0.377912	0.449882	1.03664	0.685291	1.56813
92	eqtl-a-ENSG00000171115	Lung adenocarcinoma	Lung adenocarcinoma || id:ieu-a-984	|| id:eqtl-a-ENSG00000171115	Weighted median	9	-0.0406852	0.0595493	0.494469	-0.157402	0.0760315	0.960131	0.854361	1.079
93	eqtl-a-ENSG00000171115	Lung adenocarcinoma	Lung adenocarcinoma || id:ieu-a-984	|| id:eqtl-a-ENSG00000171115	Inverse variance weighted	9	-0.0368625	0.0443279	0.405642	-0.123745	0.0500202	0.963809	0.883605	1.05129
94	eqtl-a-ENSG00000171115	Lung adenocarcinoma	Lung adenocarcinoma || id:ieu-a-984	|| id:eqtl-a-ENSG00000171115	Simple mode	9	0.0772304	0.101271	0.467583	-0.121261	0.275722	1.08029	0.885803	1.31748
95	eqtl-a-ENSG00000171115	Lung adenocarcinoma	Lung adenocarcinoma || id:ieu-a-984	|| id:eqtl-a-ENSG00000171115	Weighted mode	9	-0.016975	0.0642888	0.798421	-0.142981	0.109031	0.983168	0.86677	1.1152
96	eqtl-a-ENSG00000107742	Lung adenocarcinoma	Lung adenocarcinoma || id:ieu-a-984	|| id:eqtl-a-ENSG00000107742	MR Egger	11	-0.0672444	0.111392	0.560967	-0.285574	0.151085	0.934967	0.751583	1.1631
97	eqtl-a-ENSG00000107742	Lung adenocarcinoma	Lung adenocarcinoma || id:ieu-a-984	|| id:eqtl-a-ENSG00000107742	Weighted median	11	0.0110536	0.0469613	0.813917	-0.0809907	0.103098	1.01111	0.922202	1.1086
98	eqtl-a-ENSG00000107742	Lung adenocarcinoma	Lung adenocarcinoma || id:ieu-a-984	|| id:eqtl-a-ENSG00000107742	Inverse variance weighted	11	0.0380028	0.0359049	0.289859	-0.0323707	0.108376	1.03873	0.968148	1.11447
99	eqtl-a-ENSG00000107742	Lung adenocarcinoma	Lung adenocarcinoma || id:ieu-a-984	|| id:eqtl-a-ENSG00000107742	Simple mode	11	0.119397	0.0781339	0.157476	-0.0337451	0.27254	1.12682	0.966818	1.3133
100	eqtl-a-ENSG00000107742	Lung adenocarcinoma	Lung adenocarcinoma || id:ieu-a-984	|| id:eqtl-a-ENSG00000107742	Weighted mode	11	0.0299781	0.0487799	0.552572	-0.0656305	0.125587	1.03043	0.936477	1.13381
101	eqtl-a-ENSG00000150048	Lung adenocarcinoma	Lung adenocarcinoma || id:ieu-a-984	|| id:eqtl-a-ENSG00000150048	MR Egger	5	0.037904	0.0827538	0.678068	-0.124293	0.200101	1.03863	0.883121	1.22153
102	eqtl-a-ENSG00000150048	Lung adenocarcinoma	Lung adenocarcinoma || id:ieu-a-984	|| id:eqtl-a-ENSG00000150048	Weighted median	5	-0.0552295	0.044815	0.217805	-0.143067	0.032608	0.946268	0.866696	1.03315
103	eqtl-a-ENSG00000150048	Lung adenocarcinoma	Lung adenocarcinoma || id:ieu-a-984	|| id:eqtl-a-ENSG00000150048	Inverse variance weighted	5	-0.0709888	0.0650177	0.274904	-0.198424	0.0564459	0.931472	0.820022	1.05807
104	eqtl-a-ENSG00000150048	Lung adenocarcinoma	Lung adenocarcinoma || id:ieu-a-984	|| id:eqtl-a-ENSG00000150048	Simple mode	5	-0.115959	0.09668	0.296557	-0.305451	0.073534	0.890512	0.736791	1.07631
105	eqtl-a-ENSG00000150048	Lung adenocarcinoma	Lung adenocarcinoma || id:ieu-a-984	|| id:eqtl-a-ENSG00000150048	Weighted mode	5	-0.0582415	0.0445895	0.261541	-0.145637	0.029154	0.943422	0.864471	1.02958
106	eqtl-a-ENSG00000162367	Lung adenocarcinoma	Lung adenocarcinoma || id:ieu-a-984	|| id:eqtl-a-ENSG00000162367	MR Egger	4	-0.136052	0.167442	0.501825	-0.464237	0.192134	0.872798	0.628614	1.21183
107	eqtl-a-ENSG00000162367	Lung adenocarcinoma	Lung adenocarcinoma || id:ieu-a-984	|| id:eqtl-a-ENSG00000162367	Weighted median	4	-0.032569	0.0609611	0.593162	-0.152053	0.0869147	0.967956	0.858943	1.0908
108	eqtl-a-ENSG00000162367	Lung adenocarcinoma	Lung adenocarcinoma || id:ieu-a-984	|| id:eqtl-a-ENSG00000162367	Inverse variance weighted	4	-0.0216553	0.0521672	0.678058	-0.123903	0.0805923	0.978577	0.883466	1.08393
109	eqtl-a-ENSG00000162367	Lung adenocarcinoma	Lung adenocarcinoma || id:ieu-a-984	|| id:eqtl-a-ENSG00000162367	Simple mode	4	0.0401051	0.0854306	0.670763	-0.127339	0.207549	1.04092	0.880435	1.23066
110	eqtl-a-ENSG00000162367	Lung adenocarcinoma	Lung adenocarcinoma || id:ieu-a-984	|| id:eqtl-a-ENSG00000162367	Weighted mode	4	-0.041714	0.0689291	0.587776	-0.176815	0.0933871	0.959144	0.837935	1.09789
111	eqtl-a-ENSG00000198873	Lung adenocarcinoma	Lung adenocarcinoma || id:ieu-a-984	|| id:eqtl-a-ENSG00000198873	MR Egger	9	0.0513455	0.143641	0.731284	-0.230191	0.332882	1.05269	0.794382	1.39498
112	eqtl-a-ENSG00000198873	Lung adenocarcinoma	Lung adenocarcinoma || id:ieu-a-984	|| id:eqtl-a-ENSG00000198873	Weighted median	9	-0.00621461	0.0673492	0.92648	-0.138219	0.12579	0.993805	0.870908	1.13404
113	eqtl-a-ENSG00000198873	Lung adenocarcinoma	Lung adenocarcinoma || id:ieu-a-984	|| id:eqtl-a-ENSG00000198873	Inverse variance weighted	9	-0.0361624	0.0577417	0.531132	-0.149336	0.0770114	0.964484	0.861279	1.08005
114	eqtl-a-ENSG00000198873	Lung adenocarcinoma	Lung adenocarcinoma || id:ieu-a-984	|| id:eqtl-a-ENSG00000198873	Simple mode	9	0.0292816	0.115797	0.806746	-0.197681	0.256244	1.02971	0.820631	1.29207
115	eqtl-a-ENSG00000198873	Lung adenocarcinoma	Lung adenocarcinoma || id:ieu-a-984	|| id:eqtl-a-ENSG00000198873	Weighted mode	9	-0.00820659	0.082971	0.923644	-0.17083	0.154417	0.991827	0.842965	1.16698
116	eqtl-a-ENSG00000189129	Lung adenocarcinoma	Lung adenocarcinoma || id:ieu-a-984	|| id:eqtl-a-ENSG00000189129	MR Egger	12	-0.122081	0.0893025	0.201553	-0.297114	0.0529523	0.885077	0.74296	1.05438
117	eqtl-a-ENSG00000189129	Lung adenocarcinoma	Lung adenocarcinoma || id:ieu-a-984	|| id:eqtl-a-ENSG00000189129	Weighted median	12	-0.132441	0.037525	0.000416491	-0.20599	-0.058892	0.875955	0.813841	0.942809
118	eqtl-a-ENSG00000189129	Lung adenocarcinoma	Lung adenocarcinoma || id:ieu-a-984	|| id:eqtl-a-ENSG00000189129	Inverse variance weighted	12	-0.10405	0.0377947	0.00590449	-0.178128	-0.0299727	0.90118	0.836835	0.970472
119	eqtl-a-ENSG00000189129	Lung adenocarcinoma	Lung adenocarcinoma || id:ieu-a-984	|| id:eqtl-a-ENSG00000189129	Simple mode	12	-0.163893	0.0532859	0.0105516	-0.268333	-0.0594521	0.848833	0.764653	0.942281
120	eqtl-a-ENSG00000189129	Lung adenocarcinoma	Lung adenocarcinoma || id:ieu-a-984	|| id:eqtl-a-ENSG00000189129	Weighted mode	12	-0.14765	0.0484135	0.0110519	-0.242541	-0.05276	0.862733	0.784632	0.948608
121	eqtl-a-ENSG00000137507	Lung adenocarcinoma	Lung adenocarcinoma || id:ieu-a-984	|| id:eqtl-a-ENSG00000137507	MR Egger	3	0.0877704	0.28542	0.810074	-0.471652	0.647193	1.09174	0.623971	1.91017
122	eqtl-a-ENSG00000137507	Lung adenocarcinoma	Lung adenocarcinoma || id:ieu-a-984	|| id:eqtl-a-ENSG00000137507	Weighted median	3	-0.324445	0.108102	0.00268843	-0.536324	-0.112565	0.722929	0.584894	0.893539
123	eqtl-a-ENSG00000137507	Lung adenocarcinoma	Lung adenocarcinoma || id:ieu-a-984	|| id:eqtl-a-ENSG00000137507	Inverse variance weighted	3	-0.352437	0.114773	0.00213526	-0.577392	-0.127483	0.702973	0.561361	0.880308
124	eqtl-a-ENSG00000137507	Lung adenocarcinoma	Lung adenocarcinoma || id:ieu-a-984	|| id:eqtl-a-ENSG00000137507	Simple mode	3	-0.447332	0.198499	0.152971	-0.83639	-0.0582743	0.639331	0.433272	0.943391
125	eqtl-a-ENSG00000137507	Lung adenocarcinoma	Lung adenocarcinoma || id:ieu-a-984	|| id:eqtl-a-ENSG00000137507	Weighted mode	3	-0.261833	0.12182	0.164613	-0.5006	-0.0230668	0.769639	0.606167	0.977197
126	eqtl-a-ENSG00000204305	Lung adenocarcinoma	Lung adenocarcinoma || id:ieu-a-984	|| id:eqtl-a-ENSG00000204305	MR Egger	6	-0.0885822	0.226304	0.715436	-0.532137	0.354973	0.915228	0.587348	1.42614
127	eqtl-a-ENSG00000204305	Lung adenocarcinoma	Lung adenocarcinoma || id:ieu-a-984	|| id:eqtl-a-ENSG00000204305	Weighted median	6	0.0464516	0.090489	0.607714	-0.130907	0.22381	1.04755	0.8773	1.25083
128	eqtl-a-ENSG00000204305	Lung adenocarcinoma	Lung adenocarcinoma || id:ieu-a-984	|| id:eqtl-a-ENSG00000204305	Inverse variance weighted	6	0.0898579	0.0887935	0.311544	-0.0841774	0.263893	1.09402	0.919268	1.30199
129	eqtl-a-ENSG00000204305	Lung adenocarcinoma	Lung adenocarcinoma || id:ieu-a-984	|| id:eqtl-a-ENSG00000204305	Simple mode	6	0.289023	0.190958	0.190559	-0.0852544	0.6633	1.33512	0.918279	1.94119
130	eqtl-a-ENSG00000204305	Lung adenocarcinoma	Lung adenocarcinoma || id:ieu-a-984	|| id:eqtl-a-ENSG00000204305	Weighted mode	6	-0.0670099	0.139908	0.652182	-0.341229	0.207209	0.935186	0.710896	1.23024
131	eqtl-a-ENSG00000144655	Lung adenocarcinoma	Lung adenocarcinoma || id:ieu-a-984	|| id:eqtl-a-ENSG00000144655	MR Egger	5	0.323581	0.18323	0.175576	-0.0355509	0.682712	1.38207	0.965074	1.97924
132	eqtl-a-ENSG00000144655	Lung adenocarcinoma	Lung adenocarcinoma || id:ieu-a-984	|| id:eqtl-a-ENSG00000144655	Weighted median	5	0.0328692	0.0842493	0.696432	-0.132259	0.197998	1.03342	0.876114	1.21896
133	eqtl-a-ENSG00000144655	Lung adenocarcinoma	Lung adenocarcinoma || id:ieu-a-984	|| id:eqtl-a-ENSG00000144655	Inverse variance weighted	5	-0.0284082	0.0824085	0.730301	-0.189929	0.133112	0.971991	0.827018	1.14238
134	eqtl-a-ENSG00000144655	Lung adenocarcinoma	Lung adenocarcinoma || id:ieu-a-984	|| id:eqtl-a-ENSG00000144655	Simple mode	5	0.0641318	0.133288	0.655545	-0.197113	0.325377	1.06623	0.821098	1.38455
135	eqtl-a-ENSG00000144655	Lung adenocarcinoma	Lung adenocarcinoma || id:ieu-a-984	|| id:eqtl-a-ENSG00000144655	Weighted mode	5	0.0413351	0.0834467	0.646333	-0.122221	0.204891	1.0422	0.884953	1.22739
136	eqtl-a-ENSG00000136114	Lung adenocarcinoma	Lung adenocarcinoma || id:ieu-a-984	|| id:eqtl-a-ENSG00000136114	MR Egger	6	-0.0406692	0.867895	0.964871	-1.74174	1.66041	0.960147	0.175215	5.26144
137	eqtl-a-ENSG00000136114	Lung adenocarcinoma	Lung adenocarcinoma || id:ieu-a-984	|| id:eqtl-a-ENSG00000136114	Weighted median	6	0.0864341	0.0761873	0.256587	-0.0628929	0.235761	1.09028	0.939044	1.26587
138	eqtl-a-ENSG00000136114	Lung adenocarcinoma	Lung adenocarcinoma || id:ieu-a-984	|| id:eqtl-a-ENSG00000136114	Inverse variance weighted	6	0.0903054	0.0672375	0.179246	-0.0414801	0.222091	1.09451	0.959368	1.24868
139	eqtl-a-ENSG00000136114	Lung adenocarcinoma	Lung adenocarcinoma || id:ieu-a-984	|| id:eqtl-a-ENSG00000136114	Simple mode	6	0.0850389	0.103064	0.446876	-0.116967	0.287045	1.08876	0.889614	1.33248
140	eqtl-a-ENSG00000136114	Lung adenocarcinoma	Lung adenocarcinoma || id:ieu-a-984	|| id:eqtl-a-ENSG00000136114	Weighted mode	6	0.0860328	0.101386	0.434855	-0.112684	0.284749	1.08984	0.893433	1.32943
141	eqtl-a-ENSG00000169252	Lung adenocarcinoma	Lung adenocarcinoma || id:ieu-a-984	|| id:eqtl-a-ENSG00000169252	MR Egger	3	-1.29583	0.621823	0.28483	-2.5146	-0.0770593	0.27367	0.0808949	0.925835
142	eqtl-a-ENSG00000169252	Lung adenocarcinoma	Lung adenocarcinoma || id:ieu-a-984	|| id:eqtl-a-ENSG00000169252	Weighted median	3	-0.132901	0.0832194	0.110266	-0.296011	0.0302089	0.875552	0.743779	1.03067
143	eqtl-a-ENSG00000169252	Lung adenocarcinoma	Lung adenocarcinoma || id:ieu-a-984	|| id:eqtl-a-ENSG00000169252	Inverse variance weighted	3	-0.161754	0.101952	0.112612	-0.36158	0.0380729	0.850651	0.696575	1.03881
144	eqtl-a-ENSG00000169252	Lung adenocarcinoma	Lung adenocarcinoma || id:ieu-a-984	|| id:eqtl-a-ENSG00000169252	Simple mode	3	-0.061911	0.125918	0.671613	-0.308711	0.184889	0.939967	0.734393	1.20308
145	eqtl-a-ENSG00000169252	Lung adenocarcinoma	Lung adenocarcinoma || id:ieu-a-984	|| id:eqtl-a-ENSG00000169252	Weighted mode	3	-0.125457	0.0909165	0.301625	-0.303654	0.0527391	0.882093	0.738116	1.05415
146	eqtl-a-ENSG00000173269	Lung adenocarcinoma	Lung adenocarcinoma || id:ieu-a-984	|| id:eqtl-a-ENSG00000173269	MR Egger	3	0.162472	0.396372	0.752349	-0.614418	0.939362	1.17642	0.540956	2.55835
147	eqtl-a-ENSG00000173269	Lung adenocarcinoma	Lung adenocarcinoma || id:ieu-a-984	|| id:eqtl-a-ENSG00000173269	Weighted median	3	0.0916299	0.135757	0.499704	-0.174454	0.357714	1.09596	0.839916	1.43006
148	eqtl-a-ENSG00000173269	Lung adenocarcinoma	Lung adenocarcinoma || id:ieu-a-984	|| id:eqtl-a-ENSG00000173269	Inverse variance weighted	3	0.0878758	0.119402	0.46175	-0.146152	0.321903	1.09185	0.864027	1.37975
149	eqtl-a-ENSG00000173269	Lung adenocarcinoma	Lung adenocarcinoma || id:ieu-a-984	|| id:eqtl-a-ENSG00000173269	Simple mode	3	0.0722169	0.155914	0.688748	-0.233374	0.377808	1.07489	0.791857	1.45908
150	eqtl-a-ENSG00000173269	Lung adenocarcinoma	Lung adenocarcinoma || id:ieu-a-984	|| id:eqtl-a-ENSG00000173269	Weighted mode	3	0.105052	0.14916	0.554212	-0.187301	0.397405	1.11077	0.829194	1.48796
151	eqtl-a-ENSG00000105974	Lung adenocarcinoma	Lung adenocarcinoma || id:ieu-a-984	|| id:eqtl-a-ENSG00000105974	MR Egger	3	0.199363	1.76157	0.928257	-3.25331	3.65203	1.22062	0.0386463	38.5529
152	eqtl-a-ENSG00000105974	Lung adenocarcinoma	Lung adenocarcinoma || id:ieu-a-984	|| id:eqtl-a-ENSG00000105974	Weighted median	3	0.0244674	0.120146	0.838629	-0.211019	0.259954	1.02477	0.809759	1.29687
153	eqtl-a-ENSG00000105974	Lung adenocarcinoma	Lung adenocarcinoma || id:ieu-a-984	|| id:eqtl-a-ENSG00000105974	Inverse variance weighted	3	0.0331754	0.111132	0.765304	-0.184643	0.250994	1.03373	0.831401	1.2853
154	eqtl-a-ENSG00000105974	Lung adenocarcinoma	Lung adenocarcinoma || id:ieu-a-984	|| id:eqtl-a-ENSG00000105974	Simple mode	3	0.01756	0.153927	0.919595	-0.284137	0.319257	1.01772	0.752663	1.37611
155	eqtl-a-ENSG00000105974	Lung adenocarcinoma	Lung adenocarcinoma || id:ieu-a-984	|| id:eqtl-a-ENSG00000105974	Weighted mode	3	0.0193459	0.147328	0.907546	-0.269416	0.308108	1.01953	0.763825	1.36085
156	eqtl-a-ENSG00000173457	Lung adenocarcinoma	Lung adenocarcinoma || id:ieu-a-984	|| id:eqtl-a-ENSG00000173457	MR Egger	3	0.0598897	0.504909	0.924839	-0.929731	1.04951	1.06172	0.39466	2.85625
157	eqtl-a-ENSG00000173457	Lung adenocarcinoma	Lung adenocarcinoma || id:ieu-a-984	|| id:eqtl-a-ENSG00000173457	Weighted median	3	-0.169289	0.100646	0.0925655	-0.366555	0.0279779	0.844265	0.693118	1.02837
158	eqtl-a-ENSG00000173457	Lung adenocarcinoma	Lung adenocarcinoma || id:ieu-a-984	|| id:eqtl-a-ENSG00000173457	Inverse variance weighted	3	-0.193902	0.0877453	0.0271174	-0.365883	-0.0219209	0.823739	0.693584	0.978318
159	eqtl-a-ENSG00000173457	Lung adenocarcinoma	Lung adenocarcinoma || id:ieu-a-984	|| id:eqtl-a-ENSG00000173457	Simple mode	3	-0.166447	0.123134	0.309035	-0.407789	0.0748947	0.846668	0.665119	1.07777
160	eqtl-a-ENSG00000173457	Lung adenocarcinoma	Lung adenocarcinoma || id:ieu-a-984	|| id:eqtl-a-ENSG00000173457	Weighted mode	3	-0.166447	0.117512	0.292341	-0.396771	0.0638768	0.846668	0.672488	1.06596
161	eqtl-a-ENSG00000133800	Lung adenocarcinoma	Lung adenocarcinoma || id:ieu-a-984	|| id:eqtl-a-ENSG00000133800	MR Egger	4	0.0984243	0.131206	0.531406	-0.15874	0.355589	1.10343	0.853218	1.42702
162	eqtl-a-ENSG00000133800	Lung adenocarcinoma	Lung adenocarcinoma || id:ieu-a-984	|| id:eqtl-a-ENSG00000133800	Weighted median	4	0.0453172	0.0669129	0.498243	-0.085832	0.176466	1.04636	0.917748	1.19299
163	eqtl-a-ENSG00000133800	Lung adenocarcinoma	Lung adenocarcinoma || id:ieu-a-984	|| id:eqtl-a-ENSG00000133800	Inverse variance weighted	4	0.0534924	0.0607573	0.378628	-0.065592	0.172577	1.05495	0.936513	1.18836
164	eqtl-a-ENSG00000133800	Lung adenocarcinoma	Lung adenocarcinoma || id:ieu-a-984	|| id:eqtl-a-ENSG00000133800	Simple mode	4	-0.0334482	0.11359	0.787604	-0.256086	0.189189	0.967105	0.774076	1.20827
165	eqtl-a-ENSG00000133800	Lung adenocarcinoma	Lung adenocarcinoma || id:ieu-a-984	|| id:eqtl-a-ENSG00000133800	Weighted mode	4	0.0559388	0.0746666	0.508142	-0.0904078	0.202285	1.05753	0.913559	1.2242
166	eqtl-a-ENSG00000163815	Lung adenocarcinoma	Lung adenocarcinoma || id:ieu-a-984	|| id:eqtl-a-ENSG00000163815	MR Egger	13	0.019514	0.0441874	0.667321	-0.0670932	0.106121	1.01971	0.935108	1.11196
167	eqtl-a-ENSG00000163815	Lung adenocarcinoma	Lung adenocarcinoma || id:ieu-a-984	|| id:eqtl-a-ENSG00000163815	Weighted median	13	0.0186598	0.026404	0.47975	-0.033092	0.0704117	1.01884	0.96745	1.07295
168	eqtl-a-ENSG00000163815	Lung adenocarcinoma	Lung adenocarcinoma || id:ieu-a-984	|| id:eqtl-a-ENSG00000163815	Inverse variance weighted	13	0.0134237	0.0212945	0.528445	-0.0283135	0.0551608	1.01351	0.972084	1.05671
169	eqtl-a-ENSG00000163815	Lung adenocarcinoma	Lung adenocarcinoma || id:ieu-a-984	|| id:eqtl-a-ENSG00000163815	Simple mode	13	0.0224495	0.0380314	0.565948	-0.052092	0.096991	1.0227	0.949242	1.10185
170	eqtl-a-ENSG00000163815	Lung adenocarcinoma	Lung adenocarcinoma || id:ieu-a-984	|| id:eqtl-a-ENSG00000163815	Weighted mode	13	0.019089	0.024945	0.458912	-0.0298031	0.0679812	1.01927	0.970637	1.07035
171	eqtl-a-ENSG00000127329	Lung adenocarcinoma	Lung adenocarcinoma || id:ieu-a-984	|| id:eqtl-a-ENSG00000127329	MR Egger	5	-0.10096	0.201672	0.651063	-0.496238	0.294317	0.903969	0.608817	1.34221
172	eqtl-a-ENSG00000127329	Lung adenocarcinoma	Lung adenocarcinoma || id:ieu-a-984	|| id:eqtl-a-ENSG00000127329	Weighted median	5	-0.0552169	0.0765482	0.470704	-0.205251	0.0948176	0.94628	0.814443	1.09946
173	eqtl-a-ENSG00000127329	Lung adenocarcinoma	Lung adenocarcinoma || id:ieu-a-984	|| id:eqtl-a-ENSG00000127329	Inverse variance weighted	5	-0.049826	0.0719233	0.488457	-0.190796	0.0911437	0.951395	0.826301	1.09543
174	eqtl-a-ENSG00000127329	Lung adenocarcinoma	Lung adenocarcinoma || id:ieu-a-984	|| id:eqtl-a-ENSG00000127329	Simple mode	5	-0.198687	0.138824	0.225619	-0.470783	0.0734083	0.819806	0.624513	1.07617
175	eqtl-a-ENSG00000127329	Lung adenocarcinoma	Lung adenocarcinoma || id:ieu-a-984	|| id:eqtl-a-ENSG00000127329	Weighted mode	5	-0.0351265	0.0938158	0.727095	-0.219005	0.148752	0.965483	0.803317	1.16039
176	eqtl-a-ENSG00000164849	Lung adenocarcinoma	Lung adenocarcinoma || id:ieu-a-984	|| id:eqtl-a-ENSG00000164849	MR Egger	17	0.0330317	0.0215944	0.146917	-0.00929323	0.0753567	1.03358	0.99075	1.07827
177	eqtl-a-ENSG00000164849	Lung adenocarcinoma	Lung adenocarcinoma || id:ieu-a-984	|| id:eqtl-a-ENSG00000164849	Weighted median	17	0.0110866	0.0174478	0.525158	-0.023111	0.0452842	1.01115	0.977154	1.04633
178	eqtl-a-ENSG00000164849	Lung adenocarcinoma	Lung adenocarcinoma || id:ieu-a-984	|| id:eqtl-a-ENSG00000164849	Inverse variance weighted	17	0.0135297	0.0147327	0.358439	-0.0153464	0.0424058	1.01362	0.984771	1.04332
179	eqtl-a-ENSG00000164849	Lung adenocarcinoma	Lung adenocarcinoma || id:ieu-a-984	|| id:eqtl-a-ENSG00000164849	Simple mode	17	0.0187579	0.0372052	0.621011	-0.0541643	0.0916801	1.01893	0.947276	1.09601
180	eqtl-a-ENSG00000164849	Lung adenocarcinoma	Lung adenocarcinoma || id:ieu-a-984	|| id:eqtl-a-ENSG00000164849	Weighted mode	17	0.011564	0.0168534	0.502439	-0.0214686	0.0445966	1.01163	0.97876	1.04561
181	eqtl-a-ENSG00000114812	Lung adenocarcinoma	Lung adenocarcinoma || id:ieu-a-984	|| id:eqtl-a-ENSG00000114812	MR Egger	22	0.0386022	0.0488358	0.438539	-0.0571161	0.13432	1.03936	0.944484	1.14376
182	eqtl-a-ENSG00000114812	Lung adenocarcinoma	Lung adenocarcinoma || id:ieu-a-984	|| id:eqtl-a-ENSG00000114812	Weighted median	22	0.00896504	0.0373371	0.810244	-0.0642156	0.0821457	1.00901	0.937803	1.08561
183	eqtl-a-ENSG00000114812	Lung adenocarcinoma	Lung adenocarcinoma || id:ieu-a-984	|| id:eqtl-a-ENSG00000114812	Inverse variance weighted	22	-0.00116754	0.0289453	0.967825	-0.0579003	0.0555652	0.998833	0.943744	1.05714
184	eqtl-a-ENSG00000114812	Lung adenocarcinoma	Lung adenocarcinoma || id:ieu-a-984	|| id:eqtl-a-ENSG00000114812	Simple mode	22	0.0163698	0.0555187	0.771002	-0.0924469	0.125187	1.0165	0.911698	1.13336
185	eqtl-a-ENSG00000114812	Lung adenocarcinoma	Lung adenocarcinoma || id:ieu-a-984	|| id:eqtl-a-ENSG00000114812	Weighted mode	22	0.0134814	0.0375242	0.722978	-0.060066	0.0870288	1.01357	0.941702	1.09093
186	eqtl-a-ENSG00000125810	Lung adenocarcinoma	Lung adenocarcinoma || id:ieu-a-984	|| id:eqtl-a-ENSG00000125810	MR Egger	38	0.0731682	0.0255561	0.0069537	0.0230783	0.123258	1.07591	1.02335	1.13118
187	eqtl-a-ENSG00000125810	Lung adenocarcinoma	Lung adenocarcinoma || id:ieu-a-984	|| id:eqtl-a-ENSG00000125810	Weighted median	38	0.0411502	0.0257278	0.109721	-0.00927617	0.0915766	1.04201	0.990767	1.0959
188	eqtl-a-ENSG00000125810	Lung adenocarcinoma	Lung adenocarcinoma || id:ieu-a-984	|| id:eqtl-a-ENSG00000125810	Inverse variance weighted	38	0.0302197	0.0177815	0.0892244	-0.00463202	0.0650714	1.03068	0.995379	1.06724
189	eqtl-a-ENSG00000125810	Lung adenocarcinoma	Lung adenocarcinoma || id:ieu-a-984	|| id:eqtl-a-ENSG00000125810	Simple mode	38	0.0276745	0.0422945	0.516947	-0.0552228	0.110572	1.02806	0.946274	1.11692
190	eqtl-a-ENSG00000125810	Lung adenocarcinoma	Lung adenocarcinoma || id:ieu-a-984	|| id:eqtl-a-ENSG00000125810	Weighted mode	38	0.0540146	0.0224201	0.0210802	0.0100712	0.097958	1.0555	1.01012	1.10292
191	eqtl-a-ENSG00000138821	Lung adenocarcinoma	Lung adenocarcinoma || id:ieu-a-984	|| id:eqtl-a-ENSG00000138821	MR Egger	8	0.0106501	0.17732	0.954057	-0.336897	0.358197	1.01071	0.713983	1.43075
192	eqtl-a-ENSG00000138821	Lung adenocarcinoma	Lung adenocarcinoma || id:ieu-a-984	|| id:eqtl-a-ENSG00000138821	Weighted median	8	-0.0483294	0.0622459	0.437497	-0.170331	0.0736725	0.95282	0.843385	1.07645
193	eqtl-a-ENSG00000138821	Lung adenocarcinoma	Lung adenocarcinoma || id:ieu-a-984	|| id:eqtl-a-ENSG00000138821	Inverse variance weighted	8	-0.0516305	0.0532086	0.331876	-0.155919	0.0526583	0.94968	0.855628	1.05407
194	eqtl-a-ENSG00000138821	Lung adenocarcinoma	Lung adenocarcinoma || id:ieu-a-984	|| id:eqtl-a-ENSG00000138821	Simple mode	8	-0.00572012	0.0991263	0.955596	-0.200008	0.188567	0.994296	0.818724	1.20752
195	eqtl-a-ENSG00000138821	Lung adenocarcinoma	Lung adenocarcinoma || id:ieu-a-984	|| id:eqtl-a-ENSG00000138821	Weighted mode	8	-0.0562122	0.0635759	0.405944	-0.180821	0.0683965	0.945339	0.834585	1.07079
196	eqtl-a-ENSG00000197465	Lung adenocarcinoma	Lung adenocarcinoma || id:ieu-a-984	|| id:eqtl-a-ENSG00000197465	MR Egger	21	0.009876	0.0251382	0.69879	-0.0393948	0.0591468	1.00992	0.961371	1.06093
197	eqtl-a-ENSG00000197465	Lung adenocarcinoma	Lung adenocarcinoma || id:ieu-a-984	|| id:eqtl-a-ENSG00000197465	Weighted median	21	0.00190662	0.0143613	0.894382	-0.0262414	0.0300547	1.00191	0.9741	1.03051
198	eqtl-a-ENSG00000197465	Lung adenocarcinoma	Lung adenocarcinoma || id:ieu-a-984	|| id:eqtl-a-ENSG00000197465	Inverse variance weighted	21	0.00325282	0.0119806	0.786	-0.0202291	0.0267348	1.00326	0.979974	1.0271
199	eqtl-a-ENSG00000197465	Lung adenocarcinoma	Lung adenocarcinoma || id:ieu-a-984	|| id:eqtl-a-ENSG00000197465	Simple mode	21	0.0233337	0.026483	0.38874	-0.028573	0.0752403	1.02361	0.971831	1.07814
200	eqtl-a-ENSG00000197465	Lung adenocarcinoma	Lung adenocarcinoma || id:ieu-a-984	|| id:eqtl-a-ENSG00000197465	Weighted mode	21	0.00291555	0.0119685	0.81002	-0.0205427	0.0263738	1.00292	0.979667	1.02672
201	eqtl-a-ENSG00000105538	Lung adenocarcinoma	Lung adenocarcinoma || id:ieu-a-984	|| id:eqtl-a-ENSG00000105538	MR Egger	3	0.79695	0.789113	0.496854	-0.749711	2.34361	2.21876	0.472503	10.4188
202	eqtl-a-ENSG00000105538	Lung adenocarcinoma	Lung adenocarcinoma || id:ieu-a-984	|| id:eqtl-a-ENSG00000105538	Weighted median	3	0.454882	0.127387	0.00035581	0.205203	0.704561	1.57599	1.22777	2.02296
203	eqtl-a-ENSG00000105538	Lung adenocarcinoma	Lung adenocarcinoma || id:ieu-a-984	|| id:eqtl-a-ENSG00000105538	Inverse variance weighted	3	0.406735	0.151678	0.00732773	0.109446	0.704023	1.50191	1.11566	2.02187
204	eqtl-a-ENSG00000105538	Lung adenocarcinoma	Lung adenocarcinoma || id:ieu-a-984	|| id:eqtl-a-ENSG00000105538	Simple mode	3	0.534445	0.174828	0.0924137	0.191783	0.877108	1.7065	1.21141	2.40394
205	eqtl-a-ENSG00000105538	Lung adenocarcinoma	Lung adenocarcinoma || id:ieu-a-984	|| id:eqtl-a-ENSG00000105538	Weighted mode	3	0.48933	0.155551	0.0879277	0.18445	0.79421	1.63122	1.20256	2.21269
206	eqtl-a-ENSG00000108370	Lung adenocarcinoma	Lung adenocarcinoma || id:ieu-a-984	|| id:eqtl-a-ENSG00000108370	MR Egger	4	0.0850652	0.219877	0.736133	-0.345895	0.516025	1.08879	0.707587	1.67535
207	eqtl-a-ENSG00000108370	Lung adenocarcinoma	Lung adenocarcinoma || id:ieu-a-984	|| id:eqtl-a-ENSG00000108370	Weighted median	4	0.0265417	0.12757	0.835185	-0.223495	0.276579	1.0269	0.799719	1.31861
208	eqtl-a-ENSG00000108370	Lung adenocarcinoma	Lung adenocarcinoma || id:ieu-a-984	|| id:eqtl-a-ENSG00000108370	Inverse variance weighted	4	0.0424918	0.115258	0.712377	-0.183415	0.268398	1.04341	0.832423	1.30787
209	eqtl-a-ENSG00000108370	Lung adenocarcinoma	Lung adenocarcinoma || id:ieu-a-984	|| id:eqtl-a-ENSG00000108370	Simple mode	4	0.0228024	0.169109	0.901278	-0.308652	0.354256	1.02306	0.734437	1.42512
210	eqtl-a-ENSG00000108370	Lung adenocarcinoma	Lung adenocarcinoma || id:ieu-a-984	|| id:eqtl-a-ENSG00000108370	Weighted mode	4	0.0197664	0.159578	0.909254	-0.293007	0.33254	1.01996	0.746017	1.39451
211	eqtl-a-ENSG00000149557	Lung adenocarcinoma	Lung adenocarcinoma || id:ieu-a-984	|| id:eqtl-a-ENSG00000149557	MR Egger	8	0.0999511	0.0856597	0.287548	-0.0679419	0.267844	1.10512	0.934315	1.30714
212	eqtl-a-ENSG00000149557	Lung adenocarcinoma	Lung adenocarcinoma || id:ieu-a-984	|| id:eqtl-a-ENSG00000149557	Weighted median	8	0.0171143	0.0526891	0.74532	-0.0861563	0.120385	1.01726	0.917451	1.12793
213	eqtl-a-ENSG00000149557	Lung adenocarcinoma	Lung adenocarcinoma || id:ieu-a-984	|| id:eqtl-a-ENSG00000149557	Inverse variance weighted	8	-0.00491426	0.0443042	0.911679	-0.0917504	0.0819219	0.995098	0.912333	1.08537
214	eqtl-a-ENSG00000149557	Lung adenocarcinoma	Lung adenocarcinoma || id:ieu-a-984	|| id:eqtl-a-ENSG00000149557	Simple mode	8	-0.00939715	0.0796037	0.909345	-0.16542	0.146626	0.990647	0.847537	1.15792
215	eqtl-a-ENSG00000149557	Lung adenocarcinoma	Lung adenocarcinoma || id:ieu-a-984	|| id:eqtl-a-ENSG00000149557	Weighted mode	8	0.0230202	0.0528634	0.676336	-0.080592	0.126632	1.02329	0.92257	1.135
216	eqtl-a-ENSG00000079308	Lung adenocarcinoma	Lung adenocarcinoma || id:ieu-a-984	|| id:eqtl-a-ENSG00000079308	MR Egger	7	-0.0605393	0.0710857	0.4333	-0.199867	0.0787886	0.941257	0.818839	1.08198
217	eqtl-a-ENSG00000079308	Lung adenocarcinoma	Lung adenocarcinoma || id:ieu-a-984	|| id:eqtl-a-ENSG00000079308	Weighted median	7	-0.0415419	0.0388957	0.285506	-0.117778	0.0346937	0.959309	0.888894	1.0353
218	eqtl-a-ENSG00000079308	Lung adenocarcinoma	Lung adenocarcinoma || id:ieu-a-984	|| id:eqtl-a-ENSG00000079308	Inverse variance weighted	7	-0.030931	0.0374243	0.408523	-0.104283	0.0424206	0.969542	0.900971	1.04333
219	eqtl-a-ENSG00000079308	Lung adenocarcinoma	Lung adenocarcinoma || id:ieu-a-984	|| id:eqtl-a-ENSG00000079308	Simple mode	7	-0.0145534	0.0780855	0.858291	-0.167601	0.138494	0.985552	0.845691	1.14854
220	eqtl-a-ENSG00000079308	Lung adenocarcinoma	Lung adenocarcinoma || id:ieu-a-984	|| id:eqtl-a-ENSG00000079308	Weighted mode	7	-0.0450943	0.0386225	0.287276	-0.120794	0.0306057	0.955907	0.886216	1.03108
221	eqtl-a-ENSG00000079462	Lung adenocarcinoma	Lung adenocarcinoma || id:ieu-a-984	|| id:eqtl-a-ENSG00000079462	MR Egger	6	0.272077	0.215029	0.274449	-0.149379	0.693533	1.31269	0.861243	2.00077
222	eqtl-a-ENSG00000079462	Lung adenocarcinoma	Lung adenocarcinoma || id:ieu-a-984	|| id:eqtl-a-ENSG00000079462	Weighted median	6	0.178891	0.0676238	0.00815979	0.0463484	0.311434	1.19589	1.04744	1.36538
223	eqtl-a-ENSG00000079462	Lung adenocarcinoma	Lung adenocarcinoma || id:ieu-a-984	|| id:eqtl-a-ENSG00000079462	Inverse variance weighted	6	0.158766	0.0554367	0.00418452	0.0501096	0.267422	1.17206	1.05139	1.30659
224	eqtl-a-ENSG00000079462	Lung adenocarcinoma	Lung adenocarcinoma || id:ieu-a-984	|| id:eqtl-a-ENSG00000079462	Simple mode	6	0.0988428	0.0976407	0.357842	-0.092533	0.290219	1.10389	0.911619	1.33672
225	eqtl-a-ENSG00000079462	Lung adenocarcinoma	Lung adenocarcinoma || id:ieu-a-984	|| id:eqtl-a-ENSG00000079462	Weighted mode	6	0.18232	0.0931321	0.107612	-0.000219133	0.364859	1.2	0.999781	1.44031
226	eqtl-a-ENSG00000114854	Lung adenocarcinoma	Lung adenocarcinoma || id:ieu-a-984	|| id:eqtl-a-ENSG00000114854	MR Egger	6	-0.24976	0.14937	0.169825	-0.542526	0.0430058	0.778987	0.581278	1.04394
227	eqtl-a-ENSG00000114854	Lung adenocarcinoma	Lung adenocarcinoma || id:ieu-a-984	|| id:eqtl-a-ENSG00000114854	Weighted median	6	-0.207484	0.0587981	0.00041752	-0.322728	-0.0922398	0.812626	0.72417	0.911886
228	eqtl-a-ENSG00000114854	Lung adenocarcinoma	Lung adenocarcinoma || id:ieu-a-984	|| id:eqtl-a-ENSG00000114854	Inverse variance weighted	6	-0.19258	0.0524541	0.000241215	-0.29539	-0.0897705	0.824828	0.744241	0.914141
229	eqtl-a-ENSG00000114854	Lung adenocarcinoma	Lung adenocarcinoma || id:ieu-a-984	|| id:eqtl-a-ENSG00000114854	Simple mode	6	-0.206753	0.0843228	0.0577991	-0.372026	-0.0414808	0.81322	0.689336	0.959368
230	eqtl-a-ENSG00000114854	Lung adenocarcinoma	Lung adenocarcinoma || id:ieu-a-984	|| id:eqtl-a-ENSG00000114854	Weighted mode	6	-0.209581	0.0770261	0.0417299	-0.360552	-0.0586095	0.810924	0.697292	0.943075
231	eqtl-a-ENSG00000173706	Lung adenocarcinoma	Lung adenocarcinoma || id:ieu-a-984	|| id:eqtl-a-ENSG00000173706	MR Egger	6	0.0151542	0.0672162	0.832676	-0.11659	0.146898	1.01527	0.88995	1.15824
232	eqtl-a-ENSG00000173706	Lung adenocarcinoma	Lung adenocarcinoma || id:ieu-a-984	|| id:eqtl-a-ENSG00000173706	Weighted median	6	0.0100446	0.0444095	0.821061	-0.0769981	0.0970872	1.0101	0.925892	1.10196
233	eqtl-a-ENSG00000173706	Lung adenocarcinoma	Lung adenocarcinoma || id:ieu-a-984	|| id:eqtl-a-ENSG00000173706	Inverse variance weighted	6	0.0176317	0.0378191	0.641065	-0.0564938	0.0917571	1.01779	0.945072	1.0961
234	eqtl-a-ENSG00000173706	Lung adenocarcinoma	Lung adenocarcinoma || id:ieu-a-984	|| id:eqtl-a-ENSG00000173706	Simple mode	6	0.019448	0.0643634	0.774695	-0.106704	0.1456	1.01964	0.898791	1.15673
235	eqtl-a-ENSG00000173706	Lung adenocarcinoma	Lung adenocarcinoma || id:ieu-a-984	|| id:eqtl-a-ENSG00000173706	Weighted mode	6	0.00616497	0.0459672	0.898542	-0.0839308	0.0962608	1.00618	0.919495	1.10105
236	eqtl-a-ENSG00000031081	Lung adenocarcinoma	Lung adenocarcinoma || id:ieu-a-984	|| id:eqtl-a-ENSG00000031081	MR Egger	6	-0.103486	0.120498	0.438863	-0.339663	0.132691	0.901689	0.71201	1.1419
237	eqtl-a-ENSG00000031081	Lung adenocarcinoma	Lung adenocarcinoma || id:ieu-a-984	|| id:eqtl-a-ENSG00000031081	Weighted median	6	-0.055619	0.0629042	0.376596	-0.178911	0.0676731	0.945899	0.83618	1.07002
238	eqtl-a-ENSG00000031081	Lung adenocarcinoma	Lung adenocarcinoma || id:ieu-a-984	|| id:eqtl-a-ENSG00000031081	Inverse variance weighted	6	-0.0604483	0.0554499	0.275651	-0.16913	0.0482336	0.941342	0.844399	1.04942
239	eqtl-a-ENSG00000031081	Lung adenocarcinoma	Lung adenocarcinoma || id:ieu-a-984	|| id:eqtl-a-ENSG00000031081	Simple mode	6	-0.128831	0.105502	0.276473	-0.335615	0.0779528	0.879122	0.714898	1.08107
240	eqtl-a-ENSG00000031081	Lung adenocarcinoma	Lung adenocarcinoma || id:ieu-a-984	|| id:eqtl-a-ENSG00000031081	Weighted mode	6	-0.0506697	0.0733349	0.520365	-0.194406	0.0930667	0.950593	0.823323	1.09753
241	eqtl-a-ENSG00000113070	Lung adenocarcinoma	Lung adenocarcinoma || id:ieu-a-984	|| id:eqtl-a-ENSG00000113070	MR Egger	7	-0.00274795	0.12341	0.983096	-0.244632	0.239136	0.997256	0.782993	1.27015
242	eqtl-a-ENSG00000113070	Lung adenocarcinoma	Lung adenocarcinoma || id:ieu-a-984	|| id:eqtl-a-ENSG00000113070	Weighted median	7	-0.00817754	0.0628045	0.896403	-0.131274	0.114919	0.991856	0.876977	1.12178
243	eqtl-a-ENSG00000113070	Lung adenocarcinoma	Lung adenocarcinoma || id:ieu-a-984	|| id:eqtl-a-ENSG00000113070	Inverse variance weighted	7	-0.0344684	0.0518157	0.505915	-0.136027	0.0670904	0.966119	0.872819	1.06939
244	eqtl-a-ENSG00000113070	Lung adenocarcinoma	Lung adenocarcinoma || id:ieu-a-984	|| id:eqtl-a-ENSG00000113070	Simple mode	7	0.000343243	0.0925382	0.997161	-0.181032	0.181718	1.00034	0.834409	1.19928
245	eqtl-a-ENSG00000113070	Lung adenocarcinoma	Lung adenocarcinoma || id:ieu-a-984	|| id:eqtl-a-ENSG00000113070	Weighted mode	7	-0.00614927	0.0692592	0.932141	-0.141897	0.129599	0.99387	0.86771	1.13837
246	eqtl-a-ENSG00000171596	Lung adenocarcinoma	Lung adenocarcinoma || id:ieu-a-984	|| id:eqtl-a-ENSG00000171596	MR Egger	5	0.00882938	0.110438	0.941313	-0.207629	0.225288	1.00887	0.812508	1.25268
247	eqtl-a-ENSG00000171596	Lung adenocarcinoma	Lung adenocarcinoma || id:ieu-a-984	|| id:eqtl-a-ENSG00000171596	Weighted median	5	-0.0330498	0.0618721	0.593228	-0.154319	0.0882195	0.96749	0.856998	1.09223
248	eqtl-a-ENSG00000171596	Lung adenocarcinoma	Lung adenocarcinoma || id:ieu-a-984	|| id:eqtl-a-ENSG00000171596	Inverse variance weighted	5	-0.0476522	0.0549917	0.386198	-0.155436	0.0601316	0.953465	0.856042	1.06198
249	eqtl-a-ENSG00000171596	Lung adenocarcinoma	Lung adenocarcinoma || id:ieu-a-984	|| id:eqtl-a-ENSG00000171596	Simple mode	5	-0.0486151	0.10266	0.660506	-0.249828	0.152598	0.952548	0.778934	1.16486
250	eqtl-a-ENSG00000171596	Lung adenocarcinoma	Lung adenocarcinoma || id:ieu-a-984	|| id:eqtl-a-ENSG00000171596	Weighted mode	5	-0.0288722	0.0634231	0.672558	-0.153181	0.095437	0.971541	0.857974	1.10014
251	eqtl-a-ENSG00000140932	Lung adenocarcinoma	Lung adenocarcinoma || id:ieu-a-984	|| id:eqtl-a-ENSG00000140932	MR Egger	11	0.0229568	0.104377	0.830825	-0.181623	0.227536	1.02322	0.833916	1.2555
252	eqtl-a-ENSG00000140932	Lung adenocarcinoma	Lung adenocarcinoma || id:ieu-a-984	|| id:eqtl-a-ENSG00000140932	Weighted median	11	0.0282993	0.0660786	0.668457	-0.101215	0.157813	1.0287	0.903739	1.17095
253	eqtl-a-ENSG00000140932	Lung adenocarcinoma	Lung adenocarcinoma || id:ieu-a-984	|| id:eqtl-a-ENSG00000140932	Inverse variance weighted	11	0.000288792	0.051807	0.995552	-0.101253	0.10183	1.00029	0.903705	1.1072
254	eqtl-a-ENSG00000140932	Lung adenocarcinoma	Lung adenocarcinoma || id:ieu-a-984	|| id:eqtl-a-ENSG00000140932	Simple mode	11	-0.0652577	0.10709	0.555867	-0.275154	0.144638	0.936826	0.759455	1.15562
255	eqtl-a-ENSG00000140932	Lung adenocarcinoma	Lung adenocarcinoma || id:ieu-a-984	|| id:eqtl-a-ENSG00000140932	Weighted mode	11	0.0460696	0.0857109	0.602677	-0.121924	0.214063	1.04715	0.885216	1.2387
256	eqtl-a-ENSG00000178726	Lung adenocarcinoma	Lung adenocarcinoma || id:ieu-a-984	|| id:eqtl-a-ENSG00000178726	MR Egger	24	0.0951129	0.0418618	0.0332084	0.0130638	0.177162	1.09978	1.01315	1.19382
257	eqtl-a-ENSG00000178726	Lung adenocarcinoma	Lung adenocarcinoma || id:ieu-a-984	|| id:eqtl-a-ENSG00000178726	Weighted median	24	0.0887783	0.0331679	0.00743651	0.0237693	0.153787	1.09284	1.02405	1.16624
258	eqtl-a-ENSG00000178726	Lung adenocarcinoma	Lung adenocarcinoma || id:ieu-a-984	|| id:eqtl-a-ENSG00000178726	Inverse variance weighted	24	0.0740713	0.0248805	0.00291007	0.0253055	0.122837	1.07688	1.02563	1.1307
259	eqtl-a-ENSG00000178726	Lung adenocarcinoma	Lung adenocarcinoma || id:ieu-a-984	|| id:eqtl-a-ENSG00000178726	Simple mode	24	0.0600653	0.0511141	0.251968	-0.0401183	0.160249	1.06191	0.960676	1.1738
260	eqtl-a-ENSG00000178726	Lung adenocarcinoma	Lung adenocarcinoma || id:ieu-a-984	|| id:eqtl-a-ENSG00000178726	Weighted mode	24	0.0803634	0.0293193	0.0116416	0.0228975	0.137829	1.08368	1.02316	1.14778
261	eqtl-a-ENSG00000150625	Lung adenocarcinoma	Lung adenocarcinoma || id:ieu-a-984	|| id:eqtl-a-ENSG00000150625	MR Egger	7	0.0171572	0.0762192	0.830809	-0.132232	0.166547	1.01731	0.876137	1.18122
262	eqtl-a-ENSG00000150625	Lung adenocarcinoma	Lung adenocarcinoma || id:ieu-a-984	|| id:eqtl-a-ENSG00000150625	Weighted median	7	0.0107192	0.0394622	0.785905	-0.0666267	0.0880651	1.01078	0.935544	1.09206
263	eqtl-a-ENSG00000150625	Lung adenocarcinoma	Lung adenocarcinoma || id:ieu-a-984	|| id:eqtl-a-ENSG00000150625	Inverse variance weighted	7	-0.0255261	0.0335479	0.446726	-0.09128	0.0402278	0.974797	0.912762	1.04105
264	eqtl-a-ENSG00000150625	Lung adenocarcinoma	Lung adenocarcinoma || id:ieu-a-984	|| id:eqtl-a-ENSG00000150625	Simple mode	7	-0.0314849	0.0844298	0.722032	-0.196967	0.133997	0.969006	0.821217	1.14339
265	eqtl-a-ENSG00000150625	Lung adenocarcinoma	Lung adenocarcinoma || id:ieu-a-984	|| id:eqtl-a-ENSG00000150625	Weighted mode	7	0.014545	0.0408222	0.733809	-0.0654665	0.0945565	1.01465	0.93663	1.09917
266	eqtl-a-ENSG00000101307	Lung adenocarcinoma	Lung adenocarcinoma || id:ieu-a-984	|| id:eqtl-a-ENSG00000101307	MR Egger	21	-0.00857055	0.0327411	0.796318	-0.0727431	0.055602	0.991466	0.92984	1.05718
267	eqtl-a-ENSG00000101307	Lung adenocarcinoma	Lung adenocarcinoma || id:ieu-a-984	|| id:eqtl-a-ENSG00000101307	Weighted median	21	0.0209241	0.0247392	0.397672	-0.0275647	0.0694128	1.02114	0.972812	1.07188
268	eqtl-a-ENSG00000101307	Lung adenocarcinoma	Lung adenocarcinoma || id:ieu-a-984	|| id:eqtl-a-ENSG00000101307	Inverse variance weighted	21	0.00892653	0.01884	0.635638	-0.0279999	0.045853	1.00897	0.972388	1.04692
269	eqtl-a-ENSG00000101307	Lung adenocarcinoma	Lung adenocarcinoma || id:ieu-a-984	|| id:eqtl-a-ENSG00000101307	Simple mode	21	-0.0274173	0.0422206	0.52348	-0.11017	0.0553351	0.972955	0.895682	1.05689
270	eqtl-a-ENSG00000101307	Lung adenocarcinoma	Lung adenocarcinoma || id:ieu-a-984	|| id:eqtl-a-ENSG00000101307	Weighted mode	21	0.012961	0.0220177	0.562678	-0.0301936	0.0561155	1.01305	0.970258	1.05772
271	eqtl-a-ENSG00000183019	Lung adenocarcinoma	Lung adenocarcinoma || id:ieu-a-984	|| id:eqtl-a-ENSG00000183019	MR Egger	9	-0.0230878	0.105806	0.83349	-0.230467	0.184291	0.977177	0.794163	1.20237
272	eqtl-a-ENSG00000183019	Lung adenocarcinoma	Lung adenocarcinoma || id:ieu-a-984	|| id:eqtl-a-ENSG00000183019	Weighted median	9	-0.00535354	0.0507734	0.916027	-0.104869	0.0941623	0.994661	0.900442	1.09874
273	eqtl-a-ENSG00000183019	Lung adenocarcinoma	Lung adenocarcinoma || id:ieu-a-984	|| id:eqtl-a-ENSG00000183019	Inverse variance weighted	9	0.00891041	0.0638725	0.889053	-0.11628	0.1341	1.00895	0.890226	1.14351
274	eqtl-a-ENSG00000183019	Lung adenocarcinoma	Lung adenocarcinoma || id:ieu-a-984	|| id:eqtl-a-ENSG00000183019	Simple mode	9	0.0270384	0.0950758	0.783335	-0.15931	0.213387	1.02741	0.852732	1.23786
275	eqtl-a-ENSG00000183019	Lung adenocarcinoma	Lung adenocarcinoma || id:ieu-a-984	|| id:eqtl-a-ENSG00000183019	Weighted mode	9	-0.00108514	0.0511961	0.983609	-0.101429	0.0992592	0.998915	0.903545	1.10435
276	eqtl-a-ENSG00000090006	Lung adenocarcinoma	Lung adenocarcinoma || id:ieu-a-984	|| id:eqtl-a-ENSG00000090006	MR Egger	5	0.0235831	0.223363	0.922578	-0.414209	0.461375	1.02386	0.660863	1.58625
277	eqtl-a-ENSG00000090006	Lung adenocarcinoma	Lung adenocarcinoma || id:ieu-a-984	|| id:eqtl-a-ENSG00000090006	Weighted median	5	0.0559477	0.0454703	0.218539	-0.033174	0.145069	1.05754	0.96737	1.15612
278	eqtl-a-ENSG00000090006	Lung adenocarcinoma	Lung adenocarcinoma || id:ieu-a-984	|| id:eqtl-a-ENSG00000090006	Inverse variance weighted	5	0.0913637	0.0876282	0.29712	-0.0803876	0.263115	1.09567	0.922759	1.30098
279	eqtl-a-ENSG00000090006	Lung adenocarcinoma	Lung adenocarcinoma || id:ieu-a-984	|| id:eqtl-a-ENSG00000090006	Simple mode	5	0.0171152	0.0983328	0.870277	-0.175617	0.209847	1.01726	0.838939	1.23349
280	eqtl-a-ENSG00000090006	Lung adenocarcinoma	Lung adenocarcinoma || id:ieu-a-984	|| id:eqtl-a-ENSG00000090006	Weighted mode	5	0.047371	0.0448648	0.350583	-0.040564	0.135306	1.04851	0.960248	1.14489
281	eqtl-a-ENSG00000130164	Lung adenocarcinoma	Lung adenocarcinoma || id:ieu-a-984	|| id:eqtl-a-ENSG00000130164	MR Egger	12	-0.231026	0.259878	0.394895	-0.740387	0.278335	0.793719	0.476929	1.32093
282	eqtl-a-ENSG00000130164	Lung adenocarcinoma	Lung adenocarcinoma || id:ieu-a-984	|| id:eqtl-a-ENSG00000130164	Weighted median	12	-0.0626624	0.0801753	0.434469	-0.219806	0.0944812	0.93926	0.802674	1.09909
283	eqtl-a-ENSG00000130164	Lung adenocarcinoma	Lung adenocarcinoma || id:ieu-a-984	|| id:eqtl-a-ENSG00000130164	Inverse variance weighted	12	-0.0360561	0.0841585	0.668337	-0.201007	0.128894	0.964586	0.817907	1.13757
284	eqtl-a-ENSG00000130164	Lung adenocarcinoma	Lung adenocarcinoma || id:ieu-a-984	|| id:eqtl-a-ENSG00000130164	Simple mode	12	0.24365	0.180423	0.204005	-0.10998	0.59728	1.2759	0.895852	1.81717
285	eqtl-a-ENSG00000130164	Lung adenocarcinoma	Lung adenocarcinoma || id:ieu-a-984	|| id:eqtl-a-ENSG00000130164	Weighted mode	12	-0.202535	0.110103	0.0929603	-0.418336	0.0132655	0.816658	0.658141	1.01335
286	eqtl-a-ENSG00000134201	Lung adenocarcinoma	Lung adenocarcinoma || id:ieu-a-984	|| id:eqtl-a-ENSG00000134201	MR Egger	5	-0.0569179	0.259986	0.840755	-0.56649	0.452654	0.944672	0.567514	1.57248
287	eqtl-a-ENSG00000134201	Lung adenocarcinoma	Lung adenocarcinoma || id:ieu-a-984	|| id:eqtl-a-ENSG00000134201	Weighted median	5	-0.064535	0.0528417	0.221976	-0.168105	0.0390346	0.937503	0.845265	1.03981
288	eqtl-a-ENSG00000134201	Lung adenocarcinoma	Lung adenocarcinoma || id:ieu-a-984	|| id:eqtl-a-ENSG00000134201	Inverse variance weighted	5	-0.0573494	0.0544869	0.292553	-0.164144	0.0494448	0.944264	0.84862	1.05069
289	eqtl-a-ENSG00000134201	Lung adenocarcinoma	Lung adenocarcinoma || id:ieu-a-984	|| id:eqtl-a-ENSG00000134201	Simple mode	5	0.121189	0.143154	0.444913	-0.159393	0.401772	1.12884	0.852661	1.49447
290	eqtl-a-ENSG00000134201	Lung adenocarcinoma	Lung adenocarcinoma || id:ieu-a-984	|| id:eqtl-a-ENSG00000134201	Weighted mode	5	-0.075518	0.0553545	0.244201	-0.184013	0.0329769	0.927263	0.831925	1.03353
291	eqtl-a-ENSG00000165810	Lung adenocarcinoma	Lung adenocarcinoma || id:ieu-a-984	|| id:eqtl-a-ENSG00000165810	MR Egger	3	0.617212	0.379556	0.350995	-0.126718	1.36114	1.85375	0.880982	3.90064
292	eqtl-a-ENSG00000165810	Lung adenocarcinoma	Lung adenocarcinoma || id:ieu-a-984	|| id:eqtl-a-ENSG00000165810	Weighted median	3	0.0862265	0.0344392	0.0122891	0.0187257	0.153727	1.09005	1.0189	1.16617
293	eqtl-a-ENSG00000165810	Lung adenocarcinoma	Lung adenocarcinoma || id:ieu-a-984	|| id:eqtl-a-ENSG00000165810	Inverse variance weighted	3	0.0808707	0.0443736	0.06838	-0.00610164	0.167843	1.08423	0.993917	1.18275
294	eqtl-a-ENSG00000165810	Lung adenocarcinoma	Lung adenocarcinoma || id:ieu-a-984	|| id:eqtl-a-ENSG00000165810	Simple mode	3	0.082664	0.049404	0.236255	-0.0141678	0.179496	1.08618	0.985932	1.19661
295	eqtl-a-ENSG00000165810	Lung adenocarcinoma	Lung adenocarcinoma || id:ieu-a-984	|| id:eqtl-a-ENSG00000165810	Weighted mode	3	0.0859658	0.0396838	0.162642	0.00818553	0.163746	1.08977	1.00822	1.17792
296	eqtl-a-ENSG00000092421	Lung adenocarcinoma	Lung adenocarcinoma || id:ieu-a-984	|| id:eqtl-a-ENSG00000092421	MR Egger	5	-0.89607	0.714407	0.298571	-2.29631	0.504168	0.408171	0.10063	1.65561
297	eqtl-a-ENSG00000092421	Lung adenocarcinoma	Lung adenocarcinoma || id:ieu-a-984	|| id:eqtl-a-ENSG00000092421	Weighted median	5	-0.21143	0.0644104	0.00102872	-0.337675	-0.085186	0.809426	0.713427	0.918341
298	eqtl-a-ENSG00000092421	Lung adenocarcinoma	Lung adenocarcinoma || id:ieu-a-984	|| id:eqtl-a-ENSG00000092421	Inverse variance weighted	5	-0.220968	0.0519762	2.12503e-05	-0.322841	-0.119095	0.801742	0.724089	0.887724
299	eqtl-a-ENSG00000092421	Lung adenocarcinoma	Lung adenocarcinoma || id:ieu-a-984	|| id:eqtl-a-ENSG00000092421	Simple mode	5	-0.256663	0.0788676	0.0312472	-0.411243	-0.102082	0.773629	0.662826	0.902956
300	eqtl-a-ENSG00000092421	Lung adenocarcinoma	Lung adenocarcinoma || id:ieu-a-984	|| id:eqtl-a-ENSG00000092421	Weighted mode	5	-0.218846	0.0691463	0.0340214	-0.354373	-0.0833193	0.803445	0.701613	0.920057
301	eqtl-a-ENSG00000158578	Lung adenocarcinoma	Lung adenocarcinoma || id:ieu-a-984	|| id:eqtl-a-ENSG00000158578	MR Egger	8	-0.449697	0.514137	0.415392	-1.4574	0.558011	0.637821	0.23284	1.74719
302	eqtl-a-ENSG00000158578	Lung adenocarcinoma	Lung adenocarcinoma || id:ieu-a-984	|| id:eqtl-a-ENSG00000158578	Weighted median	8	0.0397587	0.0975288	0.683523	-0.151398	0.230915	1.04056	0.859506	1.25975
303	eqtl-a-ENSG00000158578	Lung adenocarcinoma	Lung adenocarcinoma || id:ieu-a-984	|| id:eqtl-a-ENSG00000158578	Inverse variance weighted	8	0.0104614	0.0972725	0.914354	-0.180193	0.201115	1.01052	0.835109	1.22277
304	eqtl-a-ENSG00000158578	Lung adenocarcinoma	Lung adenocarcinoma || id:ieu-a-984	|| id:eqtl-a-ENSG00000158578	Simple mode	8	0.0436809	0.155716	0.78719	-0.261522	0.348883	1.04465	0.769879	1.41748
305	eqtl-a-ENSG00000158578	Lung adenocarcinoma	Lung adenocarcinoma || id:ieu-a-984	|| id:eqtl-a-ENSG00000158578	Weighted mode	8	0.0859849	0.137269	0.550927	-0.183062	0.355032	1.08979	0.832716	1.42623
306	eqtl-a-ENSG00000172159	Lung adenocarcinoma	Lung adenocarcinoma || id:ieu-a-984	|| id:eqtl-a-ENSG00000172159	MR Egger	23	0.121879	0.0450918	0.0133234	0.0334995	0.210259	1.12962	1.03407	1.234
307	eqtl-a-ENSG00000172159	Lung adenocarcinoma	Lung adenocarcinoma || id:ieu-a-984	|| id:eqtl-a-ENSG00000172159	Weighted median	23	0.0794968	0.0375744	0.0343689	0.00585095	0.153143	1.08274	1.00587	1.16549
308	eqtl-a-ENSG00000172159	Lung adenocarcinoma	Lung adenocarcinoma || id:ieu-a-984	|| id:eqtl-a-ENSG00000172159	Inverse variance weighted	23	0.0709502	0.0277982	0.0107004	0.0164658	0.125435	1.07353	1.0166	1.13364
309	eqtl-a-ENSG00000172159	Lung adenocarcinoma	Lung adenocarcinoma || id:ieu-a-984	|| id:eqtl-a-ENSG00000172159	Simple mode	23	0.0196045	0.062107	0.755238	-0.102125	0.141334	1.0198	0.902916	1.15181
310	eqtl-a-ENSG00000172159	Lung adenocarcinoma	Lung adenocarcinoma || id:ieu-a-984	|| id:eqtl-a-ENSG00000172159	Weighted mode	23	0.0816692	0.0354207	0.0309341	0.0122446	0.151094	1.0851	1.01232	1.16311
311	eqtl-a-ENSG00000055813	Lung adenocarcinoma	Lung adenocarcinoma || id:ieu-a-984	|| id:eqtl-a-ENSG00000055813	MR Egger	4	-0.106453	0.166783	0.588628	-0.433347	0.220441	0.899017	0.648335	1.24663
312	eqtl-a-ENSG00000055813	Lung adenocarcinoma	Lung adenocarcinoma || id:ieu-a-984	|| id:eqtl-a-ENSG00000055813	Weighted median	4	-0.0894751	0.0653009	0.170625	-0.217465	0.0385145	0.914411	0.804556	1.03927
313	eqtl-a-ENSG00000055813	Lung adenocarcinoma	Lung adenocarcinoma || id:ieu-a-984	|| id:eqtl-a-ENSG00000055813	Inverse variance weighted	4	-0.0929974	0.058863	0.114131	-0.208369	0.022374	0.911196	0.811908	1.02263
314	eqtl-a-ENSG00000055813	Lung adenocarcinoma	Lung adenocarcinoma || id:ieu-a-984	|| id:eqtl-a-ENSG00000055813	Simple mode	4	-0.0694162	0.101203	0.542023	-0.267774	0.128942	0.932938	0.765081	1.13762
315	eqtl-a-ENSG00000055813	Lung adenocarcinoma	Lung adenocarcinoma || id:ieu-a-984	|| id:eqtl-a-ENSG00000055813	Weighted mode	4	-0.0852631	0.0684684	0.30143	-0.219461	0.048935	0.918271	0.802951	1.05015
316	eqtl-a-ENSG00000110799	Lung adenocarcinoma	Lung adenocarcinoma || id:ieu-a-984	|| id:eqtl-a-ENSG00000110799	MR Egger	22	0.00984904	0.0382981	0.799677	-0.0652153	0.0849134	1.0099	0.936866	1.08862
317	eqtl-a-ENSG00000110799	Lung adenocarcinoma	Lung adenocarcinoma || id:ieu-a-984	|| id:eqtl-a-ENSG00000110799	Weighted median	22	-0.0120596	0.0304314	0.691893	-0.0717051	0.047586	0.988013	0.930805	1.04874
318	eqtl-a-ENSG00000110799	Lung adenocarcinoma	Lung adenocarcinoma || id:ieu-a-984	|| id:eqtl-a-ENSG00000110799	Inverse variance weighted	22	-0.0165309	0.0236683	0.484903	-0.0629207	0.029859	0.983605	0.939018	1.03031
319	eqtl-a-ENSG00000110799	Lung adenocarcinoma	Lung adenocarcinoma || id:ieu-a-984	|| id:eqtl-a-ENSG00000110799	Simple mode	22	-0.0541374	0.0514117	0.304299	-0.154904	0.0466295	0.947302	0.856497	1.04773
320	eqtl-a-ENSG00000110799	Lung adenocarcinoma	Lung adenocarcinoma || id:ieu-a-984	|| id:eqtl-a-ENSG00000110799	Weighted mode	22	-0.0206395	0.0275199	0.461584	-0.0745785	0.0332994	0.979572	0.928135	1.03386
321	eqtl-a-ENSG00000069702	Lung adenocarcinoma	Lung adenocarcinoma || id:ieu-a-984	|| id:eqtl-a-ENSG00000069702	MR Egger	5	0.012264	0.230774	0.960959	-0.440053	0.464581	1.01234	0.644002	1.59135
322	eqtl-a-ENSG00000069702	Lung adenocarcinoma	Lung adenocarcinoma || id:ieu-a-984	|| id:eqtl-a-ENSG00000069702	Weighted median	5	0.0318962	0.0904837	0.724458	-0.145452	0.209244	1.03241	0.864631	1.23275
323	eqtl-a-ENSG00000069702	Lung adenocarcinoma	Lung adenocarcinoma || id:ieu-a-984	|| id:eqtl-a-ENSG00000069702	Inverse variance weighted	5	0.0168133	0.0776401	0.828556	-0.135361	0.168988	1.01696	0.8734	1.18411
324	eqtl-a-ENSG00000069702	Lung adenocarcinoma	Lung adenocarcinoma || id:ieu-a-984	|| id:eqtl-a-ENSG00000069702	Simple mode	5	0.0703075	0.120536	0.591003	-0.165943	0.306558	1.07284	0.847094	1.35874
325	eqtl-a-ENSG00000069702	Lung adenocarcinoma	Lung adenocarcinoma || id:ieu-a-984	|| id:eqtl-a-ENSG00000069702	Weighted mode	5	0.0595085	0.111056	0.620476	-0.158161	0.277178	1.06131	0.853712	1.3194
326	eqtl-a-ENSG00000167434	Lung adenocarcinoma	Lung adenocarcinoma || id:ieu-a-984	|| id:eqtl-a-ENSG00000167434	MR Egger	13	0.126376	0.0423273	0.0123931	0.0434141	0.209337	1.13471	1.04437	1.23286
327	eqtl-a-ENSG00000167434	Lung adenocarcinoma	Lung adenocarcinoma || id:ieu-a-984	|| id:eqtl-a-ENSG00000167434	Weighted median	13	0.0988808	0.0352968	0.00508805	0.029699	0.168063	1.10393	1.03014	1.18301
328	eqtl-a-ENSG00000167434	Lung adenocarcinoma	Lung adenocarcinoma || id:ieu-a-984	|| id:eqtl-a-ENSG00000167434	Inverse variance weighted	13	0.0709805	0.0287533	0.0135641	0.014624	0.127337	1.07356	1.01473	1.1358
329	eqtl-a-ENSG00000167434	Lung adenocarcinoma	Lung adenocarcinoma || id:ieu-a-984	|| id:eqtl-a-ENSG00000167434	Simple mode	13	0.0819337	0.0488335	0.119214	-0.01378	0.177647	1.08538	0.986315	1.1944
330	eqtl-a-ENSG00000167434	Lung adenocarcinoma	Lung adenocarcinoma || id:ieu-a-984	|| id:eqtl-a-ENSG00000167434	Weighted mode	13	0.100333	0.03832	0.0224556	0.0252257	0.17544	1.10554	1.02555	1.19177
331	eqtl-a-ENSG00000004939	Lung adenocarcinoma	Lung adenocarcinoma || id:ieu-a-984	|| id:eqtl-a-ENSG00000004939	MR Egger	10	-0.00388051	0.150887	0.980112	-0.299619	0.291858	0.996127	0.741101	1.33891
332	eqtl-a-ENSG00000004939	Lung adenocarcinoma	Lung adenocarcinoma || id:ieu-a-984	|| id:eqtl-a-ENSG00000004939	Weighted median	10	-0.0927942	0.0651885	0.154598	-0.220564	0.0349751	0.911381	0.802067	1.03559
333	eqtl-a-ENSG00000004939	Lung adenocarcinoma	Lung adenocarcinoma || id:ieu-a-984	|| id:eqtl-a-ENSG00000004939	Inverse variance weighted	10	-0.085832	0.0589619	0.14547	-0.201397	0.0297333	0.917748	0.817588	1.03018
334	eqtl-a-ENSG00000004939	Lung adenocarcinoma	Lung adenocarcinoma || id:ieu-a-984	|| id:eqtl-a-ENSG00000004939	Simple mode	10	-0.0432748	0.126367	0.739872	-0.290954	0.204404	0.957648	0.74755	1.22679
335	eqtl-a-ENSG00000004939	Lung adenocarcinoma	Lung adenocarcinoma || id:ieu-a-984	|| id:eqtl-a-ENSG00000004939	Weighted mode	10	-0.110663	0.0784302	0.191873	-0.264386	0.0430607	0.895241	0.767677	1.044
336	eqtl-a-ENSG00000112137	Lung adenocarcinoma	Lung adenocarcinoma || id:ieu-a-984	|| id:eqtl-a-ENSG00000112137	MR Egger	10	-0.00737636	0.0530615	0.892874	-0.111377	0.0966242	0.992651	0.894601	1.10145
337	eqtl-a-ENSG00000112137	Lung adenocarcinoma	Lung adenocarcinoma || id:ieu-a-984	|| id:eqtl-a-ENSG00000112137	Weighted median	10	-0.0282101	0.0362405	0.436325	-0.0992415	0.0428212	0.972184	0.905524	1.04375
338	eqtl-a-ENSG00000112137	Lung adenocarcinoma	Lung adenocarcinoma || id:ieu-a-984	|| id:eqtl-a-ENSG00000112137	Inverse variance weighted	10	-0.0233487	0.0296925	0.431663	-0.0815459	0.0348486	0.976922	0.92169	1.03546
339	eqtl-a-ENSG00000112137	Lung adenocarcinoma	Lung adenocarcinoma || id:ieu-a-984	|| id:eqtl-a-ENSG00000112137	Simple mode	10	-0.026079	0.059973	0.673914	-0.143626	0.0914681	0.974258	0.866211	1.09578
340	eqtl-a-ENSG00000112137	Lung adenocarcinoma	Lung adenocarcinoma || id:ieu-a-984	|| id:eqtl-a-ENSG00000112137	Weighted mode	10	-0.0339559	0.0369339	0.381883	-0.106346	0.0384346	0.966614	0.899113	1.03918
341	eqtl-a-ENSG00000184113	Lung adenocarcinoma	Lung adenocarcinoma || id:ieu-a-984	|| id:eqtl-a-ENSG00000184113	MR Egger	19	0.0237367	0.0379144	0.539591	-0.0505755	0.0980488	1.02402	0.950682	1.10302
342	eqtl-a-ENSG00000184113	Lung adenocarcinoma	Lung adenocarcinoma || id:ieu-a-984	|| id:eqtl-a-ENSG00000184113	Weighted median	19	0.00521027	0.0284303	0.854591	-0.0505132	0.0609337	1.00522	0.950741	1.06283
343	eqtl-a-ENSG00000184113	Lung adenocarcinoma	Lung adenocarcinoma || id:ieu-a-984	|| id:eqtl-a-ENSG00000184113	Inverse variance weighted	19	0.0144626	0.0226222	0.522623	-0.029877	0.0588021	1.01457	0.970565	1.06057
344	eqtl-a-ENSG00000184113	Lung adenocarcinoma	Lung adenocarcinoma || id:ieu-a-984	|| id:eqtl-a-ENSG00000184113	Simple mode	19	-0.0121346	0.0458604	0.794325	-0.102021	0.0777518	0.987939	0.903011	1.08085
345	eqtl-a-ENSG00000184113	Lung adenocarcinoma	Lung adenocarcinoma || id:ieu-a-984	|| id:eqtl-a-ENSG00000184113	Weighted mode	19	0.00343135	0.0276439	0.90259	-0.0507506	0.0576133	1.00344	0.950516	1.05931
346	eqtl-a-ENSG00000167261	Lung adenocarcinoma	Lung adenocarcinoma || id:ieu-a-984	|| id:eqtl-a-ENSG00000167261	MR Egger	20	-0.175731	0.0550436	0.00504417	-0.283616	-0.0678452	0.838844	0.753056	0.934405
347	eqtl-a-ENSG00000167261	Lung adenocarcinoma	Lung adenocarcinoma || id:ieu-a-984	|| id:eqtl-a-ENSG00000167261	Weighted median	20	-0.11862	0.0242905	1.04267e-06	-0.16623	-0.071011	0.888145	0.846852	0.931452
348	eqtl-a-ENSG00000167261	Lung adenocarcinoma	Lung adenocarcinoma || id:ieu-a-984	|| id:eqtl-a-ENSG00000167261	Inverse variance weighted	20	-0.133215	0.0210006	2.24732e-10	-0.174376	-0.0920541	0.875277	0.839981	0.912056
349	eqtl-a-ENSG00000167261	Lung adenocarcinoma	Lung adenocarcinoma || id:ieu-a-984	|| id:eqtl-a-ENSG00000167261	Simple mode	20	-0.1406	0.0333038	0.000461835	-0.205876	-0.0753247	0.868837	0.813934	0.927442
350	eqtl-a-ENSG00000167261	Lung adenocarcinoma	Lung adenocarcinoma || id:ieu-a-984	|| id:eqtl-a-ENSG00000167261	Weighted mode	20	-0.126144	0.0244826	5.66266e-05	-0.17413	-0.0781586	0.881488	0.840187	0.924818
351	eqtl-a-ENSG00000167874	Lung adenocarcinoma	Lung adenocarcinoma || id:ieu-a-984	|| id:eqtl-a-ENSG00000167874	MR Egger	7	-0.148269	0.222885	0.535356	-0.585123	0.288585	0.862199	0.557037	1.33454
352	eqtl-a-ENSG00000167874	Lung adenocarcinoma	Lung adenocarcinoma || id:ieu-a-984	|| id:eqtl-a-ENSG00000167874	Weighted median	7	-0.115686	0.0603284	0.0551609	-0.23393	0.00255751	0.890755	0.791417	1.00256
353	eqtl-a-ENSG00000167874	Lung adenocarcinoma	Lung adenocarcinoma || id:ieu-a-984	|| id:eqtl-a-ENSG00000167874	Inverse variance weighted	7	-0.122592	0.0505007	0.0152019	-0.221573	-0.0236107	0.884624	0.801257	0.976666
354	eqtl-a-ENSG00000167874	Lung adenocarcinoma	Lung adenocarcinoma || id:ieu-a-984	|| id:eqtl-a-ENSG00000167874	Simple mode	7	-0.152548	0.0831745	0.11633	-0.31557	0.0104742	0.858518	0.729373	1.01053
355	eqtl-a-ENSG00000167874	Lung adenocarcinoma	Lung adenocarcinoma || id:ieu-a-984	|| id:eqtl-a-ENSG00000167874	Weighted mode	7	-0.125156	0.0704122	0.125817	-0.263163	0.0128525	0.88236	0.768616	1.01294
356	eqtl-a-ENSG00000157570	Lung adenocarcinoma	Lung adenocarcinoma || id:ieu-a-984	|| id:eqtl-a-ENSG00000157570	MR Egger	6	-0.0305626	0.26769	0.914603	-0.555236	0.49411	0.9699	0.573937	1.63904
357	eqtl-a-ENSG00000157570	Lung adenocarcinoma	Lung adenocarcinoma || id:ieu-a-984	|| id:eqtl-a-ENSG00000157570	Weighted median	6	0.0278419	0.107722	0.796052	-0.183294	0.238978	1.02823	0.832523	1.26995
358	eqtl-a-ENSG00000157570	Lung adenocarcinoma	Lung adenocarcinoma || id:ieu-a-984	|| id:eqtl-a-ENSG00000157570	Inverse variance weighted	6	-0.00137125	0.0790119	0.986153	-0.156235	0.153492	0.99863	0.855358	1.1659
359	eqtl-a-ENSG00000157570	Lung adenocarcinoma	Lung adenocarcinoma || id:ieu-a-984	|| id:eqtl-a-ENSG00000157570	Simple mode	6	0.0594335	0.157385	0.721203	-0.249041	0.367908	1.06124	0.779548	1.44471
360	eqtl-a-ENSG00000157570	Lung adenocarcinoma	Lung adenocarcinoma || id:ieu-a-984	|| id:eqtl-a-ENSG00000157570	Weighted mode	6	0.057515	0.162315	0.737537	-0.260623	0.375653	1.0592	0.770571	1.45594
361	eqtl-a-ENSG00000166091	Lung adenocarcinoma	Lung adenocarcinoma || id:ieu-a-984	|| id:eqtl-a-ENSG00000166091	MR Egger	18	0.0323881	0.0465412	0.496475	-0.0588327	0.123609	1.03292	0.942865	1.13157
362	eqtl-a-ENSG00000166091	Lung adenocarcinoma	Lung adenocarcinoma || id:ieu-a-984	|| id:eqtl-a-ENSG00000166091	Weighted median	18	0.00761865	0.0300666	0.799965	-0.0513119	0.0665492	1.00765	0.949982	1.06881
363	eqtl-a-ENSG00000166091	Lung adenocarcinoma	Lung adenocarcinoma || id:ieu-a-984	|| id:eqtl-a-ENSG00000166091	Inverse variance weighted	18	0.0119004	0.0296299	0.687954	-0.0461743	0.0699751	1.01197	0.954876	1.07248
364	eqtl-a-ENSG00000166091	Lung adenocarcinoma	Lung adenocarcinoma || id:ieu-a-984	|| id:eqtl-a-ENSG00000166091	Simple mode	18	-0.0552709	0.0749829	0.471106	-0.202237	0.0916957	0.946229	0.816901	1.09603
365	eqtl-a-ENSG00000166091	Lung adenocarcinoma	Lung adenocarcinoma || id:ieu-a-984	|| id:eqtl-a-ENSG00000166091	Weighted mode	18	0.00852759	0.0313042	0.788587	-0.0528286	0.0698837	1.00856	0.948543	1.07238
366	eqtl-a-ENSG00000163687	Lung adenocarcinoma	Lung adenocarcinoma || id:ieu-a-984	|| id:eqtl-a-ENSG00000163687	MR Egger	15	-0.044867	0.0598131	0.466542	-0.162101	0.0723666	0.956125	0.850356	1.07505
367	eqtl-a-ENSG00000163687	Lung adenocarcinoma	Lung adenocarcinoma || id:ieu-a-984	|| id:eqtl-a-ENSG00000163687	Weighted median	15	0.0334681	0.0357435	0.349098	-0.0365891	0.103525	1.03403	0.964072	1.10907
368	eqtl-a-ENSG00000163687	Lung adenocarcinoma	Lung adenocarcinoma || id:ieu-a-984	|| id:eqtl-a-ENSG00000163687	Inverse variance weighted	15	0.0196453	0.0283707	0.488654	-0.0359612	0.0752518	1.01984	0.964678	1.07816
369	eqtl-a-ENSG00000163687	Lung adenocarcinoma	Lung adenocarcinoma || id:ieu-a-984	|| id:eqtl-a-ENSG00000163687	Simple mode	15	0.0143801	0.05513	0.798013	-0.0936747	0.122435	1.01448	0.910579	1.13025
370	eqtl-a-ENSG00000163687	Lung adenocarcinoma	Lung adenocarcinoma || id:ieu-a-984	|| id:eqtl-a-ENSG00000163687	Weighted mode	15	0.0304551	0.0346172	0.393836	-0.0373946	0.0983047	1.03092	0.963296	1.1033
371	eqtl-a-ENSG00000154734	Lung adenocarcinoma	Lung adenocarcinoma || id:ieu-a-984	|| id:eqtl-a-ENSG00000154734	MR Egger	5	-0.0882759	0.0632483	0.257165	-0.212243	0.0356907	0.915508	0.808769	1.03634
372	eqtl-a-ENSG00000154734	Lung adenocarcinoma	Lung adenocarcinoma || id:ieu-a-984	|| id:eqtl-a-ENSG00000154734	Weighted median	5	-0.0532637	0.0434259	0.219995	-0.138378	0.0318511	0.94813	0.870769	1.03236
373	eqtl-a-ENSG00000154734	Lung adenocarcinoma	Lung adenocarcinoma || id:ieu-a-984	|| id:eqtl-a-ENSG00000154734	Inverse variance weighted	5	-0.0474434	0.0420754	0.259497	-0.129911	0.0350244	0.953664	0.878173	1.03564
374	eqtl-a-ENSG00000154734	Lung adenocarcinoma	Lung adenocarcinoma || id:ieu-a-984	|| id:eqtl-a-ENSG00000154734	Simple mode	5	0.026904	0.105628	0.81151	-0.180128	0.233936	1.02727	0.835164	1.26356
375	eqtl-a-ENSG00000154734	Lung adenocarcinoma	Lung adenocarcinoma || id:ieu-a-984	|| id:eqtl-a-ENSG00000154734	Weighted mode	5	-0.0567979	0.0480589	0.302729	-0.150993	0.0373975	0.944785	0.859853	1.03811
376	eqtl-a-ENSG00000174175	Lung adenocarcinoma	Lung adenocarcinoma || id:ieu-a-984	|| id:eqtl-a-ENSG00000174175	MR Egger	16	0.00130296	0.0512636	0.980081	-0.0991736	0.10178	1.0013	0.905585	1.10714
377	eqtl-a-ENSG00000174175	Lung adenocarcinoma	Lung adenocarcinoma || id:ieu-a-984	|| id:eqtl-a-ENSG00000174175	Weighted median	16	0.00293927	0.0325322	0.928009	-0.0608238	0.0667023	1.00294	0.940989	1.06898
378	eqtl-a-ENSG00000174175	Lung adenocarcinoma	Lung adenocarcinoma || id:ieu-a-984	|| id:eqtl-a-ENSG00000174175	Inverse variance weighted	16	0.0101176	0.0283618	0.721291	-0.0454715	0.0657067	1.01017	0.955547	1.06791
379	eqtl-a-ENSG00000174175	Lung adenocarcinoma	Lung adenocarcinoma || id:ieu-a-984	|| id:eqtl-a-ENSG00000174175	Simple mode	16	-0.05563	0.0685661	0.429861	-0.19002	0.0787596	0.945889	0.826943	1.08194
380	eqtl-a-ENSG00000174175	Lung adenocarcinoma	Lung adenocarcinoma || id:ieu-a-984	|| id:eqtl-a-ENSG00000174175	Weighted mode	16	0.0071926	0.0353023	0.841293	-0.0619999	0.0763851	1.00722	0.939883	1.07938
381	eqtl-a-ENSG00000105971	Lung adenocarcinoma	Lung adenocarcinoma || id:ieu-a-984	|| id:eqtl-a-ENSG00000105971	MR Egger	30	0.0892454	0.0310084	0.00757702	0.0284689	0.150022	1.09335	1.02888	1.16186
382	eqtl-a-ENSG00000105971	Lung adenocarcinoma	Lung adenocarcinoma || id:ieu-a-984	|| id:eqtl-a-ENSG00000105971	Weighted median	30	0.0426618	0.0288338	0.138986	-0.0138524	0.099176	1.04358	0.986243	1.10426
383	eqtl-a-ENSG00000105971	Lung adenocarcinoma	Lung adenocarcinoma || id:ieu-a-984	|| id:eqtl-a-ENSG00000105971	Inverse variance weighted	30	0.0512343	0.0206128	0.012935	0.0108331	0.0916354	1.05257	1.01089	1.09597
384	eqtl-a-ENSG00000105971	Lung adenocarcinoma	Lung adenocarcinoma || id:ieu-a-984	|| id:eqtl-a-ENSG00000105971	Simple mode	30	0.0246301	0.0458299	0.595074	-0.0651964	0.114457	1.02494	0.936883	1.12126
385	eqtl-a-ENSG00000105971	Lung adenocarcinoma	Lung adenocarcinoma || id:ieu-a-984	|| id:eqtl-a-ENSG00000105971	Weighted mode	30	0.0557579	0.0254382	0.0365649	0.005899	0.105617	1.05734	1.00592	1.1114
386	eqtl-a-ENSG00000129596	Lung adenocarcinoma	Lung adenocarcinoma || id:ieu-a-984	|| id:eqtl-a-ENSG00000129596	MR Egger	28	0.0489881	0.0279386	0.091314	-0.00577158	0.103748	1.05021	0.994245	1.10932
387	eqtl-a-ENSG00000129596	Lung adenocarcinoma	Lung adenocarcinoma || id:ieu-a-984	|| id:eqtl-a-ENSG00000129596	Weighted median	28	0.0329221	0.0220623	0.135638	-0.0103201	0.0761643	1.03347	0.989733	1.07914
388	eqtl-a-ENSG00000129596	Lung adenocarcinoma	Lung adenocarcinoma || id:ieu-a-984	|| id:eqtl-a-ENSG00000129596	Inverse variance weighted	28	0.0262951	0.018837	0.162737	-0.0106255	0.0632157	1.02664	0.989431	1.06526
389	eqtl-a-ENSG00000129596	Lung adenocarcinoma	Lung adenocarcinoma || id:ieu-a-984	|| id:eqtl-a-ENSG00000129596	Simple mode	28	0.026089	0.0661978	0.696598	-0.103659	0.155837	1.02643	0.901533	1.16864
390	eqtl-a-ENSG00000129596	Lung adenocarcinoma	Lung adenocarcinoma || id:ieu-a-984	|| id:eqtl-a-ENSG00000129596	Weighted mode	28	0.0313751	0.0206351	0.140018	-0.00906966	0.0718198	1.03187	0.990971	1.07446
391	eqtl-a-ENSG00000112902	Lung adenocarcinoma	Lung adenocarcinoma || id:ieu-a-984	|| id:eqtl-a-ENSG00000112902	MR Egger	3	0.0242458	0.0737384	0.797764	-0.120281	0.168773	1.02454	0.886671	1.18385
392	eqtl-a-ENSG00000112902	Lung adenocarcinoma	Lung adenocarcinoma || id:ieu-a-984	|| id:eqtl-a-ENSG00000112902	Weighted median	3	-0.0103061	0.0462611	0.823706	-0.100978	0.0803658	0.989747	0.903953	1.08368
393	eqtl-a-ENSG00000112902	Lung adenocarcinoma	Lung adenocarcinoma || id:ieu-a-984	|| id:eqtl-a-ENSG00000112902	Inverse variance weighted	3	-0.0103819	0.044821	0.816826	-0.0982311	0.0774673	0.989672	0.906439	1.08055
394	eqtl-a-ENSG00000112902	Lung adenocarcinoma	Lung adenocarcinoma || id:ieu-a-984	|| id:eqtl-a-ENSG00000112902	Simple mode	3	-0.109687	0.0850282	0.326082	-0.276342	0.0569683	0.896115	0.758553	1.05862
395	eqtl-a-ENSG00000112902	Lung adenocarcinoma	Lung adenocarcinoma || id:ieu-a-984	|| id:eqtl-a-ENSG00000112902	Weighted mode	3	0.00639898	0.0447962	0.899504	-0.0814016	0.0941995	1.00642	0.921823	1.09878
396	eqtl-a-ENSG00000078081	Lung adenocarcinoma	Lung adenocarcinoma || id:ieu-a-984	|| id:eqtl-a-ENSG00000078081	MR Egger	5	0.0304332	0.306995	0.927286	-0.571276	0.632143	1.0309	0.564804	1.88164
397	eqtl-a-ENSG00000078081	Lung adenocarcinoma	Lung adenocarcinoma || id:ieu-a-984	|| id:eqtl-a-ENSG00000078081	Weighted median	5	-0.220166	0.101825	0.0306037	-0.419744	-0.0205878	0.802386	0.657215	0.979623
398	eqtl-a-ENSG00000078081	Lung adenocarcinoma	Lung adenocarcinoma || id:ieu-a-984	|| id:eqtl-a-ENSG00000078081	Inverse variance weighted	5	-0.108613	0.119787	0.364558	-0.343396	0.12617	0.897078	0.709357	1.13448
399	eqtl-a-ENSG00000078081	Lung adenocarcinoma	Lung adenocarcinoma || id:ieu-a-984	|| id:eqtl-a-ENSG00000078081	Simple mode	5	-0.205207	0.199785	0.362408	-0.596785	0.186372	0.814479	0.550579	1.20487
400	eqtl-a-ENSG00000078081	Lung adenocarcinoma	Lung adenocarcinoma || id:ieu-a-984	|| id:eqtl-a-ENSG00000078081	Weighted mode	5	-0.205207	0.115307	0.149744	-0.431208	0.0207946	0.814479	0.649724	1.02101
401	eqtl-a-ENSG00000171049	Lung adenocarcinoma	Lung adenocarcinoma || id:ieu-a-984	|| id:eqtl-a-ENSG00000171049	MR Egger	19	0.0166207	0.0405409	0.686946	-0.0628395	0.0960809	1.01676	0.939094	1.10085
402	eqtl-a-ENSG00000171049	Lung adenocarcinoma	Lung adenocarcinoma || id:ieu-a-984	|| id:eqtl-a-ENSG00000171049	Weighted median	19	-0.0198691	0.0279504	0.477164	-0.0746518	0.0349136	0.980327	0.928067	1.03553
403	eqtl-a-ENSG00000171049	Lung adenocarcinoma	Lung adenocarcinoma || id:ieu-a-984	|| id:eqtl-a-ENSG00000171049	Inverse variance weighted	19	-0.0237647	0.0234906	0.311695	-0.0698063	0.0222768	0.976515	0.932574	1.02253
404	eqtl-a-ENSG00000171049	Lung adenocarcinoma	Lung adenocarcinoma || id:ieu-a-984	|| id:eqtl-a-ENSG00000171049	Simple mode	19	-0.0195935	0.0458122	0.673949	-0.109385	0.0701984	0.980597	0.896385	1.07272
405	eqtl-a-ENSG00000171049	Lung adenocarcinoma	Lung adenocarcinoma || id:ieu-a-984	|| id:eqtl-a-ENSG00000171049	Weighted mode	19	-0.0220791	0.0283846	0.446759	-0.0777129	0.0335547	0.978163	0.92523	1.03412
406	eqtl-a-ENSG00000128268	Lung adenocarcinoma	Lung adenocarcinoma || id:ieu-a-984	|| id:eqtl-a-ENSG00000128268	MR Egger	6	-0.0976582	0.0679833	0.224213	-0.230905	0.0355891	0.906959	0.793815	1.03623
407	eqtl-a-ENSG00000128268	Lung adenocarcinoma	Lung adenocarcinoma || id:ieu-a-984	|| id:eqtl-a-ENSG00000128268	Weighted median	6	-0.0263928	0.0402017	0.511496	-0.105188	0.0524025	0.973952	0.900155	1.0538
408	eqtl-a-ENSG00000128268	Lung adenocarcinoma	Lung adenocarcinoma || id:ieu-a-984	|| id:eqtl-a-ENSG00000128268	Inverse variance weighted	6	-0.0148021	0.0392528	0.706102	-0.0917374	0.0621333	0.985307	0.912345	1.0641
409	eqtl-a-ENSG00000128268	Lung adenocarcinoma	Lung adenocarcinoma || id:ieu-a-984	|| id:eqtl-a-ENSG00000128268	Simple mode	6	0.125649	0.101071	0.268916	-0.0724501	0.323749	1.13388	0.930112	1.3823
410	eqtl-a-ENSG00000128268	Lung adenocarcinoma	Lung adenocarcinoma || id:ieu-a-984	|| id:eqtl-a-ENSG00000128268	Weighted mode	6	-0.0428503	0.0421831	0.356323	-0.125529	0.0398286	0.958055	0.88203	1.04063
411	eqtl-a-ENSG00000205038	Lung adenocarcinoma	Lung adenocarcinoma || id:ieu-a-984	|| id:eqtl-a-ENSG00000205038	MR Egger	9	0.0703115	0.105308	0.525733	-0.136092	0.276715	1.07284	0.872763	1.31879
412	eqtl-a-ENSG00000205038	Lung adenocarcinoma	Lung adenocarcinoma || id:ieu-a-984	|| id:eqtl-a-ENSG00000205038	Weighted median	9	-0.0540755	0.0534323	0.311521	-0.158803	0.0506519	0.947361	0.853165	1.05196
413	eqtl-a-ENSG00000205038	Lung adenocarcinoma	Lung adenocarcinoma || id:ieu-a-984	|| id:eqtl-a-ENSG00000205038	Inverse variance weighted	9	-0.06047	0.0409757	0.140011	-0.140782	0.0198424	0.941322	0.868678	1.02004
414	eqtl-a-ENSG00000205038	Lung adenocarcinoma	Lung adenocarcinoma || id:ieu-a-984	|| id:eqtl-a-ENSG00000205038	Simple mode	9	-0.0879714	0.0902423	0.358193	-0.264846	0.0889035	0.915787	0.767324	1.09298
415	eqtl-a-ENSG00000205038	Lung adenocarcinoma	Lung adenocarcinoma || id:ieu-a-984	|| id:eqtl-a-ENSG00000205038	Weighted mode	9	0.0221928	0.0579364	0.711657	-0.0913625	0.135748	1.02244	0.912687	1.14539
416	eqtl-a-ENSG00000179914	Lung adenocarcinoma	Lung adenocarcinoma || id:ieu-a-984	|| id:eqtl-a-ENSG00000179914	MR Egger	15	-0.112712	0.0486716	0.037544	-0.208108	-0.0173154	0.893408	0.812119	0.982834
417	eqtl-a-ENSG00000179914	Lung adenocarcinoma	Lung adenocarcinoma || id:ieu-a-984	|| id:eqtl-a-ENSG00000179914	Weighted median	15	-0.0898855	0.0349547	0.0101263	-0.158397	-0.0213743	0.914036	0.853511	0.978852
418	eqtl-a-ENSG00000179914	Lung adenocarcinoma	Lung adenocarcinoma || id:ieu-a-984	|| id:eqtl-a-ENSG00000179914	Inverse variance weighted	15	-0.0637622	0.0278778	0.0221839	-0.118403	-0.00912174	0.938228	0.888338	0.99092
419	eqtl-a-ENSG00000179914	Lung adenocarcinoma	Lung adenocarcinoma || id:ieu-a-984	|| id:eqtl-a-ENSG00000179914	Simple mode	15	-0.0823172	0.0638244	0.218039	-0.207413	0.0427787	0.92098	0.812684	1.04371
420	eqtl-a-ENSG00000179914	Lung adenocarcinoma	Lung adenocarcinoma || id:ieu-a-984	|| id:eqtl-a-ENSG00000179914	Weighted mode	15	-0.0883645	0.0328936	0.0177231	-0.152836	-0.0238931	0.915427	0.858271	0.97639
421	eqtl-a-ENSG00000243566	Lung adenocarcinoma	Lung adenocarcinoma || id:ieu-a-984	|| id:eqtl-a-ENSG00000243566	MR Egger	17	-0.0189375	0.0432889	0.668005	-0.103784	0.0659088	0.981241	0.90142	1.06813
422	eqtl-a-ENSG00000243566	Lung adenocarcinoma	Lung adenocarcinoma || id:ieu-a-984	|| id:eqtl-a-ENSG00000243566	Weighted median	17	-0.0483687	0.027947	0.0835002	-0.103145	0.00640745	0.952782	0.901996	1.00643
423	eqtl-a-ENSG00000243566	Lung adenocarcinoma	Lung adenocarcinoma || id:ieu-a-984	|| id:eqtl-a-ENSG00000243566	Inverse variance weighted	17	-0.054967	0.0221727	0.0131734	-0.0984255	-0.0115086	0.946516	0.906263	0.988557
424	eqtl-a-ENSG00000243566	Lung adenocarcinoma	Lung adenocarcinoma || id:ieu-a-984	|| id:eqtl-a-ENSG00000243566	Simple mode	17	-0.0694949	0.0440922	0.134561	-0.155916	0.0169259	0.932865	0.855631	1.01707
425	eqtl-a-ENSG00000243566	Lung adenocarcinoma	Lung adenocarcinoma || id:ieu-a-984	|| id:eqtl-a-ENSG00000243566	Weighted mode	17	-0.051014	0.0238374	0.0481011	-0.0977352	-0.00429268	0.950265	0.906889	0.995717
426	eqtl-a-ENSG00000141161	Lung adenocarcinoma	Lung adenocarcinoma || id:ieu-a-984	|| id:eqtl-a-ENSG00000141161	MR Egger	9	-0.0184324	0.053578	0.740927	-0.123445	0.0865804	0.981736	0.88387	1.09044
427	eqtl-a-ENSG00000141161	Lung adenocarcinoma	Lung adenocarcinoma || id:ieu-a-984	|| id:eqtl-a-ENSG00000141161	Weighted median	9	0.024669	0.0329113	0.45352	-0.0398372	0.0891752	1.02498	0.960946	1.09327
428	eqtl-a-ENSG00000141161	Lung adenocarcinoma	Lung adenocarcinoma || id:ieu-a-984	|| id:eqtl-a-ENSG00000141161	Inverse variance weighted	9	0.051093	0.0326154	0.117224	-0.0128331	0.115019	1.05242	0.987249	1.12189
429	eqtl-a-ENSG00000141161	Lung adenocarcinoma	Lung adenocarcinoma || id:ieu-a-984	|| id:eqtl-a-ENSG00000141161	Simple mode	9	0.0928592	0.0766405	0.260228	-0.0573562	0.243075	1.09731	0.944258	1.27516
430	eqtl-a-ENSG00000141161	Lung adenocarcinoma	Lung adenocarcinoma || id:ieu-a-984	|| id:eqtl-a-ENSG00000141161	Weighted mode	9	0.0293181	0.0342866	0.417373	-0.0378836	0.0965198	1.02975	0.962825	1.10133
431	eqtl-a-ENSG00000118777	Lung adenocarcinoma	Lung adenocarcinoma || id:ieu-a-984	|| id:eqtl-a-ENSG00000118777	MR Egger	6	0.0691744	0.0779912	0.425216	-0.0836885	0.222037	1.07162	0.919718	1.24862
432	eqtl-a-ENSG00000118777	Lung adenocarcinoma	Lung adenocarcinoma || id:ieu-a-984	|| id:eqtl-a-ENSG00000118777	Weighted median	6	0.0578425	0.0383593	0.131576	-0.0173416	0.133027	1.05955	0.982808	1.14228
433	eqtl-a-ENSG00000118777	Lung adenocarcinoma	Lung adenocarcinoma || id:ieu-a-984	|| id:eqtl-a-ENSG00000118777	Inverse variance weighted	6	0.077366	0.0446527	0.0831641	-0.0101534	0.164885	1.08044	0.989898	1.17926
434	eqtl-a-ENSG00000118777	Lung adenocarcinoma	Lung adenocarcinoma || id:ieu-a-984	|| id:eqtl-a-ENSG00000118777	Simple mode	6	0.019449	0.105737	0.861289	-0.187795	0.226693	1.01964	0.828785	1.25444
435	eqtl-a-ENSG00000118777	Lung adenocarcinoma	Lung adenocarcinoma || id:ieu-a-984	|| id:eqtl-a-ENSG00000118777	Weighted mode	6	0.0394423	0.0379646	0.346448	-0.0349683	0.113853	1.04023	0.965636	1.12059
436	eqtl-a-ENSG00000101162	Lung adenocarcinoma	Lung adenocarcinoma || id:ieu-a-984	|| id:eqtl-a-ENSG00000101162	MR Egger	15	0.106011	0.0981443	0.299706	-0.0863519	0.298374	1.11183	0.917271	1.34767
437	eqtl-a-ENSG00000101162	Lung adenocarcinoma	Lung adenocarcinoma || id:ieu-a-984	|| id:eqtl-a-ENSG00000101162	Weighted median	15	-0.00113849	0.0523698	0.982656	-0.103783	0.101506	0.998862	0.901421	1.10684
438	eqtl-a-ENSG00000101162	Lung adenocarcinoma	Lung adenocarcinoma || id:ieu-a-984	|| id:eqtl-a-ENSG00000101162	Inverse variance weighted	15	0.0135042	0.0399104	0.735091	-0.0647202	0.0917286	1.0136	0.93733	1.09607
439	eqtl-a-ENSG00000101162	Lung adenocarcinoma	Lung adenocarcinoma || id:ieu-a-984	|| id:eqtl-a-ENSG00000101162	Simple mode	15	-0.0564393	0.0835138	0.510173	-0.220126	0.107248	0.945124	0.802417	1.11321
440	eqtl-a-ENSG00000101162	Lung adenocarcinoma	Lung adenocarcinoma || id:ieu-a-984	|| id:eqtl-a-ENSG00000101162	Weighted mode	15	-0.00940858	0.0565204	0.870173	-0.120189	0.101371	0.990636	0.886753	1.10669
441	eqtl-a-ENSG00000138669	Lung adenocarcinoma	Lung adenocarcinoma || id:ieu-a-984	|| id:eqtl-a-ENSG00000138669	MR Egger	7	-0.0975006	0.0804979	0.27993	-0.255277	0.0602753	0.907102	0.774702	1.06213
442	eqtl-a-ENSG00000138669	Lung adenocarcinoma	Lung adenocarcinoma || id:ieu-a-984	|| id:eqtl-a-ENSG00000138669	Weighted median	7	-0.0448718	0.0442747	0.310828	-0.13165	0.0419066	0.95612	0.876648	1.0428
443	eqtl-a-ENSG00000138669	Lung adenocarcinoma	Lung adenocarcinoma || id:ieu-a-984	|| id:eqtl-a-ENSG00000138669	Inverse variance weighted	7	-0.0303609	0.0405334	0.453837	-0.109806	0.0490846	0.970095	0.896008	1.05031
444	eqtl-a-ENSG00000138669	Lung adenocarcinoma	Lung adenocarcinoma || id:ieu-a-984	|| id:eqtl-a-ENSG00000138669	Simple mode	7	-0.00846308	0.0789912	0.918171	-0.163286	0.14636	0.991573	0.849348	1.15761
445	eqtl-a-ENSG00000138669	Lung adenocarcinoma	Lung adenocarcinoma || id:ieu-a-984	|| id:eqtl-a-ENSG00000138669	Weighted mode	7	-0.0457236	0.0441436	0.340229	-0.132245	0.0407978	0.955306	0.876126	1.04164
446	eqtl-a-ENSG00000120645	Lung adenocarcinoma	Lung adenocarcinoma || id:ieu-a-984	|| id:eqtl-a-ENSG00000120645	MR Egger	6	0.321731	0.104199	0.0366571	0.117502	0.525961	1.37951	1.12468	1.69208
447	eqtl-a-ENSG00000120645	Lung adenocarcinoma	Lung adenocarcinoma || id:ieu-a-984	|| id:eqtl-a-ENSG00000120645	Weighted median	6	0.0960612	0.0440852	0.0293324	0.0096542	0.182468	1.10083	1.0097	1.20018
448	eqtl-a-ENSG00000120645	Lung adenocarcinoma	Lung adenocarcinoma || id:ieu-a-984	|| id:eqtl-a-ENSG00000120645	Inverse variance weighted	6	0.0722023	0.0416348	0.0828857	-0.00940186	0.153807	1.07487	0.990642	1.16627
449	eqtl-a-ENSG00000120645	Lung adenocarcinoma	Lung adenocarcinoma || id:ieu-a-984	|| id:eqtl-a-ENSG00000120645	Simple mode	6	0.12151	0.0750561	0.166388	-0.0255997	0.26862	1.1292	0.974725	1.30816
450	eqtl-a-ENSG00000120645	Lung adenocarcinoma	Lung adenocarcinoma || id:ieu-a-984	|| id:eqtl-a-ENSG00000120645	Weighted mode	6	0.12151	0.0431371	0.0372468	0.0369616	0.206059	1.1292	1.03765	1.22883
451	eqtl-a-ENSG00000161640	Lung adenocarcinoma	Lung adenocarcinoma || id:ieu-a-984	|| id:eqtl-a-ENSG00000161640	MR Egger	9	0.00443519	0.0442569	0.922984	-0.0823084	0.0911788	1.00445	0.920988	1.09546
452	eqtl-a-ENSG00000161640	Lung adenocarcinoma	Lung adenocarcinoma || id:ieu-a-984	|| id:eqtl-a-ENSG00000161640	Weighted median	9	0.0198412	0.0271644	0.465138	-0.0334011	0.0730835	1.02004	0.967151	1.07582
453	eqtl-a-ENSG00000161640	Lung adenocarcinoma	Lung adenocarcinoma || id:ieu-a-984	|| id:eqtl-a-ENSG00000161640	Inverse variance weighted	9	0.0133678	0.0229221	0.55977	-0.0315596	0.0582952	1.01346	0.968933	1.06003
454	eqtl-a-ENSG00000161640	Lung adenocarcinoma	Lung adenocarcinoma || id:ieu-a-984	|| id:eqtl-a-ENSG00000161640	Simple mode	9	0.0316501	0.0457728	0.508841	-0.0580646	0.121365	1.03216	0.943589	1.12904
455	eqtl-a-ENSG00000161640	Lung adenocarcinoma	Lung adenocarcinoma || id:ieu-a-984	|| id:eqtl-a-ENSG00000161640	Weighted mode	9	0.0162519	0.0259119	0.548007	-0.0345354	0.0670393	1.01638	0.966054	1.06934
456	eqtl-a-ENSG00000154175	Lung adenocarcinoma	Lung adenocarcinoma || id:ieu-a-984	|| id:eqtl-a-ENSG00000154175	MR Egger	3	-0.789323	0.544074	0.384202	-1.85571	0.277062	0.454152	0.156342	1.31925
457	eqtl-a-ENSG00000154175	Lung adenocarcinoma	Lung adenocarcinoma || id:ieu-a-984	|| id:eqtl-a-ENSG00000154175	Weighted median	3	0.0523239	0.097817	0.592707	-0.139397	0.244045	1.05372	0.869882	1.2764
458	eqtl-a-ENSG00000154175	Lung adenocarcinoma	Lung adenocarcinoma || id:ieu-a-984	|| id:eqtl-a-ENSG00000154175	Inverse variance weighted	3	0.109768	0.099439	0.269651	-0.085133	0.304668	1.11602	0.91839	1.35617
459	eqtl-a-ENSG00000154175	Lung adenocarcinoma	Lung adenocarcinoma || id:ieu-a-984	|| id:eqtl-a-ENSG00000154175	Simple mode	3	0.041663	0.125431	0.77135	-0.204182	0.287508	1.04254	0.815314	1.3331
460	eqtl-a-ENSG00000154175	Lung adenocarcinoma	Lung adenocarcinoma || id:ieu-a-984	|| id:eqtl-a-ENSG00000154175	Weighted mode	3	0.041663	0.102914	0.724794	-0.160049	0.243375	1.04254	0.852102	1.27555
461	eqtl-a-ENSG00000159723	Lung adenocarcinoma	Lung adenocarcinoma || id:ieu-a-984	|| id:eqtl-a-ENSG00000159723	MR Egger	13	-0.138463	0.211948	0.52699	-0.55388	0.276954	0.870696	0.574716	1.31911
462	eqtl-a-ENSG00000159723	Lung adenocarcinoma	Lung adenocarcinoma || id:ieu-a-984	|| id:eqtl-a-ENSG00000159723	Weighted median	13	-0.118171	0.0370254	0.00141474	-0.190741	-0.0456015	0.888544	0.826347	0.955423
463	eqtl-a-ENSG00000159723	Lung adenocarcinoma	Lung adenocarcinoma || id:ieu-a-984	|| id:eqtl-a-ENSG00000159723	Inverse variance weighted	13	-0.121426	0.0306838	7.57954e-05	-0.181566	-0.0612853	0.885657	0.833963	0.940555
464	eqtl-a-ENSG00000159723	Lung adenocarcinoma	Lung adenocarcinoma || id:ieu-a-984	|| id:eqtl-a-ENSG00000159723	Simple mode	13	-0.11206	0.0518496	0.0515961	-0.213685	-0.0104346	0.893991	0.807603	0.98962
465	eqtl-a-ENSG00000159723	Lung adenocarcinoma	Lung adenocarcinoma || id:ieu-a-984	|| id:eqtl-a-ENSG00000159723	Weighted mode	13	-0.109748	0.056262	0.0748429	-0.220021	0.000526049	0.89606	0.802502	1.00053
466	eqtl-a-ENSG00000180871	Lung adenocarcinoma	Lung adenocarcinoma || id:ieu-a-984	|| id:eqtl-a-ENSG00000180871	MR Egger	7	-0.108538	0.0643469	0.152455	-0.234658	0.0175815	0.897144	0.790841	1.01774
467	eqtl-a-ENSG00000180871	Lung adenocarcinoma	Lung adenocarcinoma || id:ieu-a-984	|| id:eqtl-a-ENSG00000180871	Weighted median	7	-0.0456846	0.0464594	0.325449	-0.136745	0.0453759	0.955343	0.872193	1.04642
468	eqtl-a-ENSG00000180871	Lung adenocarcinoma	Lung adenocarcinoma || id:ieu-a-984	|| id:eqtl-a-ENSG00000180871	Inverse variance weighted	7	-0.0264211	0.0353196	0.454425	-0.0956475	0.0428053	0.973925	0.908784	1.04373
469	eqtl-a-ENSG00000180871	Lung adenocarcinoma	Lung adenocarcinoma || id:ieu-a-984	|| id:eqtl-a-ENSG00000180871	Simple mode	7	0.0645743	0.0928372	0.512727	-0.117387	0.246535	1.0667	0.889241	1.27958
470	eqtl-a-ENSG00000180871	Lung adenocarcinoma	Lung adenocarcinoma || id:ieu-a-984	|| id:eqtl-a-ENSG00000180871	Weighted mode	7	-0.0940771	0.0477884	0.0965351	-0.187742	-0.000411778	0.910213	0.828828	0.999588
471	eqtl-a-ENSG00000178878	Lung adenocarcinoma	Lung adenocarcinoma || id:ieu-a-984	|| id:eqtl-a-ENSG00000178878	MR Egger	5	-0.125787	0.108857	0.33155	-0.339146	0.0875722	0.881803	0.712378	1.09152
472	eqtl-a-ENSG00000178878	Lung adenocarcinoma	Lung adenocarcinoma || id:ieu-a-984	|| id:eqtl-a-ENSG00000178878	Weighted median	5	-0.0175191	0.037301	0.638591	-0.0906291	0.0555908	0.982633	0.913356	1.05717
473	eqtl-a-ENSG00000178878	Lung adenocarcinoma	Lung adenocarcinoma || id:ieu-a-984	|| id:eqtl-a-ENSG00000178878	Inverse variance weighted	5	-0.0352621	0.0507904	0.487515	-0.134811	0.0642871	0.965352	0.873881	1.0664
474	eqtl-a-ENSG00000178878	Lung adenocarcinoma	Lung adenocarcinoma || id:ieu-a-984	|| id:eqtl-a-ENSG00000178878	Simple mode	5	-0.092702	0.0777833	0.299216	-0.245157	0.0597533	0.911465	0.782581	1.06157
475	eqtl-a-ENSG00000178878	Lung adenocarcinoma	Lung adenocarcinoma || id:ieu-a-984	|| id:eqtl-a-ENSG00000178878	Weighted mode	5	-0.0209952	0.0387297	0.616539	-0.0969054	0.0549149	0.979224	0.907642	1.05645
476	eqtl-a-ENSG00000135218	Lung adenocarcinoma	Lung adenocarcinoma || id:ieu-a-984	|| id:eqtl-a-ENSG00000135218	MR Egger	29	-0.0356653	0.0290698	0.230457	-0.0926421	0.0213115	0.964963	0.91152	1.02154
477	eqtl-a-ENSG00000135218	Lung adenocarcinoma	Lung adenocarcinoma || id:ieu-a-984	|| id:eqtl-a-ENSG00000135218	Weighted median	29	-0.00892897	0.0244751	0.715247	-0.0569002	0.0390422	0.991111	0.944688	1.03981
478	eqtl-a-ENSG00000135218	Lung adenocarcinoma	Lung adenocarcinoma || id:ieu-a-984	|| id:eqtl-a-ENSG00000135218	Inverse variance weighted	29	-0.00565103	0.0186707	0.762142	-0.0422456	0.0309435	0.994365	0.958634	1.03143
479	eqtl-a-ENSG00000135218	Lung adenocarcinoma	Lung adenocarcinoma || id:ieu-a-984	|| id:eqtl-a-ENSG00000135218	Simple mode	29	-0.000332032	0.0594242	0.995581	-0.116803	0.116139	0.999668	0.88976	1.12315
480	eqtl-a-ENSG00000135218	Lung adenocarcinoma	Lung adenocarcinoma || id:ieu-a-984	|| id:eqtl-a-ENSG00000135218	Weighted mode	29	-0.00688515	0.0218438	0.754947	-0.049699	0.0359287	0.993138	0.951516	1.03658
481	eqtl-a-ENSG00000149403	Lung adenocarcinoma	Lung adenocarcinoma || id:ieu-a-984	|| id:eqtl-a-ENSG00000149403	MR Egger	7	-0.00228762	0.0776798	0.977646	-0.15454	0.149965	0.997715	0.856809	1.16179
482	eqtl-a-ENSG00000149403	Lung adenocarcinoma	Lung adenocarcinoma || id:ieu-a-984	|| id:eqtl-a-ENSG00000149403	Weighted median	7	0.00793027	0.0379683	0.834553	-0.0664876	0.0823481	1.00796	0.935675	1.08583
483	eqtl-a-ENSG00000149403	Lung adenocarcinoma	Lung adenocarcinoma || id:ieu-a-984	|| id:eqtl-a-ENSG00000149403	Inverse variance weighted	7	0.0162311	0.0361424	0.653369	-0.0546081	0.0870702	1.01636	0.946856	1.09097
484	eqtl-a-ENSG00000149403	Lung adenocarcinoma	Lung adenocarcinoma || id:ieu-a-984	|| id:eqtl-a-ENSG00000149403	Simple mode	7	0.0428804	0.0571916	0.481748	-0.0692152	0.154976	1.04381	0.933126	1.16763
485	eqtl-a-ENSG00000149403	Lung adenocarcinoma	Lung adenocarcinoma || id:ieu-a-984	|| id:eqtl-a-ENSG00000149403	Weighted mode	7	0.0144934	0.0425591	0.745051	-0.0689224	0.0979091	1.0146	0.933399	1.10286
486	eqtl-a-ENSG00000105427	Lung adenocarcinoma	Lung adenocarcinoma || id:ieu-a-984	|| id:eqtl-a-ENSG00000105427	MR Egger	4	-0.154039	0.287682	0.645909	-0.717895	0.409816	0.857238	0.487778	1.50654
487	eqtl-a-ENSG00000105427	Lung adenocarcinoma	Lung adenocarcinoma || id:ieu-a-984	|| id:eqtl-a-ENSG00000105427	Weighted median	4	-0.213088	0.104021	0.0405097	-0.416969	-0.00920728	0.808085	0.659041	0.990835
488	eqtl-a-ENSG00000105427	Lung adenocarcinoma	Lung adenocarcinoma || id:ieu-a-984	|| id:eqtl-a-ENSG00000105427	Inverse variance weighted	4	-0.212819	0.0852632	0.0125592	-0.379935	-0.0457036	0.808302	0.683906	0.955325
489	eqtl-a-ENSG00000105427	Lung adenocarcinoma	Lung adenocarcinoma || id:ieu-a-984	|| id:eqtl-a-ENSG00000105427	Simple mode	4	-0.202041	0.131973	0.223289	-0.460708	0.0566256	0.817061	0.630837	1.05826
490	eqtl-a-ENSG00000105427	Lung adenocarcinoma	Lung adenocarcinoma || id:ieu-a-984	|| id:eqtl-a-ENSG00000105427	Weighted mode	4	-0.211943	0.130058	0.201676	-0.466856	0.0429708	0.809011	0.62697	1.04391
491	eqtl-a-ENSG00000092295	Lung adenocarcinoma	Lung adenocarcinoma || id:ieu-a-984	|| id:eqtl-a-ENSG00000092295	MR Egger	3	0.0273333	0.0786384	0.787039	-0.126798	0.181465	1.02771	0.880912	1.19897
492	eqtl-a-ENSG00000092295	Lung adenocarcinoma	Lung adenocarcinoma || id:ieu-a-984	|| id:eqtl-a-ENSG00000092295	Weighted median	3	-0.0302562	0.040468	0.454667	-0.109574	0.0490612	0.970197	0.896216	1.05028
493	eqtl-a-ENSG00000092295	Lung adenocarcinoma	Lung adenocarcinoma || id:ieu-a-984	|| id:eqtl-a-ENSG00000092295	Inverse variance weighted	3	-0.0359633	0.0399749	0.368308	-0.114314	0.0423875	0.964676	0.891978	1.0433
494	eqtl-a-ENSG00000092295	Lung adenocarcinoma	Lung adenocarcinoma || id:ieu-a-984	|| id:eqtl-a-ENSG00000092295	Simple mode	3	-0.0396346	0.0572869	0.56055	-0.151917	0.0726478	0.961141	0.85906	1.07535
495	eqtl-a-ENSG00000092295	Lung adenocarcinoma	Lung adenocarcinoma || id:ieu-a-984	|| id:eqtl-a-ENSG00000092295	Weighted mode	3	-0.0264842	0.0451517	0.616886	-0.114982	0.0620133	0.973863	0.891383	1.06398
496	eqtl-a-ENSG00000206177	Lung adenocarcinoma	Lung adenocarcinoma || id:ieu-a-984	|| id:eqtl-a-ENSG00000206177	MR Egger	30	0.115931	0.0614843	0.069773	-0.00457848	0.23644	1.12292	0.995432	1.26673
497	eqtl-a-ENSG00000206177	Lung adenocarcinoma	Lung adenocarcinoma || id:ieu-a-984	|| id:eqtl-a-ENSG00000206177	Weighted median	30	0.0116137	0.0415734	0.779974	-0.0698702	0.0930976	1.01168	0.932515	1.09757
498	eqtl-a-ENSG00000206177	Lung adenocarcinoma	Lung adenocarcinoma || id:ieu-a-984	|| id:eqtl-a-ENSG00000206177	Inverse variance weighted	30	0.0272754	0.0335068	0.41563	-0.0383979	0.0929487	1.02765	0.96233	1.09741
499	eqtl-a-ENSG00000206177	Lung adenocarcinoma	Lung adenocarcinoma || id:ieu-a-984	|| id:eqtl-a-ENSG00000206177	Simple mode	30	-0.0441263	0.0893759	0.625226	-0.219303	0.131051	0.956833	0.803078	1.14003
500	eqtl-a-ENSG00000206177	Lung adenocarcinoma	Lung adenocarcinoma || id:ieu-a-984	|| id:eqtl-a-ENSG00000206177	Weighted mode	30	0.0801056	0.0573778	0.173278	-0.0323549	0.192566	1.0834	0.968163	1.21236
501	eqtl-a-ENSG00000136826	Lung adenocarcinoma	Lung adenocarcinoma || id:ieu-a-984	|| id:eqtl-a-ENSG00000136826	MR Egger	4	0.11918	0.553277	0.84942	-0.965243	1.2036	1.12657	0.380891	3.3321
502	eqtl-a-ENSG00000136826	Lung adenocarcinoma	Lung adenocarcinoma || id:ieu-a-984	|| id:eqtl-a-ENSG00000136826	Weighted median	4	0.11552	0.140092	0.409599	-0.159061	0.3901	1.12246	0.852945	1.47713
503	eqtl-a-ENSG00000136826	Lung adenocarcinoma	Lung adenocarcinoma || id:ieu-a-984	|| id:eqtl-a-ENSG00000136826	Inverse variance weighted	4	0.0635484	0.123743	0.607567	-0.178989	0.306085	1.06561	0.836115	1.3581
504	eqtl-a-ENSG00000136826	Lung adenocarcinoma	Lung adenocarcinoma || id:ieu-a-984	|| id:eqtl-a-ENSG00000136826	Simple mode	4	0.169024	0.207104	0.474201	-0.2369	0.574948	1.18415	0.78907	1.77704
505	eqtl-a-ENSG00000136826	Lung adenocarcinoma	Lung adenocarcinoma || id:ieu-a-984	|| id:eqtl-a-ENSG00000136826	Weighted mode	4	0.160813	0.198038	0.476223	-0.227342	0.548969	1.17447	0.796648	1.73147
506	eqtl-a-ENSG00000141469	Lung adenocarcinoma	Lung adenocarcinoma || id:ieu-a-984	|| id:eqtl-a-ENSG00000141469	MR Egger	17	-0.144371	0.0515843	0.0134941	-0.245476	-0.0432656	0.865567	0.782332	0.957657
507	eqtl-a-ENSG00000141469	Lung adenocarcinoma	Lung adenocarcinoma || id:ieu-a-984	|| id:eqtl-a-ENSG00000141469	Weighted median	17	-0.0750409	0.0420276	0.0741778	-0.157415	0.00733319	0.927706	0.854349	1.00736
508	eqtl-a-ENSG00000141469	Lung adenocarcinoma	Lung adenocarcinoma || id:ieu-a-984	|| id:eqtl-a-ENSG00000141469	Inverse variance weighted	17	-0.0484513	0.0309003	0.116884	-0.109016	0.0121133	0.952704	0.896716	1.01219
509	eqtl-a-ENSG00000141469	Lung adenocarcinoma	Lung adenocarcinoma || id:ieu-a-984	|| id:eqtl-a-ENSG00000141469	Simple mode	17	0.0597908	0.0786923	0.458421	-0.0944461	0.214028	1.06161	0.909877	1.23866
510	eqtl-a-ENSG00000141469	Lung adenocarcinoma	Lung adenocarcinoma || id:ieu-a-984	|| id:eqtl-a-ENSG00000141469	Weighted mode	17	-0.0940659	0.0442987	0.0496619	-0.180891	-0.00724041	0.910223	0.834526	0.992786
511	eqtl-a-ENSG00000163827	Lung adenocarcinoma	Lung adenocarcinoma || id:ieu-a-984	|| id:eqtl-a-ENSG00000163827	MR Egger	4	0.621824	1.60077	0.735132	-2.51568	3.75933	1.86232	0.0808082	42.9195
512	eqtl-a-ENSG00000163827	Lung adenocarcinoma	Lung adenocarcinoma || id:ieu-a-984	|| id:eqtl-a-ENSG00000163827	Weighted median	4	0.141012	0.134719	0.295233	-0.123038	0.405061	1.15144	0.88423	1.49939
513	eqtl-a-ENSG00000163827	Lung adenocarcinoma	Lung adenocarcinoma || id:ieu-a-984	|| id:eqtl-a-ENSG00000163827	Inverse variance weighted	4	0.297657	0.207023	0.150492	-0.108109	0.703423	1.3467	0.89753	2.02066
514	eqtl-a-ENSG00000163827	Lung adenocarcinoma	Lung adenocarcinoma || id:ieu-a-984	|| id:eqtl-a-ENSG00000163827	Simple mode	4	0.172197	0.180447	0.410343	-0.181479	0.525873	1.18791	0.834036	1.69193
515	eqtl-a-ENSG00000163827	Lung adenocarcinoma	Lung adenocarcinoma || id:ieu-a-984	|| id:eqtl-a-ENSG00000163827	Weighted mode	4	0.113221	0.132235	0.454826	-0.145961	0.372402	1.11988	0.864192	1.45122
516	eqtl-a-ENSG00000188015	Lung adenocarcinoma	Lung adenocarcinoma || id:ieu-a-984	|| id:eqtl-a-ENSG00000188015	MR Egger	6	0.0930901	0.490082	0.8586	-0.867472	1.05365	1.09756	0.420012	2.86811
517	eqtl-a-ENSG00000188015	Lung adenocarcinoma	Lung adenocarcinoma || id:ieu-a-984	|| id:eqtl-a-ENSG00000188015	Weighted median	6	0.0233512	0.122104	0.848337	-0.215972	0.262675	1.02363	0.805757	1.3004
518	eqtl-a-ENSG00000188015	Lung adenocarcinoma	Lung adenocarcinoma || id:ieu-a-984	|| id:eqtl-a-ENSG00000188015	Inverse variance weighted	6	0.028501	0.109179	0.794056	-0.18549	0.242492	1.02891	0.830697	1.27442
519	eqtl-a-ENSG00000188015	Lung adenocarcinoma	Lung adenocarcinoma || id:ieu-a-984	|| id:eqtl-a-ENSG00000188015	Simple mode	6	-0.0317494	0.167003	0.856699	-0.359076	0.295577	0.968749	0.698321	1.3439
520	eqtl-a-ENSG00000188015	Lung adenocarcinoma	Lung adenocarcinoma || id:ieu-a-984	|| id:eqtl-a-ENSG00000188015	Weighted mode	6	-0.00199158	0.168075	0.991004	-0.331419	0.327436	0.99801	0.717904	1.38741
521	eqtl-a-ENSG00000164530	Lung adenocarcinoma	Lung adenocarcinoma || id:ieu-a-984	|| id:eqtl-a-ENSG00000164530	MR Egger	24	0.0301108	0.0344302	0.391269	-0.0373724	0.097594	1.03057	0.963317	1.10252
522	eqtl-a-ENSG00000164530	Lung adenocarcinoma	Lung adenocarcinoma || id:ieu-a-984	|| id:eqtl-a-ENSG00000164530	Weighted median	24	0.025436	0.027902	0.36197	-0.029252	0.0801239	1.02576	0.971172	1.08342
523	eqtl-a-ENSG00000164530	Lung adenocarcinoma	Lung adenocarcinoma || id:ieu-a-984	|| id:eqtl-a-ENSG00000164530	Inverse variance weighted	24	0.0423464	0.0221437	0.0558321	-0.00105529	0.0857481	1.04326	0.998945	1.08953
524	eqtl-a-ENSG00000164530	Lung adenocarcinoma	Lung adenocarcinoma || id:ieu-a-984	|| id:eqtl-a-ENSG00000164530	Simple mode	24	0.0719402	0.0527898	0.186151	-0.0315279	0.175408	1.07459	0.968964	1.19173
525	eqtl-a-ENSG00000164530	Lung adenocarcinoma	Lung adenocarcinoma || id:ieu-a-984	|| id:eqtl-a-ENSG00000164530	Weighted mode	24	0.0240436	0.0271039	0.384214	-0.0290801	0.0771673	1.02433	0.971339	1.08022
526	eqtl-a-ENSG00000211445	Lung adenocarcinoma	Lung adenocarcinoma || id:ieu-a-984	|| id:eqtl-a-ENSG00000211445	MR Egger	10	-0.0573893	0.0853246	0.520152	-0.224625	0.109847	0.944226	0.798815	1.11611
527	eqtl-a-ENSG00000211445	Lung adenocarcinoma	Lung adenocarcinoma || id:ieu-a-984	|| id:eqtl-a-ENSG00000211445	Weighted median	10	-0.00359625	0.0412864	0.930588	-0.0845176	0.0773251	0.99641	0.918955	1.08039
528	eqtl-a-ENSG00000211445	Lung adenocarcinoma	Lung adenocarcinoma || id:ieu-a-984	|| id:eqtl-a-ENSG00000211445	Inverse variance weighted	10	0.0128418	0.0344093	0.708994	-0.0546005	0.0802841	1.01292	0.946863	1.08359
529	eqtl-a-ENSG00000211445	Lung adenocarcinoma	Lung adenocarcinoma || id:ieu-a-984	|| id:eqtl-a-ENSG00000211445	Simple mode	10	0.0391913	0.0663644	0.569355	-0.090883	0.169266	1.03997	0.913125	1.18443
530	eqtl-a-ENSG00000211445	Lung adenocarcinoma	Lung adenocarcinoma || id:ieu-a-984	|| id:eqtl-a-ENSG00000211445	Weighted mode	10	-0.000539293	0.0410755	0.989811	-0.0810472	0.0799686	0.999461	0.92215	1.08325
531	eqtl-a-ENSG00000043591	Lung adenocarcinoma	Lung adenocarcinoma || id:ieu-a-984	|| id:eqtl-a-ENSG00000043591	MR Egger	4	0.0351572	0.180998	0.863929	-0.3196	0.389914	1.03578	0.72644	1.47685
532	eqtl-a-ENSG00000043591	Lung adenocarcinoma	Lung adenocarcinoma || id:ieu-a-984	|| id:eqtl-a-ENSG00000043591	Weighted median	4	-0.0835709	0.0522551	0.109757	-0.185991	0.0188491	0.919826	0.830281	1.01903
533	eqtl-a-ENSG00000043591	Lung adenocarcinoma	Lung adenocarcinoma || id:ieu-a-984	|| id:eqtl-a-ENSG00000043591	Inverse variance weighted	4	-0.140992	0.0576079	0.014387	-0.253904	-0.0280811	0.868496	0.775766	0.97231
534	eqtl-a-ENSG00000043591	Lung adenocarcinoma	Lung adenocarcinoma || id:ieu-a-984	|| id:eqtl-a-ENSG00000043591	Simple mode	4	-0.0954465	0.115817	0.470286	-0.322448	0.131555	0.908967	0.724373	1.1406
535	eqtl-a-ENSG00000043591	Lung adenocarcinoma	Lung adenocarcinoma || id:ieu-a-984	|| id:eqtl-a-ENSG00000043591	Weighted mode	4	-0.0839689	0.0557268	0.228959	-0.193193	0.0252555	0.91946	0.824323	1.02558
536	eqtl-a-ENSG00000168477	Lung adenocarcinoma	Lung adenocarcinoma || id:ieu-a-984	|| id:eqtl-a-ENSG00000168477	MR Egger	7	-0.123143	0.125559	0.371755	-0.369239	0.122953	0.884138	0.69126	1.13083
537	eqtl-a-ENSG00000168477	Lung adenocarcinoma	Lung adenocarcinoma || id:ieu-a-984	|| id:eqtl-a-ENSG00000168477	Weighted median	7	-0.129895	0.0425026	0.00224186	-0.2132	-0.04659	0.878188	0.807994	0.954479
538	eqtl-a-ENSG00000168477	Lung adenocarcinoma	Lung adenocarcinoma || id:ieu-a-984	|| id:eqtl-a-ENSG00000168477	Inverse variance weighted	7	-0.150053	0.034022	1.03144e-05	-0.216737	-0.0833701	0.860662	0.805142	0.920011
539	eqtl-a-ENSG00000168477	Lung adenocarcinoma	Lung adenocarcinoma || id:ieu-a-984	|| id:eqtl-a-ENSG00000168477	Simple mode	7	-0.102474	0.0528342	0.100507	-0.206029	0.00108128	0.902602	0.81381	1.00108
540	eqtl-a-ENSG00000168477	Lung adenocarcinoma	Lung adenocarcinoma || id:ieu-a-984	|| id:eqtl-a-ENSG00000168477	Weighted mode	7	-0.128239	0.044252	0.0274085	-0.214973	-0.0415051	0.879643	0.806563	0.959344
541	eqtl-a-ENSG00000111052	Lung adenocarcinoma	Lung adenocarcinoma || id:ieu-a-984	|| id:eqtl-a-ENSG00000111052	MR Egger	25	-0.0480107	0.0380739	0.219954	-0.122635	0.026614	0.953124	0.884586	1.02697
542	eqtl-a-ENSG00000111052	Lung adenocarcinoma	Lung adenocarcinoma || id:ieu-a-984	|| id:eqtl-a-ENSG00000111052	Weighted median	25	-0.0673411	0.031492	0.0324876	-0.129065	-0.00561686	0.934876	0.878917	0.994399
543	eqtl-a-ENSG00000111052	Lung adenocarcinoma	Lung adenocarcinoma || id:ieu-a-984	|| id:eqtl-a-ENSG00000111052	Inverse variance weighted	25	-0.0279693	0.0232648	0.229281	-0.0735684	0.0176298	0.972418	0.929073	1.01779
544	eqtl-a-ENSG00000111052	Lung adenocarcinoma	Lung adenocarcinoma || id:ieu-a-984	|| id:eqtl-a-ENSG00000111052	Simple mode	25	0.00873667	0.0544854	0.873948	-0.0980548	0.115528	1.00877	0.906599	1.12247
545	eqtl-a-ENSG00000111052	Lung adenocarcinoma	Lung adenocarcinoma || id:ieu-a-984	|| id:eqtl-a-ENSG00000111052	Weighted mode	25	-0.0467888	0.0256583	0.0807016	-0.097079	0.00350145	0.954289	0.907484	1.00351
546	eqtl-a-ENSG00000154188	Lung adenocarcinoma	Lung adenocarcinoma || id:ieu-a-984	|| id:eqtl-a-ENSG00000154188	MR Egger	20	0.0204004	0.0425877	0.637691	-0.0630715	0.103872	1.02061	0.938876	1.10946
547	eqtl-a-ENSG00000154188	Lung adenocarcinoma	Lung adenocarcinoma || id:ieu-a-984	|| id:eqtl-a-ENSG00000154188	Weighted median	20	-0.0464364	0.0262137	0.0764849	-0.0978153	0.00494244	0.954625	0.906816	1.00495
548	eqtl-a-ENSG00000154188	Lung adenocarcinoma	Lung adenocarcinoma || id:ieu-a-984	|| id:eqtl-a-ENSG00000154188	Inverse variance weighted	20	-0.08042	0.0247575	0.00116093	-0.128945	-0.0318953	0.922729	0.879023	0.968608
549	eqtl-a-ENSG00000154188	Lung adenocarcinoma	Lung adenocarcinoma || id:ieu-a-984	|| id:eqtl-a-ENSG00000154188	Simple mode	20	-0.045515	0.0472579	0.347586	-0.138141	0.0471105	0.955505	0.870976	1.04824
550	eqtl-a-ENSG00000154188	Lung adenocarcinoma	Lung adenocarcinoma || id:ieu-a-984	|| id:eqtl-a-ENSG00000154188	Weighted mode	20	-0.053123	0.0219458	0.025677	-0.0961368	-0.0101092	0.948263	0.90834	0.989942
551	eqtl-a-ENSG00000197766	Lung adenocarcinoma	Lung adenocarcinoma || id:ieu-a-984	|| id:eqtl-a-ENSG00000197766	MR Egger	10	0.00442954	0.0307514	0.889028	-0.0558431	0.0647022	1.00444	0.945687	1.06684
552	eqtl-a-ENSG00000197766	Lung adenocarcinoma	Lung adenocarcinoma || id:ieu-a-984	|| id:eqtl-a-ENSG00000197766	Weighted median	10	-0.00172329	0.0271938	0.949471	-0.0550231	0.0515765	0.998278	0.946463	1.05293
553	eqtl-a-ENSG00000197766	Lung adenocarcinoma	Lung adenocarcinoma || id:ieu-a-984	|| id:eqtl-a-ENSG00000197766	Inverse variance weighted	10	-0.00504694	0.0229345	0.825826	-0.0499986	0.0399047	0.994966	0.951231	1.04071
554	eqtl-a-ENSG00000197766	Lung adenocarcinoma	Lung adenocarcinoma || id:ieu-a-984	|| id:eqtl-a-ENSG00000197766	Simple mode	10	0.0291329	0.0635516	0.657524	-0.0954283	0.153694	1.02956	0.908984	1.16613
555	eqtl-a-ENSG00000197766	Lung adenocarcinoma	Lung adenocarcinoma || id:ieu-a-984	|| id:eqtl-a-ENSG00000197766	Weighted mode	10	-0.00134354	0.024901	0.95815	-0.0501494	0.0474623	0.998657	0.951087	1.04861
556	eqtl-a-ENSG00000166823	Lung adenocarcinoma	Lung adenocarcinoma || id:ieu-a-984	|| id:eqtl-a-ENSG00000166823	MR Egger	5	-0.289191	0.323875	0.437694	-0.923986	0.345604	0.748869	0.396934	1.41284
557	eqtl-a-ENSG00000166823	Lung adenocarcinoma	Lung adenocarcinoma || id:ieu-a-984	|| id:eqtl-a-ENSG00000166823	Weighted median	5	-0.0172126	0.0451316	0.702917	-0.105671	0.0712454	0.982935	0.899721	1.07384
558	eqtl-a-ENSG00000166823	Lung adenocarcinoma	Lung adenocarcinoma || id:ieu-a-984	|| id:eqtl-a-ENSG00000166823	Inverse variance weighted	5	-0.02085	0.0407365	0.608773	-0.100694	0.0589935	0.979366	0.90421	1.06077
559	eqtl-a-ENSG00000166823	Lung adenocarcinoma	Lung adenocarcinoma || id:ieu-a-984	|| id:eqtl-a-ENSG00000166823	Simple mode	5	0.0913933	0.0818856	0.326896	-0.0691025	0.251889	1.0957	0.933231	1.28645
560	eqtl-a-ENSG00000166823	Lung adenocarcinoma	Lung adenocarcinoma || id:ieu-a-984	|| id:eqtl-a-ENSG00000166823	Weighted mode	5	-0.0171774	0.0433228	0.711981	-0.10209	0.0677354	0.982969	0.902948	1.07008
561	eqtl-a-ENSG00000138722	Lung adenocarcinoma	Lung adenocarcinoma || id:ieu-a-984	|| id:eqtl-a-ENSG00000138722	MR Egger	18	-0.00255025	0.0378705	0.947144	-0.0767765	0.071676	0.997453	0.926097	1.07431
562	eqtl-a-ENSG00000138722	Lung adenocarcinoma	Lung adenocarcinoma || id:ieu-a-984	|| id:eqtl-a-ENSG00000138722	Weighted median	18	0.00930858	0.0269471	0.729764	-0.0435078	0.0621249	1.00935	0.957425	1.0641
563	eqtl-a-ENSG00000138722	Lung adenocarcinoma	Lung adenocarcinoma || id:ieu-a-984	|| id:eqtl-a-ENSG00000138722	Inverse variance weighted	18	0.0127456	0.0241245	0.597273	-0.0345384	0.0600295	1.01283	0.966051	1.06187
564	eqtl-a-ENSG00000138722	Lung adenocarcinoma	Lung adenocarcinoma || id:ieu-a-984	|| id:eqtl-a-ENSG00000138722	Simple mode	18	-0.0314838	0.0683559	0.650932	-0.165461	0.102494	0.969007	0.847503	1.10793
565	eqtl-a-ENSG00000138722	Lung adenocarcinoma	Lung adenocarcinoma || id:ieu-a-984	|| id:eqtl-a-ENSG00000138722	Weighted mode	18	0.00719497	0.0297328	0.811685	-0.0510814	0.0654713	1.00722	0.950201	1.06766
566	eqtl-a-ENSG00000152580	Lung adenocarcinoma	Lung adenocarcinoma || id:ieu-a-984	|| id:eqtl-a-ENSG00000152580	MR Egger	3	-0.1366	0.160216	0.550544	-0.450623	0.177422	0.872319	0.637231	1.19414
567	eqtl-a-ENSG00000152580	Lung adenocarcinoma	Lung adenocarcinoma || id:ieu-a-984	|| id:eqtl-a-ENSG00000152580	Weighted median	3	-0.139054	0.0735924	0.058822	-0.283295	0.00518671	0.870181	0.753297	1.0052
568	eqtl-a-ENSG00000152580	Lung adenocarcinoma	Lung adenocarcinoma || id:ieu-a-984	|| id:eqtl-a-ENSG00000152580	Inverse variance weighted	3	-0.139842	0.0694787	0.044143	-0.27602	-0.00366364	0.869496	0.758798	0.996343
569	eqtl-a-ENSG00000152580	Lung adenocarcinoma	Lung adenocarcinoma || id:ieu-a-984	|| id:eqtl-a-ENSG00000152580	Simple mode	3	-0.130181	0.100545	0.32473	-0.327249	0.0668865	0.877936	0.720904	1.06917
570	eqtl-a-ENSG00000152580	Lung adenocarcinoma	Lung adenocarcinoma || id:ieu-a-984	|| id:eqtl-a-ENSG00000152580	Weighted mode	3	-0.138108	0.0760144	0.210879	-0.287096	0.0108806	0.871005	0.75044	1.01094
571	eqtl-a-ENSG00000163464	Lung adenocarcinoma	Lung adenocarcinoma || id:ieu-a-984	|| id:eqtl-a-ENSG00000163464	MR Egger	10	-0.0513913	0.0409001	0.244379	-0.131555	0.0287728	0.949907	0.876731	1.02919
572	eqtl-a-ENSG00000163464	Lung adenocarcinoma	Lung adenocarcinoma || id:ieu-a-984	|| id:eqtl-a-ENSG00000163464	Weighted median	10	-0.0428319	0.0269731	0.112298	-0.0956992	0.0100354	0.958072	0.908737	1.01009
573	eqtl-a-ENSG00000163464	Lung adenocarcinoma	Lung adenocarcinoma || id:ieu-a-984	|| id:eqtl-a-ENSG00000163464	Inverse variance weighted	10	-0.026619	0.021662	0.219133	-0.0690764	0.0158384	0.973732	0.933255	1.01596
574	eqtl-a-ENSG00000163464	Lung adenocarcinoma	Lung adenocarcinoma || id:ieu-a-984	|| id:eqtl-a-ENSG00000163464	Simple mode	10	-0.0130388	0.0459362	0.782951	-0.103074	0.0769961	0.987046	0.902061	1.08004
575	eqtl-a-ENSG00000163464	Lung adenocarcinoma	Lung adenocarcinoma || id:ieu-a-984	|| id:eqtl-a-ENSG00000163464	Weighted mode	10	-0.0328223	0.0239989	0.204596	-0.0798601	0.0142156	0.967711	0.923245	1.01432
576	eqtl-a-ENSG00000158764	Lung adenocarcinoma	Lung adenocarcinoma || id:ieu-a-984	|| id:eqtl-a-ENSG00000158764	MR Egger	4	-0.0144091	0.32945	0.969088	-0.66013	0.631312	0.985694	0.516784	1.88008
577	eqtl-a-ENSG00000158764	Lung adenocarcinoma	Lung adenocarcinoma || id:ieu-a-984	|| id:eqtl-a-ENSG00000158764	Weighted median	4	0.0897684	0.0670545	0.180656	-0.0416584	0.221195	1.09392	0.959197	1.24757
578	eqtl-a-ENSG00000158764	Lung adenocarcinoma	Lung adenocarcinoma || id:ieu-a-984	|| id:eqtl-a-ENSG00000158764	Inverse variance weighted	4	0.100639	0.0726963	0.166244	-0.041846	0.243124	1.10588	0.959017	1.27523
579	eqtl-a-ENSG00000158764	Lung adenocarcinoma	Lung adenocarcinoma || id:ieu-a-984	|| id:eqtl-a-ENSG00000158764	Simple mode	4	0.121426	0.135542	0.436343	-0.144236	0.387087	1.12911	0.865684	1.47269
580	eqtl-a-ENSG00000158764	Lung adenocarcinoma	Lung adenocarcinoma || id:ieu-a-984	|| id:eqtl-a-ENSG00000158764	Weighted mode	4	0.0781664	0.0778446	0.389296	-0.0744089	0.230742	1.0813	0.928292	1.25953
581	eqtl-a-ENSG00000163492	Lung adenocarcinoma	Lung adenocarcinoma || id:ieu-a-984	|| id:eqtl-a-ENSG00000163492	MR Egger	5	-0.520438	0.273641	0.153344	-1.05678	0.0158986	0.59426	0.347575	1.01603
582	eqtl-a-ENSG00000163492	Lung adenocarcinoma	Lung adenocarcinoma || id:ieu-a-984	|| id:eqtl-a-ENSG00000163492	Weighted median	5	-0.15526	0.0682988	0.0230116	-0.289125	-0.021394	0.856193	0.748918	0.978833
583	eqtl-a-ENSG00000163492	Lung adenocarcinoma	Lung adenocarcinoma || id:ieu-a-984	|| id:eqtl-a-ENSG00000163492	Inverse variance weighted	5	-0.114725	0.0787198	0.14501	-0.269016	0.0395656	0.891611	0.764131	1.04036
584	eqtl-a-ENSG00000163492	Lung adenocarcinoma	Lung adenocarcinoma || id:ieu-a-984	|| id:eqtl-a-ENSG00000163492	Simple mode	5	-0.164814	0.0812876	0.112527	-0.324138	-0.00549028	0.848052	0.723151	0.994525
585	eqtl-a-ENSG00000163492	Lung adenocarcinoma	Lung adenocarcinoma || id:ieu-a-984	|| id:eqtl-a-ENSG00000163492	Weighted mode	5	-0.157248	0.0782093	0.11472	-0.310538	-0.00395759	0.854492	0.733052	0.99605
586	eqtl-a-ENSG00000173114	Lung adenocarcinoma	Lung adenocarcinoma || id:ieu-a-984	|| id:eqtl-a-ENSG00000173114	MR Egger	11	0.355374	0.19575	0.102843	-0.0282955	0.739044	1.42671	0.972101	2.09393
587	eqtl-a-ENSG00000173114	Lung adenocarcinoma	Lung adenocarcinoma || id:ieu-a-984	|| id:eqtl-a-ENSG00000173114	Weighted median	11	0.0845292	0.0843973	0.316554	-0.0808894	0.249948	1.0882	0.922296	1.28396
588	eqtl-a-ENSG00000173114	Lung adenocarcinoma	Lung adenocarcinoma || id:ieu-a-984	|| id:eqtl-a-ENSG00000173114	Inverse variance weighted	11	-0.0234592	0.105324	0.823743	-0.229894	0.182976	0.976814	0.794618	1.20079
589	eqtl-a-ENSG00000173114	Lung adenocarcinoma	Lung adenocarcinoma || id:ieu-a-984	|| id:eqtl-a-ENSG00000173114	Simple mode	11	0.151868	0.118687	0.229587	-0.0807587	0.384496	1.16401	0.922416	1.46887
590	eqtl-a-ENSG00000173114	Lung adenocarcinoma	Lung adenocarcinoma || id:ieu-a-984	|| id:eqtl-a-ENSG00000173114	Weighted mode	11	0.114399	0.116048	0.347487	-0.113056	0.341854	1.1212	0.893101	1.40756
591	eqtl-a-ENSG00000107242	Lung adenocarcinoma	Lung adenocarcinoma || id:ieu-a-984	|| id:eqtl-a-ENSG00000107242	MR Egger	5	0.134052	0.31918	0.70276	-0.491541	0.759645	1.14345	0.611683	2.13752
592	eqtl-a-ENSG00000107242	Lung adenocarcinoma	Lung adenocarcinoma || id:ieu-a-984	|| id:eqtl-a-ENSG00000107242	Weighted median	5	0.021867	0.0684093	0.749234	-0.112215	0.155949	1.02211	0.893852	1.16877
593	eqtl-a-ENSG00000107242	Lung adenocarcinoma	Lung adenocarcinoma || id:ieu-a-984	|| id:eqtl-a-ENSG00000107242	Inverse variance weighted	5	0.00351255	0.0737715	0.962024	-0.14108	0.148105	1.00352	0.86842	1.15963
594	eqtl-a-ENSG00000107242	Lung adenocarcinoma	Lung adenocarcinoma || id:ieu-a-984	|| id:eqtl-a-ENSG00000107242	Simple mode	5	0.0198356	0.0843243	0.825582	-0.14544	0.185111	1.02003	0.864642	1.20335
595	eqtl-a-ENSG00000107242	Lung adenocarcinoma	Lung adenocarcinoma || id:ieu-a-984	|| id:eqtl-a-ENSG00000107242	Weighted mode	5	0.0198356	0.0665827	0.780605	-0.110666	0.150338	1.02003	0.895237	1.16223
596	eqtl-a-ENSG00000197415	Lung adenocarcinoma	Lung adenocarcinoma || id:ieu-a-984	|| id:eqtl-a-ENSG00000197415	MR Egger	8	0.0297643	0.176558	0.871665	-0.316289	0.375817	1.03021	0.728849	1.45618
597	eqtl-a-ENSG00000197415	Lung adenocarcinoma	Lung adenocarcinoma || id:ieu-a-984	|| id:eqtl-a-ENSG00000197415	Weighted median	8	-0.0556823	0.0651607	0.392807	-0.183397	0.0720328	0.94584	0.832437	1.07469
598	eqtl-a-ENSG00000197415	Lung adenocarcinoma	Lung adenocarcinoma || id:ieu-a-984	|| id:eqtl-a-ENSG00000197415	Inverse variance weighted	8	-0.0274926	0.0519666	0.596775	-0.129347	0.0743619	0.972882	0.878669	1.0772
599	eqtl-a-ENSG00000197415	Lung adenocarcinoma	Lung adenocarcinoma || id:ieu-a-984	|| id:eqtl-a-ENSG00000197415	Simple mode	8	-0.0961223	0.101294	0.374253	-0.294659	0.102415	0.908353	0.744785	1.10784
600	eqtl-a-ENSG00000197415	Lung adenocarcinoma	Lung adenocarcinoma || id:ieu-a-984	|| id:eqtl-a-ENSG00000197415	Weighted mode	8	-0.0348126	0.0779725	0.66874	-0.187639	0.118013	0.965786	0.828914	1.12526
601	eqtl-a-ENSG00000004799	Lung adenocarcinoma	Lung adenocarcinoma || id:ieu-a-984	|| id:eqtl-a-ENSG00000004799	MR Egger	11	-0.0259713	0.113673	0.824385	-0.248771	0.196828	0.974363	0.779759	1.21753
602	eqtl-a-ENSG00000004799	Lung adenocarcinoma	Lung adenocarcinoma || id:ieu-a-984	|| id:eqtl-a-ENSG00000004799	Weighted median	11	-0.0470927	0.0545911	0.388334	-0.154091	0.0599059	0.953999	0.857194	1.06174
603	eqtl-a-ENSG00000004799	Lung adenocarcinoma	Lung adenocarcinoma || id:ieu-a-984	|| id:eqtl-a-ENSG00000004799	Inverse variance weighted	11	-0.0337934	0.0437258	0.439612	-0.119496	0.0519092	0.966771	0.887368	1.05328
604	eqtl-a-ENSG00000004799	Lung adenocarcinoma	Lung adenocarcinoma || id:ieu-a-984	|| id:eqtl-a-ENSG00000004799	Simple mode	11	-0.0585935	0.089035	0.525337	-0.233102	0.115915	0.94309	0.792073	1.1229
605	eqtl-a-ENSG00000004799	Lung adenocarcinoma	Lung adenocarcinoma || id:ieu-a-984	|| id:eqtl-a-ENSG00000004799	Weighted mode	11	-0.0485369	0.0614862	0.448193	-0.16905	0.071976	0.952622	0.844467	1.07463
606	eqtl-a-ENSG00000047617	Lung adenocarcinoma	Lung adenocarcinoma || id:ieu-a-984	|| id:eqtl-a-ENSG00000047617	MR Egger	3	1.07726	1.01159	0.479994	-0.905465	3.05998	2.93661	0.404354	21.3271
607	eqtl-a-ENSG00000047617	Lung adenocarcinoma	Lung adenocarcinoma || id:ieu-a-984	|| id:eqtl-a-ENSG00000047617	Weighted median	3	0.152755	0.135622	0.260027	-0.113064	0.418575	1.16504	0.893093	1.51979
608	eqtl-a-ENSG00000047617	Lung adenocarcinoma	Lung adenocarcinoma || id:ieu-a-984	|| id:eqtl-a-ENSG00000047617	Inverse variance weighted	3	0.173003	0.118408	0.143993	-0.0590755	0.405082	1.18887	0.942636	1.49943
609	eqtl-a-ENSG00000047617	Lung adenocarcinoma	Lung adenocarcinoma || id:ieu-a-984	|| id:eqtl-a-ENSG00000047617	Simple mode	3	0.148858	0.178297	0.491624	-0.200604	0.49832	1.16051	0.818237	1.64595
610	eqtl-a-ENSG00000047617	Lung adenocarcinoma	Lung adenocarcinoma || id:ieu-a-984	|| id:eqtl-a-ENSG00000047617	Weighted mode	3	0.132931	0.169719	0.515506	-0.199718	0.46558	1.14217	0.818962	1.59294
611	eqtl-a-ENSG00000186188	Lung adenocarcinoma	Lung adenocarcinoma || id:ieu-a-984	|| id:eqtl-a-ENSG00000186188	MR Egger	6	-0.149184	0.0866067	0.160073	-0.318933	0.0205656	0.861411	0.726924	1.02078
612	eqtl-a-ENSG00000186188	Lung adenocarcinoma	Lung adenocarcinoma || id:ieu-a-984	|| id:eqtl-a-ENSG00000186188	Weighted median	6	-0.0185338	0.0501658	0.711791	-0.116859	0.0797912	0.981637	0.889711	1.08306
613	eqtl-a-ENSG00000186188	Lung adenocarcinoma	Lung adenocarcinoma || id:ieu-a-984	|| id:eqtl-a-ENSG00000186188	Inverse variance weighted	6	0.0048616	0.0498578	0.922322	-0.0928596	0.102583	1.00487	0.911321	1.10803
614	eqtl-a-ENSG00000186188	Lung adenocarcinoma	Lung adenocarcinoma || id:ieu-a-984	|| id:eqtl-a-ENSG00000186188	Simple mode	6	0.0804747	0.119712	0.531241	-0.154161	0.31511	1.0838	0.857134	1.37041
615	eqtl-a-ENSG00000186188	Lung adenocarcinoma	Lung adenocarcinoma || id:ieu-a-984	|| id:eqtl-a-ENSG00000186188	Weighted mode	6	-0.0159113	0.0500781	0.76353	-0.114064	0.0822417	0.984215	0.892201	1.08572
616	eqtl-a-ENSG00000160867	Lung adenocarcinoma	Lung adenocarcinoma || id:ieu-a-984	|| id:eqtl-a-ENSG00000160867	MR Egger	4	-0.133058	0.203453	0.580262	-0.531826	0.26571	0.875414	0.587531	1.30436
617	eqtl-a-ENSG00000160867	Lung adenocarcinoma	Lung adenocarcinoma || id:ieu-a-984	|| id:eqtl-a-ENSG00000160867	Weighted median	4	-0.0142952	0.0708674	0.840137	-0.153195	0.124605	0.985806	0.857962	1.1327
618	eqtl-a-ENSG00000160867	Lung adenocarcinoma	Lung adenocarcinoma || id:ieu-a-984	|| id:eqtl-a-ENSG00000160867	Inverse variance weighted	4	-0.0203319	0.0614877	0.740897	-0.140848	0.100184	0.979873	0.868622	1.10537
619	eqtl-a-ENSG00000160867	Lung adenocarcinoma	Lung adenocarcinoma || id:ieu-a-984	|| id:eqtl-a-ENSG00000160867	Simple mode	4	0.0144855	0.0929013	0.885995	-0.167601	0.196572	1.01459	0.845691	1.21722
620	eqtl-a-ENSG00000160867	Lung adenocarcinoma	Lung adenocarcinoma || id:ieu-a-984	|| id:eqtl-a-ENSG00000160867	Weighted mode	4	-0.0596847	0.0847386	0.531974	-0.225772	0.106403	0.942061	0.7979	1.11227
621	eqtl-a-ENSG00000137857	Lung adenocarcinoma	Lung adenocarcinoma || id:ieu-a-984	|| id:eqtl-a-ENSG00000137857	MR Egger	5	0.0655808	0.28615	0.833462	-0.495272	0.626434	1.06778	0.609405	1.87093
622	eqtl-a-ENSG00000137857	Lung adenocarcinoma	Lung adenocarcinoma || id:ieu-a-984	|| id:eqtl-a-ENSG00000137857	Weighted median	5	-0.0565975	0.0718898	0.431117	-0.197502	0.0843066	0.944974	0.820779	1.08796
623	eqtl-a-ENSG00000137857	Lung adenocarcinoma	Lung adenocarcinoma || id:ieu-a-984	|| id:eqtl-a-ENSG00000137857	Inverse variance weighted	5	-0.0623623	0.0613763	0.309598	-0.18266	0.0579352	0.939542	0.833052	1.05965
624	eqtl-a-ENSG00000137857	Lung adenocarcinoma	Lung adenocarcinoma || id:ieu-a-984	|| id:eqtl-a-ENSG00000137857	Simple mode	5	-0.0634051	0.0921758	0.529346	-0.24407	0.117259	0.938563	0.783433	1.12441
625	eqtl-a-ENSG00000137857	Lung adenocarcinoma	Lung adenocarcinoma || id:ieu-a-984	|| id:eqtl-a-ENSG00000137857	Weighted mode	5	-0.0550269	0.0838316	0.547411	-0.219337	0.109283	0.94646	0.803051	1.11548
626	eqtl-a-ENSG00000169704	Lung adenocarcinoma	Lung adenocarcinoma || id:ieu-a-984	|| id:eqtl-a-ENSG00000169704	MR Egger	13	0.0212194	0.0494531	0.676147	-0.0757087	0.118147	1.02145	0.927086	1.12541
627	eqtl-a-ENSG00000169704	Lung adenocarcinoma	Lung adenocarcinoma || id:ieu-a-984	|| id:eqtl-a-ENSG00000169704	Weighted median	13	6.84983e-05	0.0333593	0.998362	-0.0653158	0.0654528	1.00007	0.936772	1.06764
628	eqtl-a-ENSG00000169704	Lung adenocarcinoma	Lung adenocarcinoma || id:ieu-a-984	|| id:eqtl-a-ENSG00000169704	Inverse variance weighted	13	-0.0158184	0.0306018	0.605218	-0.0757979	0.0441611	0.984306	0.927004	1.04515
629	eqtl-a-ENSG00000169704	Lung adenocarcinoma	Lung adenocarcinoma || id:ieu-a-984	|| id:eqtl-a-ENSG00000169704	Simple mode	13	-0.0534006	0.0845469	0.539488	-0.219112	0.112311	0.948	0.803231	1.11886
630	eqtl-a-ENSG00000169704	Lung adenocarcinoma	Lung adenocarcinoma || id:ieu-a-984	|| id:eqtl-a-ENSG00000169704	Weighted mode	13	0.00614823	0.0344311	0.861257	-0.0613366	0.0736331	1.00617	0.940507	1.07641
631	eqtl-a-ENSG00000198948	Lung adenocarcinoma	Lung adenocarcinoma || id:ieu-a-984	|| id:eqtl-a-ENSG00000198948	MR Egger	11	-0.0867534	0.0883069	0.35157	-0.259835	0.0863283	0.916903	0.771179	1.09016
632	eqtl-a-ENSG00000198948	Lung adenocarcinoma	Lung adenocarcinoma || id:ieu-a-984	|| id:eqtl-a-ENSG00000198948	Weighted median	11	-0.0517703	0.0543593	0.340908	-0.158314	0.0547739	0.949547	0.853581	1.0563
633	eqtl-a-ENSG00000198948	Lung adenocarcinoma	Lung adenocarcinoma || id:ieu-a-984	|| id:eqtl-a-ENSG00000198948	Inverse variance weighted	11	-0.0400394	0.0439707	0.36251	-0.126222	0.0461432	0.960752	0.881419	1.04722
634	eqtl-a-ENSG00000198948	Lung adenocarcinoma	Lung adenocarcinoma || id:ieu-a-984	|| id:eqtl-a-ENSG00000198948	Simple mode	11	-0.0337342	0.0806342	0.684526	-0.191777	0.124309	0.966828	0.825491	1.13237
635	eqtl-a-ENSG00000198948	Lung adenocarcinoma	Lung adenocarcinoma || id:ieu-a-984	|| id:eqtl-a-ENSG00000198948	Weighted mode	11	-0.0493391	0.0579449	0.414427	-0.162911	0.064233	0.951858	0.849667	1.06634
636	eqtl-a-ENSG00000078401	Lung adenocarcinoma	Lung adenocarcinoma || id:ieu-a-984	|| id:eqtl-a-ENSG00000078401	MR Egger	3	0.537367	1.04319	0.697178	-1.50728	2.58201	1.71149	0.221512	13.2237
637	eqtl-a-ENSG00000078401	Lung adenocarcinoma	Lung adenocarcinoma || id:ieu-a-984	|| id:eqtl-a-ENSG00000078401	Weighted median	3	-0.0298969	0.0726789	0.680811	-0.172348	0.112554	0.970546	0.841687	1.11913
638	eqtl-a-ENSG00000078401	Lung adenocarcinoma	Lung adenocarcinoma || id:ieu-a-984	|| id:eqtl-a-ENSG00000078401	Inverse variance weighted	3	-0.0168862	0.0664132	0.799296	-0.147056	0.113284	0.983256	0.863246	1.11995
639	eqtl-a-ENSG00000078401	Lung adenocarcinoma	Lung adenocarcinoma || id:ieu-a-984	|| id:eqtl-a-ENSG00000078401	Simple mode	3	-0.0373408	0.088986	0.715538	-0.211753	0.137072	0.963348	0.809164	1.14691
640	eqtl-a-ENSG00000078401	Lung adenocarcinoma	Lung adenocarcinoma || id:ieu-a-984	|| id:eqtl-a-ENSG00000078401	Weighted mode	3	-0.0340521	0.0866173	0.732169	-0.203822	0.135718	0.966521	0.815608	1.14536
641	eqtl-a-ENSG00000177324	Lung adenocarcinoma	Lung adenocarcinoma || id:ieu-a-984	|| id:eqtl-a-ENSG00000177324	MR Egger	3	0.496371	0.517174	0.513065	-0.51729	1.51003	1.64275	0.596134	4.52688
642	eqtl-a-ENSG00000177324	Lung adenocarcinoma	Lung adenocarcinoma || id:ieu-a-984	|| id:eqtl-a-ENSG00000177324	Weighted median	3	-0.0201787	0.097776	0.836497	-0.21182	0.171462	0.980024	0.809111	1.18704
643	eqtl-a-ENSG00000177324	Lung adenocarcinoma	Lung adenocarcinoma || id:ieu-a-984	|| id:eqtl-a-ENSG00000177324	Inverse variance weighted	3	-0.0286347	0.092854	0.75779	-0.210628	0.153359	0.971771	0.810075	1.16574
644	eqtl-a-ENSG00000177324	Lung adenocarcinoma	Lung adenocarcinoma || id:ieu-a-984	|| id:eqtl-a-ENSG00000177324	Simple mode	3	-0.121295	0.145493	0.492169	-0.406463	0.163872	0.885772	0.666002	1.17806
645	eqtl-a-ENSG00000177324	Lung adenocarcinoma	Lung adenocarcinoma || id:ieu-a-984	|| id:eqtl-a-ENSG00000177324	Weighted mode	3	0.0205038	0.112751	0.872462	-0.200488	0.241496	1.02072	0.818331	1.27315
646	eqtl-a-ENSG00000137441	Lung adenocarcinoma	Lung adenocarcinoma || id:ieu-a-984	|| id:eqtl-a-ENSG00000137441	MR Egger	7	0.100987	0.0650104	0.18104	-0.0264338	0.228407	1.10626	0.973912	1.2566
647	eqtl-a-ENSG00000137441	Lung adenocarcinoma	Lung adenocarcinoma || id:ieu-a-984	|| id:eqtl-a-ENSG00000137441	Weighted median	7	0.03728	0.0406762	0.359402	-0.0424454	0.117005	1.03798	0.958443	1.12413
648	eqtl-a-ENSG00000137441	Lung adenocarcinoma	Lung adenocarcinoma || id:ieu-a-984	|| id:eqtl-a-ENSG00000137441	Inverse variance weighted	7	0.0378351	0.0360665	0.29416	-0.0328552	0.108525	1.03856	0.967679	1.11463
649	eqtl-a-ENSG00000137441	Lung adenocarcinoma	Lung adenocarcinoma || id:ieu-a-984	|| id:eqtl-a-ENSG00000137441	Simple mode	7	-0.0625906	0.0849575	0.489081	-0.229107	0.103926	0.939328	0.795243	1.10952
650	eqtl-a-ENSG00000137441	Lung adenocarcinoma	Lung adenocarcinoma || id:ieu-a-984	|| id:eqtl-a-ENSG00000137441	Weighted mode	7	0.072153	0.0454106	0.163183	-0.0168517	0.161158	1.07482	0.983289	1.17487
651	eqtl-a-ENSG00000164850	Lung adenocarcinoma	Lung adenocarcinoma || id:ieu-a-984	|| id:eqtl-a-ENSG00000164850	MR Egger	13	0.013794	0.0926271	0.884312	-0.167755	0.195343	1.01389	0.845561	1.21573
652	eqtl-a-ENSG00000164850	Lung adenocarcinoma	Lung adenocarcinoma || id:ieu-a-984	|| id:eqtl-a-ENSG00000164850	Weighted median	13	0.0139666	0.0457247	0.760025	-0.0756539	0.103587	1.01406	0.927137	1.10914
653	eqtl-a-ENSG00000164850	Lung adenocarcinoma	Lung adenocarcinoma || id:ieu-a-984	|| id:eqtl-a-ENSG00000164850	Inverse variance weighted	13	0.0493761	0.0482625	0.306273	-0.0452184	0.143971	1.05062	0.955789	1.15485
654	eqtl-a-ENSG00000164850	Lung adenocarcinoma	Lung adenocarcinoma || id:ieu-a-984	|| id:eqtl-a-ENSG00000164850	Simple mode	13	0.0762799	0.0961383	0.442929	-0.112151	0.264711	1.07926	0.893909	1.30305
655	eqtl-a-ENSG00000164850	Lung adenocarcinoma	Lung adenocarcinoma || id:ieu-a-984	|| id:eqtl-a-ENSG00000164850	Weighted mode	13	0.0160171	0.0441256	0.722927	-0.0704692	0.102503	1.01615	0.931956	1.10794
656	eqtl-a-ENSG00000167210	Lung adenocarcinoma	Lung adenocarcinoma || id:ieu-a-984	|| id:eqtl-a-ENSG00000167210	MR Egger	10	0.0151071	0.0379083	0.700674	-0.0591931	0.0894073	1.01522	0.942525	1.09353
657	eqtl-a-ENSG00000167210	Lung adenocarcinoma	Lung adenocarcinoma || id:ieu-a-984	|| id:eqtl-a-ENSG00000167210	Weighted median	10	0.0393503	0.0258329	0.127693	-0.0112822	0.0899828	1.04013	0.988781	1.09416
658	eqtl-a-ENSG00000167210	Lung adenocarcinoma	Lung adenocarcinoma || id:ieu-a-984	|| id:eqtl-a-ENSG00000167210	Inverse variance weighted	10	0.0527038	0.0239165	0.0275486	0.00582738	0.0995802	1.05412	1.00584	1.10471
659	eqtl-a-ENSG00000167210	Lung adenocarcinoma	Lung adenocarcinoma || id:ieu-a-984	|| id:eqtl-a-ENSG00000167210	Simple mode	10	0.131039	0.0988569	0.217653	-0.0627209	0.324798	1.14001	0.939206	1.38375
660	eqtl-a-ENSG00000167210	Lung adenocarcinoma	Lung adenocarcinoma || id:ieu-a-984	|| id:eqtl-a-ENSG00000167210	Weighted mode	10	0.0373217	0.0266242	0.194508	-0.0148617	0.089505	1.03803	0.985248	1.09363
661	eqtl-a-ENSG00000159339	Lung adenocarcinoma	Lung adenocarcinoma || id:ieu-a-984	|| id:eqtl-a-ENSG00000159339	MR Egger	14	-0.0528877	0.0418364	0.230178	-0.134887	0.0291116	0.948487	0.873815	1.02954
662	eqtl-a-ENSG00000159339	Lung adenocarcinoma	Lung adenocarcinoma || id:ieu-a-984	|| id:eqtl-a-ENSG00000159339	Weighted median	14	-0.0374441	0.0328268	0.254013	-0.101785	0.0268964	0.963248	0.903224	1.02726
663	eqtl-a-ENSG00000159339	Lung adenocarcinoma	Lung adenocarcinoma || id:ieu-a-984	|| id:eqtl-a-ENSG00000159339	Inverse variance weighted	14	-0.0113204	0.0278898	0.684818	-0.0659845	0.0433437	0.988743	0.936145	1.0443
664	eqtl-a-ENSG00000159339	Lung adenocarcinoma	Lung adenocarcinoma || id:ieu-a-984	|| id:eqtl-a-ENSG00000159339	Simple mode	14	-0.0246816	0.0489219	0.622345	-0.120569	0.0712053	0.97562	0.886416	1.0738
665	eqtl-a-ENSG00000159339	Lung adenocarcinoma	Lung adenocarcinoma || id:ieu-a-984	|| id:eqtl-a-ENSG00000159339	Weighted mode	14	-0.0311249	0.0260681	0.253817	-0.0822185	0.0199686	0.969354	0.921071	1.02017
666	eqtl-a-ENSG00000125740	Lung adenocarcinoma	Lung adenocarcinoma || id:ieu-a-984	|| id:eqtl-a-ENSG00000125740	MR Egger	5	-1.60714	1.35935	0.322264	-4.27146	1.05718	0.20046	0.0139613	2.87825
667	eqtl-a-ENSG00000125740	Lung adenocarcinoma	Lung adenocarcinoma || id:ieu-a-984	|| id:eqtl-a-ENSG00000125740	Weighted median	5	0.290966	0.120532	0.0157779	0.0547231	0.527209	1.33772	1.05625	1.6942
668	eqtl-a-ENSG00000125740	Lung adenocarcinoma	Lung adenocarcinoma || id:ieu-a-984	|| id:eqtl-a-ENSG00000125740	Inverse variance weighted	5	0.2067	0.0927777	0.0258869	0.0248556	0.388544	1.22961	1.02517	1.47483
669	eqtl-a-ENSG00000125740	Lung adenocarcinoma	Lung adenocarcinoma || id:ieu-a-984	|| id:eqtl-a-ENSG00000125740	Simple mode	5	0.317432	0.175792	0.145267	-0.0271202	0.661985	1.3736	0.973244	1.93864
670	eqtl-a-ENSG00000125740	Lung adenocarcinoma	Lung adenocarcinoma || id:ieu-a-984	|| id:eqtl-a-ENSG00000125740	Weighted mode	5	0.315977	0.181812	0.157219	-0.0403756	0.672329	1.3716	0.960429	1.95879
671	eqtl-a-ENSG00000103034	Lung adenocarcinoma	Lung adenocarcinoma || id:ieu-a-984	|| id:eqtl-a-ENSG00000103034	MR Egger	4	-0.133559	0.31659	0.714142	-0.754076	0.486958	0.874976	0.470445	1.62736
672	eqtl-a-ENSG00000103034	Lung adenocarcinoma	Lung adenocarcinoma || id:ieu-a-984	|| id:eqtl-a-ENSG00000103034	Weighted median	4	0.100377	0.0780784	0.198586	-0.0526569	0.25341	1.10559	0.948705	1.28841
673	eqtl-a-ENSG00000103034	Lung adenocarcinoma	Lung adenocarcinoma || id:ieu-a-984	|| id:eqtl-a-ENSG00000103034	Inverse variance weighted	4	0.136769	0.0655261	0.0368664	0.00833754	0.2652	1.14656	1.00837	1.30369
674	eqtl-a-ENSG00000103034	Lung adenocarcinoma	Lung adenocarcinoma || id:ieu-a-984	|| id:eqtl-a-ENSG00000103034	Simple mode	4	0.226513	0.109078	0.12942	0.0127203	0.440305	1.25422	1.0128	1.55318
675	eqtl-a-ENSG00000103034	Lung adenocarcinoma	Lung adenocarcinoma || id:ieu-a-984	|| id:eqtl-a-ENSG00000103034	Weighted mode	4	0.08543	0.089176	0.408739	-0.089355	0.260215	1.08919	0.914521	1.29721
676	eqtl-a-ENSG00000132329	Lung adenocarcinoma	Lung adenocarcinoma || id:ieu-a-984	|| id:eqtl-a-ENSG00000132329	MR Egger	6	-0.0517803	0.126362	0.702964	-0.299449	0.195888	0.949537	0.741227	1.21639
677	eqtl-a-ENSG00000132329	Lung adenocarcinoma	Lung adenocarcinoma || id:ieu-a-984	|| id:eqtl-a-ENSG00000132329	Weighted median	6	-0.00544951	0.0503522	0.913815	-0.10414	0.0932408	0.994565	0.901099	1.09773
678	eqtl-a-ENSG00000132329	Lung adenocarcinoma	Lung adenocarcinoma || id:ieu-a-984	|| id:eqtl-a-ENSG00000132329	Inverse variance weighted	6	0.0203194	0.0569711	0.721345	-0.0913439	0.131983	1.02053	0.912704	1.14109
679	eqtl-a-ENSG00000132329	Lung adenocarcinoma	Lung adenocarcinoma || id:ieu-a-984	|| id:eqtl-a-ENSG00000132329	Simple mode	6	0.032584	0.109567	0.778128	-0.182167	0.247335	1.03312	0.833463	1.28061
680	eqtl-a-ENSG00000132329	Lung adenocarcinoma	Lung adenocarcinoma || id:ieu-a-984	|| id:eqtl-a-ENSG00000132329	Weighted mode	6	-0.0145431	0.0515525	0.789169	-0.115586	0.0864997	0.985562	0.890844	1.09035
681	eqtl-a-ENSG00000116690	Lung adenocarcinoma	Lung adenocarcinoma || id:ieu-a-984	|| id:eqtl-a-ENSG00000116690	MR Egger	8	-0.0459608	0.0684939	0.527181	-0.180209	0.0882873	0.955079	0.835096	1.0923
682	eqtl-a-ENSG00000116690	Lung adenocarcinoma	Lung adenocarcinoma || id:ieu-a-984	|| id:eqtl-a-ENSG00000116690	Weighted median	8	0.0382007	0.0372583	0.305225	-0.0348256	0.111227	1.03894	0.965774	1.11765
683	eqtl-a-ENSG00000116690	Lung adenocarcinoma	Lung adenocarcinoma || id:ieu-a-984	|| id:eqtl-a-ENSG00000116690	Inverse variance weighted	8	0.0348716	0.0295785	0.238419	-0.0231024	0.0928455	1.03549	0.977162	1.09729
684	eqtl-a-ENSG00000116690	Lung adenocarcinoma	Lung adenocarcinoma || id:ieu-a-984	|| id:eqtl-a-ENSG00000116690	Simple mode	8	0.0339393	0.0527723	0.540629	-0.0694944	0.137373	1.03452	0.932865	1.14726
685	eqtl-a-ENSG00000116690	Lung adenocarcinoma	Lung adenocarcinoma || id:ieu-a-984	|| id:eqtl-a-ENSG00000116690	Weighted mode	8	0.0262529	0.0447593	0.575933	-0.0614752	0.113981	1.0266	0.940376	1.12073
686	eqtl-a-ENSG00000010379	Lung adenocarcinoma	Lung adenocarcinoma || id:ieu-a-984	|| id:eqtl-a-ENSG00000010379	MR Egger	3	1.05396	1.1658	0.532048	-1.23101	3.33893	2.869	0.291998	28.189
687	eqtl-a-ENSG00000010379	Lung adenocarcinoma	Lung adenocarcinoma || id:ieu-a-984	|| id:eqtl-a-ENSG00000010379	Weighted median	3	0.203466	0.196521	0.30051	-0.181716	0.588648	1.22564	0.833838	1.80155
688	eqtl-a-ENSG00000010379	Lung adenocarcinoma	Lung adenocarcinoma || id:ieu-a-984	|| id:eqtl-a-ENSG00000010379	Inverse variance weighted	3	0.218922	0.168867	0.194834	-0.112058	0.549902	1.24473	0.893992	1.73308
689	eqtl-a-ENSG00000010379	Lung adenocarcinoma	Lung adenocarcinoma || id:ieu-a-984	|| id:eqtl-a-ENSG00000010379	Simple mode	3	0.267196	0.244048	0.387836	-0.211138	0.74553	1.3063	0.809662	2.10756
690	eqtl-a-ENSG00000010379	Lung adenocarcinoma	Lung adenocarcinoma || id:ieu-a-984	|| id:eqtl-a-ENSG00000010379	Weighted mode	3	0.167537	0.229387	0.541132	-0.28206	0.617135	1.18239	0.754228	1.85361
691	eqtl-a-ENSG00000196565	Lung adenocarcinoma	Lung adenocarcinoma || id:ieu-a-984	|| id:eqtl-a-ENSG00000196565	MR Egger	8	-0.0448929	0.0479675	0.385445	-0.138909	0.0491234	0.9561	0.870307	1.05035
692	eqtl-a-ENSG00000196565	Lung adenocarcinoma	Lung adenocarcinoma || id:ieu-a-984	|| id:eqtl-a-ENSG00000196565	Weighted median	8	-0.00439666	0.0323308	0.891829	-0.067765	0.0589717	0.995613	0.93448	1.06075
693	eqtl-a-ENSG00000196565	Lung adenocarcinoma	Lung adenocarcinoma || id:ieu-a-984	|| id:eqtl-a-ENSG00000196565	Inverse variance weighted	8	-0.0277061	0.0245112	0.258331	-0.0757479	0.0203358	0.972674	0.92705	1.02054
694	eqtl-a-ENSG00000196565	Lung adenocarcinoma	Lung adenocarcinoma || id:ieu-a-984	|| id:eqtl-a-ENSG00000196565	Simple mode	8	0.00211005	0.0501329	0.967603	-0.0961504	0.10037	1.00211	0.908327	1.10558
695	eqtl-a-ENSG00000196565	Lung adenocarcinoma	Lung adenocarcinoma || id:ieu-a-984	|| id:eqtl-a-ENSG00000196565	Weighted mode	8	0.00542918	0.0381255	0.890774	-0.0692968	0.0801552	1.00544	0.93305	1.08346
696	eqtl-a-ENSG00000196549	Lung adenocarcinoma	Lung adenocarcinoma || id:ieu-a-984	|| id:eqtl-a-ENSG00000196549	MR Egger	14	-0.115895	0.0956212	0.248829	-0.303312	0.0715227	0.890569	0.738368	1.07414
697	eqtl-a-ENSG00000196549	Lung adenocarcinoma	Lung adenocarcinoma || id:ieu-a-984	|| id:eqtl-a-ENSG00000196549	Weighted median	14	-0.0556888	0.0537699	0.300349	-0.161078	0.0497003	0.945833	0.851226	1.05096
698	eqtl-a-ENSG00000196549	Lung adenocarcinoma	Lung adenocarcinoma || id:ieu-a-984	|| id:eqtl-a-ENSG00000196549	Inverse variance weighted	14	-0.0326137	0.0397036	0.411401	-0.110433	0.0452053	0.967912	0.895447	1.04624
699	eqtl-a-ENSG00000196549	Lung adenocarcinoma	Lung adenocarcinoma || id:ieu-a-984	|| id:eqtl-a-ENSG00000196549	Simple mode	14	-0.0474649	0.0856202	0.588739	-0.21528	0.120351	0.953644	0.806315	1.12789
700	eqtl-a-ENSG00000196549	Lung adenocarcinoma	Lung adenocarcinoma || id:ieu-a-984	|| id:eqtl-a-ENSG00000196549	Weighted mode	14	-0.0545339	0.090453	0.556949	-0.231822	0.122754	0.946926	0.793087	1.13061
701	eqtl-a-ENSG00000120903	Lung adenocarcinoma	Lung adenocarcinoma || id:ieu-a-984	|| id:eqtl-a-ENSG00000120903	MR Egger	4	-0.385868	0.570655	0.568637	-1.50435	0.732616	0.67986	0.222161	2.08052
702	eqtl-a-ENSG00000120903	Lung adenocarcinoma	Lung adenocarcinoma || id:ieu-a-984	|| id:eqtl-a-ENSG00000120903	Weighted median	4	0.025462	0.105063	0.808508	-0.180461	0.231385	1.02579	0.834885	1.26034
703	eqtl-a-ENSG00000120903	Lung adenocarcinoma	Lung adenocarcinoma || id:ieu-a-984	|| id:eqtl-a-ENSG00000120903	Inverse variance weighted	4	0.0783253	0.138073	0.570528	-0.192298	0.348949	1.08147	0.825061	1.41758
704	eqtl-a-ENSG00000120903	Lung adenocarcinoma	Lung adenocarcinoma || id:ieu-a-984	|| id:eqtl-a-ENSG00000120903	Simple mode	4	0.0556743	0.169969	0.764774	-0.277465	0.388813	1.05725	0.757702	1.47523
705	eqtl-a-ENSG00000120903	Lung adenocarcinoma	Lung adenocarcinoma || id:ieu-a-984	|| id:eqtl-a-ENSG00000120903	Weighted mode	4	-0.0845603	0.108635	0.493094	-0.297486	0.128365	0.918916	0.742683	1.13697
706	eqtl-a-ENSG00000177453	Lung adenocarcinoma	Lung adenocarcinoma || id:ieu-a-984	|| id:eqtl-a-ENSG00000177453	MR Egger	3	-0.464371	0.360654	0.420386	-1.17125	0.24251	0.628531	0.309979	1.27444
707	eqtl-a-ENSG00000177453	Lung adenocarcinoma	Lung adenocarcinoma || id:ieu-a-984	|| id:eqtl-a-ENSG00000177453	Weighted median	3	-0.0512913	0.0849877	0.546166	-0.217867	0.115284	0.950002	0.804232	1.12219
708	eqtl-a-ENSG00000177453	Lung adenocarcinoma	Lung adenocarcinoma || id:ieu-a-984	|| id:eqtl-a-ENSG00000177453	Inverse variance weighted	3	-0.0190019	0.0741431	0.797729	-0.164322	0.126319	0.981178	0.848468	1.13464
709	eqtl-a-ENSG00000177453	Lung adenocarcinoma	Lung adenocarcinoma || id:ieu-a-984	|| id:eqtl-a-ENSG00000177453	Simple mode	3	-0.0703717	0.113583	0.598724	-0.292995	0.152252	0.932047	0.746026	1.16445
710	eqtl-a-ENSG00000177453	Lung adenocarcinoma	Lung adenocarcinoma || id:ieu-a-984	|| id:eqtl-a-ENSG00000177453	Weighted mode	3	-0.0662585	0.0986731	0.571077	-0.259658	0.127141	0.935889	0.771316	1.13558
711	eqtl-a-ENSG00000111863	Lung adenocarcinoma	Lung adenocarcinoma || id:ieu-a-984	|| id:eqtl-a-ENSG00000111863	MR Egger	4	0.767597	3.08341	0.826636	-5.27589	6.81109	2.15458	0.0051134	907.856
712	eqtl-a-ENSG00000111863	Lung adenocarcinoma	Lung adenocarcinoma || id:ieu-a-984	|| id:eqtl-a-ENSG00000111863	Weighted median	4	-0.0654346	0.065386	0.316951	-0.193591	0.0627219	0.93666	0.823995	1.06473
713	eqtl-a-ENSG00000111863	Lung adenocarcinoma	Lung adenocarcinoma || id:ieu-a-984	|| id:eqtl-a-ENSG00000111863	Inverse variance weighted	4	-0.0717475	0.0750125	0.338833	-0.218772	0.0752771	0.930766	0.803505	1.07818
714	eqtl-a-ENSG00000111863	Lung adenocarcinoma	Lung adenocarcinoma || id:ieu-a-984	|| id:eqtl-a-ENSG00000111863	Simple mode	4	-0.0649894	0.125745	0.640958	-0.311449	0.181471	0.937077	0.732385	1.19898
715	eqtl-a-ENSG00000111863	Lung adenocarcinoma	Lung adenocarcinoma || id:ieu-a-984	|| id:eqtl-a-ENSG00000111863	Weighted mode	4	-0.0649894	0.0695387	0.418948	-0.201285	0.0713065	0.937077	0.817679	1.07391
716	eqtl-a-ENSG00000213088	Lung adenocarcinoma	Lung adenocarcinoma || id:ieu-a-984	|| id:eqtl-a-ENSG00000213088	MR Egger	8	0.175053	0.0658078	0.0375209	0.0460695	0.304036	1.19131	1.04715	1.35532
717	eqtl-a-ENSG00000213088	Lung adenocarcinoma	Lung adenocarcinoma || id:ieu-a-984	|| id:eqtl-a-ENSG00000213088	Weighted median	8	-0.0135643	0.0441123	0.758467	-0.100024	0.0728958	0.986527	0.904815	1.07562
718	eqtl-a-ENSG00000213088	Lung adenocarcinoma	Lung adenocarcinoma || id:ieu-a-984	|| id:eqtl-a-ENSG00000213088	Inverse variance weighted	8	-0.0176123	0.04462	0.693052	-0.105068	0.069843	0.982542	0.900264	1.07234
719	eqtl-a-ENSG00000213088	Lung adenocarcinoma	Lung adenocarcinoma || id:ieu-a-984	|| id:eqtl-a-ENSG00000213088	Simple mode	8	-0.0733966	0.0850029	0.416487	-0.240002	0.0932092	0.929232	0.786626	1.09769
720	eqtl-a-ENSG00000213088	Lung adenocarcinoma	Lung adenocarcinoma || id:ieu-a-984	|| id:eqtl-a-ENSG00000213088	Weighted mode	8	0.032474	0.0438599	0.483144	-0.0534913	0.118439	1.03301	0.947914	1.12574
721	eqtl-a-ENSG00000136929	Lung adenocarcinoma	Lung adenocarcinoma || id:ieu-a-984	|| id:eqtl-a-ENSG00000136929	MR Egger	16	0.11117	0.165777	0.513386	-0.213752	0.436093	1.11758	0.807548	1.54665
722	eqtl-a-ENSG00000136929	Lung adenocarcinoma	Lung adenocarcinoma || id:ieu-a-984	|| id:eqtl-a-ENSG00000136929	Weighted median	16	-0.0549627	0.0683693	0.421449	-0.188967	0.079041	0.94652	0.827814	1.08225
723	eqtl-a-ENSG00000136929	Lung adenocarcinoma	Lung adenocarcinoma || id:ieu-a-984	|| id:eqtl-a-ENSG00000136929	Inverse variance weighted	16	-0.0185702	0.0498379	0.709437	-0.116253	0.0791121	0.981601	0.89025	1.08233
724	eqtl-a-ENSG00000136929	Lung adenocarcinoma	Lung adenocarcinoma || id:ieu-a-984	|| id:eqtl-a-ENSG00000136929	Simple mode	16	-0.129441	0.131757	0.341473	-0.387684	0.128802	0.878587	0.678627	1.13747
725	eqtl-a-ENSG00000136929	Lung adenocarcinoma	Lung adenocarcinoma || id:ieu-a-984	|| id:eqtl-a-ENSG00000136929	Weighted mode	16	-0.134706	0.137538	0.34291	-0.40428	0.134868	0.873973	0.667457	1.14439
726	eqtl-a-ENSG00000185640	Lung adenocarcinoma	Lung adenocarcinoma || id:ieu-a-984	|| id:eqtl-a-ENSG00000185640	MR Egger	5	0.169321	0.146601	0.331744	-0.118017	0.456659	1.1845	0.888681	1.57879
727	eqtl-a-ENSG00000185640	Lung adenocarcinoma	Lung adenocarcinoma || id:ieu-a-984	|| id:eqtl-a-ENSG00000185640	Weighted median	5	0.142771	0.0706094	0.0431785	0.00437633	0.281165	1.15347	1.00439	1.32467
728	eqtl-a-ENSG00000185640	Lung adenocarcinoma	Lung adenocarcinoma || id:ieu-a-984	|| id:eqtl-a-ENSG00000185640	Inverse variance weighted	5	0.149082	0.0637038	0.0192717	0.0242224	0.273941	1.16077	1.02452	1.31514
729	eqtl-a-ENSG00000185640	Lung adenocarcinoma	Lung adenocarcinoma || id:ieu-a-984	|| id:eqtl-a-ENSG00000185640	Simple mode	5	0.121732	0.106079	0.315118	-0.0861822	0.329646	1.12945	0.917427	1.39048
730	eqtl-a-ENSG00000185640	Lung adenocarcinoma	Lung adenocarcinoma || id:ieu-a-984	|| id:eqtl-a-ENSG00000185640	Weighted mode	5	0.14154	0.0775898	0.14218	-0.0105358	0.293616	1.15205	0.98952	1.34127
731	eqtl-a-ENSG00000104918	Lung adenocarcinoma	Lung adenocarcinoma || id:ieu-a-984	|| id:eqtl-a-ENSG00000104918	MR Egger	10	-0.0582308	0.127345	0.65964	-0.307827	0.191366	0.943432	0.735042	1.2109
732	eqtl-a-ENSG00000104918	Lung adenocarcinoma	Lung adenocarcinoma || id:ieu-a-984	|| id:eqtl-a-ENSG00000104918	Weighted median	10	-0.019782	0.0837124	0.813193	-0.183858	0.144294	0.980412	0.832054	1.15522
733	eqtl-a-ENSG00000104918	Lung adenocarcinoma	Lung adenocarcinoma || id:ieu-a-984	|| id:eqtl-a-ENSG00000104918	Inverse variance weighted	10	-0.0567869	0.0631516	0.368538	-0.180564	0.0669902	0.944795	0.834799	1.06929
734	eqtl-a-ENSG00000104918	Lung adenocarcinoma	Lung adenocarcinoma || id:ieu-a-984	|| id:eqtl-a-ENSG00000104918	Simple mode	10	-0.022018	0.141159	0.879491	-0.29869	0.254654	0.978223	0.741789	1.29001
735	eqtl-a-ENSG00000104918	Lung adenocarcinoma	Lung adenocarcinoma || id:ieu-a-984	|| id:eqtl-a-ENSG00000104918	Weighted mode	10	-0.0244117	0.136292	0.861816	-0.291544	0.24272	0.975884	0.747109	1.27471
736	eqtl-a-ENSG00000162747	Lung adenocarcinoma	Lung adenocarcinoma || id:ieu-a-984	|| id:eqtl-a-ENSG00000162747	MR Egger	24	0.0457315	0.0562087	0.424592	-0.0644376	0.155901	1.04679	0.937595	1.16871
737	eqtl-a-ENSG00000162747	Lung adenocarcinoma	Lung adenocarcinoma || id:ieu-a-984	|| id:eqtl-a-ENSG00000162747	Weighted median	24	0.0416909	0.0471469	0.376548	-0.0507171	0.134099	1.04257	0.950548	1.14351
738	eqtl-a-ENSG00000162747	Lung adenocarcinoma	Lung adenocarcinoma || id:ieu-a-984	|| id:eqtl-a-ENSG00000162747	Inverse variance weighted	24	0.0364982	0.0367617	0.320792	-0.0355548	0.108551	1.03717	0.96507	1.11466
739	eqtl-a-ENSG00000162747	Lung adenocarcinoma	Lung adenocarcinoma || id:ieu-a-984	|| id:eqtl-a-ENSG00000162747	Simple mode	24	0.049578	0.0678647	0.472436	-0.0834368	0.182593	1.05083	0.919949	1.20033
740	eqtl-a-ENSG00000162747	Lung adenocarcinoma	Lung adenocarcinoma || id:ieu-a-984	|| id:eqtl-a-ENSG00000162747	Weighted mode	24	0.049578	0.051717	0.34771	-0.0517874	0.150943	1.05083	0.949531	1.16293
741	eqtl-a-ENSG00000144218	Lung adenocarcinoma	Lung adenocarcinoma || id:ieu-a-984	|| id:eqtl-a-ENSG00000144218	MR Egger	16	-0.0701932	0.0378491	0.0848423	-0.144377	0.00399112	0.932214	0.865561	1.004
742	eqtl-a-ENSG00000144218	Lung adenocarcinoma	Lung adenocarcinoma || id:ieu-a-984	|| id:eqtl-a-ENSG00000144218	Weighted median	16	-0.0466214	0.0280034	0.0959436	-0.101508	0.00826534	0.954449	0.903474	1.0083
743	eqtl-a-ENSG00000144218	Lung adenocarcinoma	Lung adenocarcinoma || id:ieu-a-984	|| id:eqtl-a-ENSG00000144218	Inverse variance weighted	16	-0.0394563	0.0220216	0.0731795	-0.0826187	0.00370602	0.961312	0.920702	1.00371
744	eqtl-a-ENSG00000144218	Lung adenocarcinoma	Lung adenocarcinoma || id:ieu-a-984	|| id:eqtl-a-ENSG00000144218	Simple mode	16	-0.0449474	0.0480546	0.364428	-0.139134	0.0492397	0.956048	0.870111	1.05047
745	eqtl-a-ENSG00000144218	Lung adenocarcinoma	Lung adenocarcinoma || id:ieu-a-984	|| id:eqtl-a-ENSG00000144218	Weighted mode	16	-0.0387575	0.0251983	0.144849	-0.0881462	0.0106311	0.961984	0.915627	1.01069
746	eqtl-a-ENSG00000133116	Lung adenocarcinoma	Lung adenocarcinoma || id:ieu-a-984	|| id:eqtl-a-ENSG00000133116	MR Egger	11	-0.0765779	0.130283	0.571131	-0.331933	0.178777	0.926281	0.717535	1.19575
747	eqtl-a-ENSG00000133116	Lung adenocarcinoma	Lung adenocarcinoma || id:ieu-a-984	|| id:eqtl-a-ENSG00000133116	Weighted median	11	-0.0302428	0.0526308	0.565547	-0.133399	0.0729136	0.97021	0.875116	1.07564
748	eqtl-a-ENSG00000133116	Lung adenocarcinoma	Lung adenocarcinoma || id:ieu-a-984	|| id:eqtl-a-ENSG00000133116	Inverse variance weighted	11	0.00183423	0.0601927	0.97569	-0.116144	0.119812	1.00184	0.890347	1.12728
749	eqtl-a-ENSG00000133116	Lung adenocarcinoma	Lung adenocarcinoma || id:ieu-a-984	|| id:eqtl-a-ENSG00000133116	Simple mode	11	0.126352	0.115929	0.30132	-0.100869	0.353574	1.13468	0.904051	1.42415
750	eqtl-a-ENSG00000133116	Lung adenocarcinoma	Lung adenocarcinoma || id:ieu-a-984	|| id:eqtl-a-ENSG00000133116	Weighted mode	11	-0.0288731	0.0561288	0.618143	-0.138886	0.0811394	0.97154	0.870328	1.08452
751	eqtl-a-ENSG00000146250	Lung adenocarcinoma	Lung adenocarcinoma || id:ieu-a-984	|| id:eqtl-a-ENSG00000146250	MR Egger	5	0.0800924	0.365037	0.840412	-0.63538	0.795564	1.08339	0.529734	2.21569
752	eqtl-a-ENSG00000146250	Lung adenocarcinoma	Lung adenocarcinoma || id:ieu-a-984	|| id:eqtl-a-ENSG00000146250	Weighted median	5	0.0792354	0.12485	0.52566	-0.16547	0.323941	1.08246	0.847495	1.38257
753	eqtl-a-ENSG00000146250	Lung adenocarcinoma	Lung adenocarcinoma || id:ieu-a-984	|| id:eqtl-a-ENSG00000146250	Inverse variance weighted	5	0.204079	0.154246	0.18581	-0.0982427	0.506401	1.22639	0.906429	1.65931
754	eqtl-a-ENSG00000146250	Lung adenocarcinoma	Lung adenocarcinoma || id:ieu-a-984	|| id:eqtl-a-ENSG00000146250	Simple mode	5	0.078044	0.148682	0.627396	-0.213372	0.36946	1.08117	0.807856	1.44695
755	eqtl-a-ENSG00000146250	Lung adenocarcinoma	Lung adenocarcinoma || id:ieu-a-984	|| id:eqtl-a-ENSG00000146250	Weighted mode	5	0.0760897	0.141624	0.619577	-0.201493	0.353672	1.07906	0.81751	1.42429
756	eqtl-a-ENSG00000110203	Lung adenocarcinoma	Lung adenocarcinoma || id:ieu-a-984	|| id:eqtl-a-ENSG00000110203	MR Egger	57	0.0421562	0.0218857	0.0592534	-0.000739652	0.0850521	1.04306	0.999261	1.08877
757	eqtl-a-ENSG00000110203	Lung adenocarcinoma	Lung adenocarcinoma || id:ieu-a-984	|| id:eqtl-a-ENSG00000110203	Weighted median	57	0.0195142	0.0189408	0.302882	-0.0176098	0.0566381	1.01971	0.982544	1.05827
758	eqtl-a-ENSG00000110203	Lung adenocarcinoma	Lung adenocarcinoma || id:ieu-a-984	|| id:eqtl-a-ENSG00000110203	Inverse variance weighted	57	0.0290792	0.0122951	0.0180252	0.00498077	0.0531777	1.02951	1.00499	1.05462
759	eqtl-a-ENSG00000110203	Lung adenocarcinoma	Lung adenocarcinoma || id:ieu-a-984	|| id:eqtl-a-ENSG00000110203	Simple mode	57	0.0151148	0.0286666	0.600094	-0.0410717	0.0713013	1.01523	0.95976	1.0739
760	eqtl-a-ENSG00000110203	Lung adenocarcinoma	Lung adenocarcinoma || id:ieu-a-984	|| id:eqtl-a-ENSG00000110203	Weighted mode	57	0.0272633	0.0155014	0.0840821	-0.00311956	0.0576461	1.02764	0.996885	1.05934
761	eqtl-a-ENSG00000164047	Lung adenocarcinoma	Lung adenocarcinoma || id:ieu-a-984	|| id:eqtl-a-ENSG00000164047	MR Egger	9	-0.265892	0.206932	0.239701	-0.671479	0.139696	0.766522	0.510952	1.14992
762	eqtl-a-ENSG00000164047	Lung adenocarcinoma	Lung adenocarcinoma || id:ieu-a-984	|| id:eqtl-a-ENSG00000164047	Weighted median	9	-0.0104548	0.0670185	0.876034	-0.141811	0.120902	0.9896	0.867785	1.12851
763	eqtl-a-ENSG00000164047	Lung adenocarcinoma	Lung adenocarcinoma || id:ieu-a-984	|| id:eqtl-a-ENSG00000164047	Inverse variance weighted	9	-0.0247625	0.0515309	0.630845	-0.125763	0.0762379	0.975542	0.881824	1.07922
764	eqtl-a-ENSG00000164047	Lung adenocarcinoma	Lung adenocarcinoma || id:ieu-a-984	|| id:eqtl-a-ENSG00000164047	Simple mode	9	-1.47e-05	0.111622	0.999898	-0.218793	0.218764	0.999985	0.803488	1.24454
765	eqtl-a-ENSG00000164047	Lung adenocarcinoma	Lung adenocarcinoma || id:ieu-a-984	|| id:eqtl-a-ENSG00000164047	Weighted mode	9	0.0148521	0.0958303	0.880673	-0.172975	0.202679	1.01496	0.841158	1.22468
766	eqtl-a-ENSG00000163710	Lung adenocarcinoma	Lung adenocarcinoma || id:ieu-a-984	|| id:eqtl-a-ENSG00000163710	MR Egger	3	0.111703	0.435682	0.84022	-0.742233	0.96564	1.11818	0.476049	2.62647
767	eqtl-a-ENSG00000163710	Lung adenocarcinoma	Lung adenocarcinoma || id:ieu-a-984	|| id:eqtl-a-ENSG00000163710	Weighted median	3	-0.0592174	0.120642	0.62353	-0.295675	0.17724	0.942502	0.744029	1.19392
768	eqtl-a-ENSG00000163710	Lung adenocarcinoma	Lung adenocarcinoma || id:ieu-a-984	|| id:eqtl-a-ENSG00000163710	Inverse variance weighted	3	-0.0873172	0.102075	0.392316	-0.287384	0.112749	0.916386	0.750224	1.11935
769	eqtl-a-ENSG00000163710	Lung adenocarcinoma	Lung adenocarcinoma || id:ieu-a-984	|| id:eqtl-a-ENSG00000163710	Simple mode	3	-0.0387278	0.147854	0.817883	-0.328522	0.251066	0.962012	0.719987	1.2854
770	eqtl-a-ENSG00000163710	Lung adenocarcinoma	Lung adenocarcinoma || id:ieu-a-984	|| id:eqtl-a-ENSG00000163710	Weighted mode	3	-0.0328981	0.147638	0.844356	-0.322269	0.256472	0.967637	0.724503	1.29236
771	eqtl-a-ENSG00000204020	Lung adenocarcinoma	Lung adenocarcinoma || id:ieu-a-984	|| id:eqtl-a-ENSG00000204020	MR Egger	21	0.0756397	0.0343203	0.040062	0.00837189	0.142908	1.07857	1.00841	1.15362
772	eqtl-a-ENSG00000204020	Lung adenocarcinoma	Lung adenocarcinoma || id:ieu-a-984	|| id:eqtl-a-ENSG00000204020	Weighted median	21	0.0513636	0.026624	0.0537035	-0.000819469	0.103547	1.05271	0.999181	1.1091
773	eqtl-a-ENSG00000204020	Lung adenocarcinoma	Lung adenocarcinoma || id:ieu-a-984	|| id:eqtl-a-ENSG00000204020	Inverse variance weighted	21	0.0363714	0.0190689	0.0564733	-0.00100369	0.0737465	1.03704	0.998997	1.07653
774	eqtl-a-ENSG00000204020	Lung adenocarcinoma	Lung adenocarcinoma || id:ieu-a-984	|| id:eqtl-a-ENSG00000204020	Simple mode	21	0.0396507	0.0364454	0.289555	-0.0317822	0.111084	1.04045	0.968718	1.11749
775	eqtl-a-ENSG00000204020	Lung adenocarcinoma	Lung adenocarcinoma || id:ieu-a-984	|| id:eqtl-a-ENSG00000204020	Weighted mode	21	0.0491616	0.0219521	0.0366467	0.0061354	0.0921878	1.05039	1.00615	1.09657
776	eqtl-a-ENSG00000115602	Lung adenocarcinoma	Lung adenocarcinoma || id:ieu-a-984	|| id:eqtl-a-ENSG00000115602	MR Egger	8	0.169613	0.0811943	0.0817135	0.0104724	0.328754	1.18485	1.01053	1.38924
777	eqtl-a-ENSG00000115602	Lung adenocarcinoma	Lung adenocarcinoma || id:ieu-a-984	|| id:eqtl-a-ENSG00000115602	Weighted median	8	0.0514051	0.0387782	0.184967	-0.0246002	0.12741	1.05275	0.9757	1.13588
778	eqtl-a-ENSG00000115602	Lung adenocarcinoma	Lung adenocarcinoma || id:ieu-a-984	|| id:eqtl-a-ENSG00000115602	Inverse variance weighted	8	0.0297715	0.0327757	0.363698	-0.0344689	0.0940119	1.03022	0.966118	1.09857
779	eqtl-a-ENSG00000115602	Lung adenocarcinoma	Lung adenocarcinoma || id:ieu-a-984	|| id:eqtl-a-ENSG00000115602	Simple mode	8	0.0350694	0.0532088	0.530913	-0.0692198	0.139359	1.03569	0.933122	1.14954
780	eqtl-a-ENSG00000115602	Lung adenocarcinoma	Lung adenocarcinoma || id:ieu-a-984	|| id:eqtl-a-ENSG00000115602	Weighted mode	8	0.0411107	0.0381797	0.317288	-0.0337216	0.115943	1.04197	0.966841	1.12293
781	eqtl-a-ENSG00000143167	Lung adenocarcinoma	Lung adenocarcinoma || id:ieu-a-984	|| id:eqtl-a-ENSG00000143167	MR Egger	6	-0.0699124	0.0923328	0.491096	-0.250885	0.11106	0.932475	0.778112	1.11746
782	eqtl-a-ENSG00000143167	Lung adenocarcinoma	Lung adenocarcinoma || id:ieu-a-984	|| id:eqtl-a-ENSG00000143167	Weighted median	6	-0.0633674	0.0671649	0.345445	-0.195011	0.0682757	0.938599	0.822826	1.07066
783	eqtl-a-ENSG00000143167	Lung adenocarcinoma	Lung adenocarcinoma || id:ieu-a-984	|| id:eqtl-a-ENSG00000143167	Inverse variance weighted	6	-0.0672721	0.0559389	0.229131	-0.176912	0.0423682	0.934941	0.837853	1.04328
784	eqtl-a-ENSG00000143167	Lung adenocarcinoma	Lung adenocarcinoma || id:ieu-a-984	|| id:eqtl-a-ENSG00000143167	Simple mode	6	-0.0964733	0.0888033	0.326891	-0.270528	0.0775812	0.908034	0.762977	1.08067
785	eqtl-a-ENSG00000143167	Lung adenocarcinoma	Lung adenocarcinoma || id:ieu-a-984	|| id:eqtl-a-ENSG00000143167	Weighted mode	6	-0.0320485	0.0700993	0.666714	-0.169443	0.105346	0.96846	0.844135	1.1111
786	eqtl-a-ENSG00000007402	Lung adenocarcinoma	Lung adenocarcinoma || id:ieu-a-984	|| id:eqtl-a-ENSG00000007402	MR Egger	12	-0.104585	0.156415	0.518863	-0.411159	0.201989	0.900698	0.662881	1.22383
787	eqtl-a-ENSG00000007402	Lung adenocarcinoma	Lung adenocarcinoma || id:ieu-a-984	|| id:eqtl-a-ENSG00000007402	Weighted median	12	-0.109159	0.0528326	0.0388169	-0.21271	-0.00560674	0.896588	0.80839	0.994409
788	eqtl-a-ENSG00000007402	Lung adenocarcinoma	Lung adenocarcinoma || id:ieu-a-984	|| id:eqtl-a-ENSG00000007402	Inverse variance weighted	12	-0.124303	0.0418074	0.00294675	-0.206246	-0.0423609	0.883112	0.813633	0.958524
789	eqtl-a-ENSG00000007402	Lung adenocarcinoma	Lung adenocarcinoma || id:ieu-a-984	|| id:eqtl-a-ENSG00000007402	Simple mode	12	-0.110961	0.0770925	0.177901	-0.262063	0.0401399	0.894973	0.769463	1.04096
790	eqtl-a-ENSG00000007402	Lung adenocarcinoma	Lung adenocarcinoma || id:ieu-a-984	|| id:eqtl-a-ENSG00000007402	Weighted mode	12	-0.109463	0.0745649	0.170101	-0.255611	0.0366837	0.896315	0.774443	1.03736
791	eqtl-a-ENSG00000157152	Lung adenocarcinoma	Lung adenocarcinoma || id:ieu-a-984	|| id:eqtl-a-ENSG00000157152	MR Egger	5	0.0911969	0.199275	0.678319	-0.299383	0.481776	1.09548	0.741276	1.61895
792	eqtl-a-ENSG00000157152	Lung adenocarcinoma	Lung adenocarcinoma || id:ieu-a-984	|| id:eqtl-a-ENSG00000157152	Weighted median	5	0.0501204	0.0531646	0.345814	-0.0540822	0.154323	1.0514	0.947354	1.16687
793	eqtl-a-ENSG00000157152	Lung adenocarcinoma	Lung adenocarcinoma || id:ieu-a-984	|| id:eqtl-a-ENSG00000157152	Inverse variance weighted	5	0.0280545	0.0686835	0.682935	-0.106565	0.162674	1.02845	0.898917	1.17665
794	eqtl-a-ENSG00000157152	Lung adenocarcinoma	Lung adenocarcinoma || id:ieu-a-984	|| id:eqtl-a-ENSG00000157152	Simple mode	5	0.0896897	0.0867121	0.35941	-0.080266	0.259645	1.09383	0.922871	1.29647
795	eqtl-a-ENSG00000157152	Lung adenocarcinoma	Lung adenocarcinoma || id:ieu-a-984	|| id:eqtl-a-ENSG00000157152	Weighted mode	5	0.0591723	0.0541892	0.336212	-0.0470385	0.165383	1.06096	0.954051	1.17985
796	eqtl-a-ENSG00000238243	Lung adenocarcinoma	Lung adenocarcinoma || id:ieu-a-984	|| id:eqtl-a-ENSG00000238243	MR Egger	18	-0.0327431	0.0397338	0.422019	-0.110621	0.0451351	0.967787	0.895278	1.04617
797	eqtl-a-ENSG00000238243	Lung adenocarcinoma	Lung adenocarcinoma || id:ieu-a-984	|| id:eqtl-a-ENSG00000238243	Weighted median	18	-0.0248608	0.0343676	0.469447	-0.0922213	0.0424997	0.975446	0.911903	1.04342
798	eqtl-a-ENSG00000238243	Lung adenocarcinoma	Lung adenocarcinoma || id:ieu-a-984	|| id:eqtl-a-ENSG00000238243	Inverse variance weighted	18	-0.0334888	0.0258802	0.195668	-0.0842141	0.0172364	0.967066	0.919234	1.01739
799	eqtl-a-ENSG00000238243	Lung adenocarcinoma	Lung adenocarcinoma || id:ieu-a-984	|| id:eqtl-a-ENSG00000238243	Simple mode	18	0.0785908	0.0862649	0.375012	-0.0904883	0.24767	1.08176	0.913485	1.28104
800	eqtl-a-ENSG00000238243	Lung adenocarcinoma	Lung adenocarcinoma || id:ieu-a-984	|| id:eqtl-a-ENSG00000238243	Weighted mode	18	-0.0101598	0.0363771	0.78339	-0.081459	0.0611393	0.989892	0.921771	1.06305
801	eqtl-a-ENSG00000175445	Lung adenocarcinoma	Lung adenocarcinoma || id:ieu-a-984	|| id:eqtl-a-ENSG00000175445	MR Egger	10	-0.00511477	0.0416227	0.90523	-0.0866953	0.0764657	0.994898	0.916956	1.07947
802	eqtl-a-ENSG00000175445	Lung adenocarcinoma	Lung adenocarcinoma || id:ieu-a-984	|| id:eqtl-a-ENSG00000175445	Weighted median	10	-0.0194196	0.024742	0.432522	-0.067914	0.0290748	0.980768	0.934341	1.0295
803	eqtl-a-ENSG00000175445	Lung adenocarcinoma	Lung adenocarcinoma || id:ieu-a-984	|| id:eqtl-a-ENSG00000175445	Inverse variance weighted	10	-0.0294718	0.0303961	0.332251	-0.0890482	0.0301046	0.970958	0.914801	1.03056
804	eqtl-a-ENSG00000175445	Lung adenocarcinoma	Lung adenocarcinoma || id:ieu-a-984	|| id:eqtl-a-ENSG00000175445	Simple mode	10	0.0200011	0.0459766	0.673788	-0.0701131	0.110115	1.0202	0.932288	1.11641
805	eqtl-a-ENSG00000175445	Lung adenocarcinoma	Lung adenocarcinoma || id:ieu-a-984	|| id:eqtl-a-ENSG00000175445	Weighted mode	10	-0.0196019	0.0217165	0.390243	-0.0621662	0.0229625	0.980589	0.939727	1.02323
806	eqtl-a-ENSG00000142973	Lung adenocarcinoma	Lung adenocarcinoma || id:ieu-a-984	|| id:eqtl-a-ENSG00000142973	MR Egger	3	-0.107186	0.534485	0.874003	-1.15478	0.940404	0.898358	0.315128	2.56102
807	eqtl-a-ENSG00000142973	Lung adenocarcinoma	Lung adenocarcinoma || id:ieu-a-984	|| id:eqtl-a-ENSG00000142973	Weighted median	3	-0.0274382	0.109951	0.802936	-0.242942	0.188065	0.972935	0.784317	1.20691
808	eqtl-a-ENSG00000142973	Lung adenocarcinoma	Lung adenocarcinoma || id:ieu-a-984	|| id:eqtl-a-ENSG00000142973	Inverse variance weighted	3	-0.0266184	0.103811	0.797633	-0.230088	0.176851	0.973733	0.794464	1.19345
809	eqtl-a-ENSG00000142973	Lung adenocarcinoma	Lung adenocarcinoma || id:ieu-a-984	|| id:eqtl-a-ENSG00000142973	Simple mode	3	-0.0190528	0.136929	0.902083	-0.287433	0.249327	0.981128	0.750187	1.28316
810	eqtl-a-ENSG00000142973	Lung adenocarcinoma	Lung adenocarcinoma || id:ieu-a-984	|| id:eqtl-a-ENSG00000142973	Weighted mode	3	-0.0331223	0.149466	0.845191	-0.326075	0.25983	0.96742	0.721751	1.29671
811	eqtl-a-ENSG00000163421	Lung adenocarcinoma	Lung adenocarcinoma || id:ieu-a-984	|| id:eqtl-a-ENSG00000163421	MR Egger	17	0.0450554	0.0387837	0.263506	-0.0309606	0.121071	1.04609	0.969514	1.12871
812	eqtl-a-ENSG00000163421	Lung adenocarcinoma	Lung adenocarcinoma || id:ieu-a-984	|| id:eqtl-a-ENSG00000163421	Weighted median	17	0.0320141	0.0331735	0.33452	-0.033006	0.0970342	1.03253	0.967533	1.1019
813	eqtl-a-ENSG00000163421	Lung adenocarcinoma	Lung adenocarcinoma || id:ieu-a-984	|| id:eqtl-a-ENSG00000163421	Inverse variance weighted	17	0.0212393	0.0264369	0.421747	-0.0305771	0.0730556	1.02147	0.969886	1.07579
814	eqtl-a-ENSG00000163421	Lung adenocarcinoma	Lung adenocarcinoma || id:ieu-a-984	|| id:eqtl-a-ENSG00000163421	Simple mode	17	-0.017846	0.0633841	0.781895	-0.142079	0.106387	0.982312	0.867553	1.11225
815	eqtl-a-ENSG00000163421	Lung adenocarcinoma	Lung adenocarcinoma || id:ieu-a-984	|| id:eqtl-a-ENSG00000163421	Weighted mode	17	0.0291062	0.0331816	0.393369	-0.0359296	0.0941421	1.02953	0.964708	1.09872
816	eqtl-a-ENSG00000188906	Lung adenocarcinoma	Lung adenocarcinoma || id:ieu-a-984	|| id:eqtl-a-ENSG00000188906	MR Egger	15	0.0297715	0.0527178	0.58187	-0.0735554	0.133098	1.03022	0.929085	1.14236
817	eqtl-a-ENSG00000188906	Lung adenocarcinoma	Lung adenocarcinoma || id:ieu-a-984	|| id:eqtl-a-ENSG00000188906	Weighted median	15	0.0712353	0.0352305	0.0431789	0.00218343	0.140287	1.07383	1.00219	1.1506
818	eqtl-a-ENSG00000188906	Lung adenocarcinoma	Lung adenocarcinoma || id:ieu-a-984	|| id:eqtl-a-ENSG00000188906	Inverse variance weighted	15	0.0360438	0.0261922	0.168782	-0.0152929	0.0873805	1.0367	0.984823	1.09131
819	eqtl-a-ENSG00000188906	Lung adenocarcinoma	Lung adenocarcinoma || id:ieu-a-984	|| id:eqtl-a-ENSG00000188906	Simple mode	15	-0.000428579	0.0585551	0.994263	-0.115197	0.114339	0.999572	0.891191	1.12113
820	eqtl-a-ENSG00000188906	Lung adenocarcinoma	Lung adenocarcinoma || id:ieu-a-984	|| id:eqtl-a-ENSG00000188906	Weighted mode	15	0.0430221	0.0369982	0.264343	-0.0294944	0.115539	1.04396	0.970936	1.12248
821	eqtl-a-ENSG00000180537	Lung adenocarcinoma	Lung adenocarcinoma || id:ieu-a-984	|| id:eqtl-a-ENSG00000180537	MR Egger	23	-0.0120293	0.0302896	0.695269	-0.0713968	0.0473382	0.988043	0.931092	1.04848
822	eqtl-a-ENSG00000180537	Lung adenocarcinoma	Lung adenocarcinoma || id:ieu-a-984	|| id:eqtl-a-ENSG00000180537	Weighted median	23	-0.0173117	0.0216481	0.423892	-0.0597419	0.0251185	0.982837	0.942008	1.02544
823	eqtl-a-ENSG00000180537	Lung adenocarcinoma	Lung adenocarcinoma || id:ieu-a-984	|| id:eqtl-a-ENSG00000180537	Inverse variance weighted	23	-0.0163129	0.0186818	0.382557	-0.0529292	0.0203035	0.983819	0.948447	1.02051
824	eqtl-a-ENSG00000180537	Lung adenocarcinoma	Lung adenocarcinoma || id:ieu-a-984	|| id:eqtl-a-ENSG00000180537	Simple mode	23	-0.0342646	0.0429141	0.433147	-0.118376	0.0498471	0.966316	0.888362	1.05111
825	eqtl-a-ENSG00000180537	Lung adenocarcinoma	Lung adenocarcinoma || id:ieu-a-984	|| id:eqtl-a-ENSG00000180537	Weighted mode	23	-0.0137069	0.0184218	0.464715	-0.0498137	0.0223998	0.986387	0.951407	1.02265
826	eqtl-a-ENSG00000133661	Lung adenocarcinoma	Lung adenocarcinoma || id:ieu-a-984	|| id:eqtl-a-ENSG00000133661	MR Egger	17	0.0190619	0.0658979	0.776339	-0.110098	0.148222	1.01924	0.895746	1.15977
827	eqtl-a-ENSG00000133661	Lung adenocarcinoma	Lung adenocarcinoma || id:ieu-a-984	|| id:eqtl-a-ENSG00000133661	Weighted median	17	-0.0550808	0.033025	0.0953449	-0.11981	0.00964813	0.946409	0.887089	1.00969
828	eqtl-a-ENSG00000133661	Lung adenocarcinoma	Lung adenocarcinoma || id:ieu-a-984	|| id:eqtl-a-ENSG00000133661	Inverse variance weighted	17	-0.0675475	0.036872	0.0669595	-0.139817	0.00472162	0.934683	0.869518	1.00473
829	eqtl-a-ENSG00000133661	Lung adenocarcinoma	Lung adenocarcinoma || id:ieu-a-984	|| id:eqtl-a-ENSG00000133661	Simple mode	17	-0.0714141	0.0700601	0.323215	-0.208732	0.0659038	0.931076	0.811613	1.06812
830	eqtl-a-ENSG00000133661	Lung adenocarcinoma	Lung adenocarcinoma || id:ieu-a-984	|| id:eqtl-a-ENSG00000133661	Weighted mode	17	-0.0602654	0.0325014	0.0822313	-0.123968	0.00343739	0.941515	0.883408	1.00344
831	eqtl-a-ENSG00000239839	Lung adenocarcinoma	Lung adenocarcinoma || id:ieu-a-984	|| id:eqtl-a-ENSG00000239839	MR Egger	8	0.0127888	0.0809688	0.87968	-0.14591	0.171488	1.01287	0.864235	1.18707
832	eqtl-a-ENSG00000239839	Lung adenocarcinoma	Lung adenocarcinoma || id:ieu-a-984	|| id:eqtl-a-ENSG00000239839	Weighted median	8	-0.0385868	0.0544422	0.478469	-0.145293	0.0681198	0.962148	0.864769	1.07049
833	eqtl-a-ENSG00000239839	Lung adenocarcinoma	Lung adenocarcinoma || id:ieu-a-984	|| id:eqtl-a-ENSG00000239839	Inverse variance weighted	8	-0.0478059	0.0449044	0.287049	-0.135818	0.0402066	0.953319	0.873001	1.04103
834	eqtl-a-ENSG00000239839	Lung adenocarcinoma	Lung adenocarcinoma || id:ieu-a-984	|| id:eqtl-a-ENSG00000239839	Simple mode	8	0.00395025	0.077614	0.96083	-0.148173	0.156074	1.00396	0.862282	1.16891
835	eqtl-a-ENSG00000239839	Lung adenocarcinoma	Lung adenocarcinoma || id:ieu-a-984	|| id:eqtl-a-ENSG00000239839	Weighted mode	8	-0.0535826	0.0570148	0.378609	-0.165332	0.0581664	0.947828	0.847613	1.05989
836	eqtl-a-ENSG00000008438	Lung adenocarcinoma	Lung adenocarcinoma || id:ieu-a-984	|| id:eqtl-a-ENSG00000008438	MR Egger	11	0.0180616	0.0839242	0.834399	-0.14643	0.182553	1.01823	0.863786	1.20028
837	eqtl-a-ENSG00000008438	Lung adenocarcinoma	Lung adenocarcinoma || id:ieu-a-984	|| id:eqtl-a-ENSG00000008438	Weighted median	11	0.0395219	0.044347	0.372824	-0.0473982	0.126442	1.04031	0.953708	1.13478
838	eqtl-a-ENSG00000008438	Lung adenocarcinoma	Lung adenocarcinoma || id:ieu-a-984	|| id:eqtl-a-ENSG00000008438	Inverse variance weighted	11	0.0149134	0.0383713	0.697528	-0.0602943	0.0901211	1.01503	0.941487	1.09431
839	eqtl-a-ENSG00000008438	Lung adenocarcinoma	Lung adenocarcinoma || id:ieu-a-984	|| id:eqtl-a-ENSG00000008438	Simple mode	11	0.0612156	0.081101	0.467769	-0.0977423	0.220173	1.06313	0.906883	1.24629
840	eqtl-a-ENSG00000008438	Lung adenocarcinoma	Lung adenocarcinoma || id:ieu-a-984	|| id:eqtl-a-ENSG00000008438	Weighted mode	11	0.0507121	0.044164	0.277584	-0.0358493	0.137274	1.05202	0.964786	1.14714
841	eqtl-a-ENSG00000168079	Lung adenocarcinoma	Lung adenocarcinoma || id:ieu-a-984	|| id:eqtl-a-ENSG00000168079	MR Egger	4	-0.670455	0.539667	0.340018	-1.7282	0.387291	0.511476	0.177604	1.47299
842	eqtl-a-ENSG00000168079	Lung adenocarcinoma	Lung adenocarcinoma || id:ieu-a-984	|| id:eqtl-a-ENSG00000168079	Weighted median	4	0.0708948	0.0525751	0.177515	-0.0321525	0.173942	1.07347	0.968359	1.18999
843	eqtl-a-ENSG00000168079	Lung adenocarcinoma	Lung adenocarcinoma || id:ieu-a-984	|| id:eqtl-a-ENSG00000168079	Inverse variance weighted	4	0.078184	0.0491464	0.111646	-0.0181429	0.174511	1.08132	0.982021	1.19066
844	eqtl-a-ENSG00000168079	Lung adenocarcinoma	Lung adenocarcinoma || id:ieu-a-984	|| id:eqtl-a-ENSG00000168079	Simple mode	4	0.0943572	0.0699486	0.270138	-0.0427422	0.231457	1.09895	0.958158	1.26043
845	eqtl-a-ENSG00000168079	Lung adenocarcinoma	Lung adenocarcinoma || id:ieu-a-984	|| id:eqtl-a-ENSG00000168079	Weighted mode	4	0.049527	0.0564973	0.445222	-0.0612078	0.160262	1.05077	0.940628	1.17382
846	eqtl-a-ENSG00000099994	Lung adenocarcinoma	Lung adenocarcinoma || id:ieu-a-984	|| id:eqtl-a-ENSG00000099994	MR Egger	8	0.0922262	0.0722262	0.248823	-0.0493371	0.23379	1.09661	0.95186	1.26338
847	eqtl-a-ENSG00000099994	Lung adenocarcinoma	Lung adenocarcinoma || id:ieu-a-984	|| id:eqtl-a-ENSG00000099994	Weighted median	8	0.0421869	0.0367012	0.250362	-0.0297474	0.114121	1.04309	0.970691	1.12089
848	eqtl-a-ENSG00000099994	Lung adenocarcinoma	Lung adenocarcinoma || id:ieu-a-984	|| id:eqtl-a-ENSG00000099994	Inverse variance weighted	8	0.0353943	0.0303702	0.243845	-0.0241313	0.0949199	1.03603	0.976158	1.09957
849	eqtl-a-ENSG00000099994	Lung adenocarcinoma	Lung adenocarcinoma || id:ieu-a-984	|| id:eqtl-a-ENSG00000099994	Simple mode	8	-0.0113373	0.0544304	0.840933	-0.118021	0.0953463	0.988727	0.888677	1.10004
850	eqtl-a-ENSG00000099994	Lung adenocarcinoma	Lung adenocarcinoma || id:ieu-a-984	|| id:eqtl-a-ENSG00000099994	Weighted mode	8	0.0379569	0.0370312	0.339474	-0.0346242	0.110538	1.03869	0.965968	1.11688
851	eqtl-a-ENSG00000133105	Lung adenocarcinoma	Lung adenocarcinoma || id:ieu-a-984	|| id:eqtl-a-ENSG00000133105	MR Egger	6	0.0648768	0.172122	0.725374	-0.272482	0.402236	1.06703	0.761487	1.49516
852	eqtl-a-ENSG00000133105	Lung adenocarcinoma	Lung adenocarcinoma || id:ieu-a-984	|| id:eqtl-a-ENSG00000133105	Weighted median	6	-0.00339953	0.0462722	0.941434	-0.094093	0.0872939	0.996606	0.910198	1.09122
853	eqtl-a-ENSG00000133105	Lung adenocarcinoma	Lung adenocarcinoma || id:ieu-a-984	|| id:eqtl-a-ENSG00000133105	Inverse variance weighted	6	0.0154428	0.0711279	0.82812	-0.123968	0.154854	1.01556	0.883408	1.16749
854	eqtl-a-ENSG00000133105	Lung adenocarcinoma	Lung adenocarcinoma || id:ieu-a-984	|| id:eqtl-a-ENSG00000133105	Simple mode	6	-0.0171828	0.0844916	0.846866	-0.182786	0.148421	0.982964	0.832946	1.16
855	eqtl-a-ENSG00000133105	Lung adenocarcinoma	Lung adenocarcinoma || id:ieu-a-984	|| id:eqtl-a-ENSG00000133105	Weighted mode	6	0.00488209	0.049688	0.925547	-0.0925064	0.102271	1.00489	0.911643	1.10768
856	eqtl-a-ENSG00000154764	Lung adenocarcinoma	Lung adenocarcinoma || id:ieu-a-984	|| id:eqtl-a-ENSG00000154764	MR Egger	4	0.0116946	0.229866	0.964049	-0.438842	0.462231	1.01176	0.644783	1.58761
857	eqtl-a-ENSG00000154764	Lung adenocarcinoma	Lung adenocarcinoma || id:ieu-a-984	|| id:eqtl-a-ENSG00000154764	Weighted median	4	0.0525992	0.0786337	0.503551	-0.101523	0.206721	1.05401	0.90346	1.22964
858	eqtl-a-ENSG00000154764	Lung adenocarcinoma	Lung adenocarcinoma || id:ieu-a-984	|| id:eqtl-a-ENSG00000154764	Inverse variance weighted	4	0.0636438	0.0720256	0.376897	-0.0775263	0.204814	1.06571	0.925403	1.2273
859	eqtl-a-ENSG00000154764	Lung adenocarcinoma	Lung adenocarcinoma || id:ieu-a-984	|| id:eqtl-a-ENSG00000154764	Simple mode	4	0.0577873	0.118241	0.658536	-0.173966	0.28954	1.05949	0.840326	1.33581
860	eqtl-a-ENSG00000154764	Lung adenocarcinoma	Lung adenocarcinoma || id:ieu-a-984	|| id:eqtl-a-ENSG00000154764	Weighted mode	4	0.0447571	0.0862707	0.639742	-0.124334	0.213848	1.04577	0.883085	1.23843
861	eqtl-a-ENSG00000162722	Lung adenocarcinoma	Lung adenocarcinoma || id:ieu-a-984	|| id:eqtl-a-ENSG00000162722	MR Egger	14	-0.0119868	0.053307	0.825869	-0.116468	0.0924949	0.988085	0.890058	1.09691
862	eqtl-a-ENSG00000162722	Lung adenocarcinoma	Lung adenocarcinoma || id:ieu-a-984	|| id:eqtl-a-ENSG00000162722	Weighted median	14	-0.0100441	0.0334867	0.76422	-0.0756781	0.0555899	0.990006	0.927115	1.05716
863	eqtl-a-ENSG00000162722	Lung adenocarcinoma	Lung adenocarcinoma || id:ieu-a-984	|| id:eqtl-a-ENSG00000162722	Inverse variance weighted	14	-0.0023609	0.0301178	0.937519	-0.0613917	0.0566699	0.997642	0.940455	1.05831
864	eqtl-a-ENSG00000162722	Lung adenocarcinoma	Lung adenocarcinoma || id:ieu-a-984	|| id:eqtl-a-ENSG00000162722	Simple mode	14	0.0233747	0.0783642	0.770202	-0.130219	0.176969	1.02365	0.877903	1.19359
865	eqtl-a-ENSG00000162722	Lung adenocarcinoma	Lung adenocarcinoma || id:ieu-a-984	|| id:eqtl-a-ENSG00000162722	Weighted mode	14	-0.00988439	0.0326253	0.766708	-0.0738299	0.0540611	0.990164	0.92883	1.05555
866	eqtl-a-ENSG00000163736	Lung adenocarcinoma	Lung adenocarcinoma || id:ieu-a-984	|| id:eqtl-a-ENSG00000163736	MR Egger	21	0.0135267	0.0311628	0.669131	-0.0475525	0.0746058	1.01362	0.95356	1.07746
867	eqtl-a-ENSG00000163736	Lung adenocarcinoma	Lung adenocarcinoma || id:ieu-a-984	|| id:eqtl-a-ENSG00000163736	Weighted median	21	0.00333189	0.0247642	0.892972	-0.0452059	0.0518697	1.00334	0.955801	1.05324
868	eqtl-a-ENSG00000163736	Lung adenocarcinoma	Lung adenocarcinoma || id:ieu-a-984	|| id:eqtl-a-ENSG00000163736	Inverse variance weighted	21	-0.0134079	0.020721	0.517587	-0.0540211	0.0272052	0.986682	0.947412	1.02758
869	eqtl-a-ENSG00000163736	Lung adenocarcinoma	Lung adenocarcinoma || id:ieu-a-984	|| id:eqtl-a-ENSG00000163736	Simple mode	21	-0.0489854	0.0562242	0.393956	-0.159185	0.0612141	0.952195	0.852839	1.06313
870	eqtl-a-ENSG00000163736	Lung adenocarcinoma	Lung adenocarcinoma || id:ieu-a-984	|| id:eqtl-a-ENSG00000163736	Weighted mode	21	-0.00201196	0.0243202	0.93489	-0.0496795	0.0456556	0.99799	0.951534	1.04671
871	eqtl-a-ENSG00000124205	Lung adenocarcinoma	Lung adenocarcinoma || id:ieu-a-984	|| id:eqtl-a-ENSG00000124205	MR Egger	3	-0.0780873	0.0838005	0.522457	-0.242336	0.0861616	0.924884	0.784792	1.08998
872	eqtl-a-ENSG00000124205	Lung adenocarcinoma	Lung adenocarcinoma || id:ieu-a-984	|| id:eqtl-a-ENSG00000124205	Weighted median	3	-0.0109712	0.0462378	0.812441	-0.101597	0.0796549	0.989089	0.903393	1.08291
873	eqtl-a-ENSG00000124205	Lung adenocarcinoma	Lung adenocarcinoma || id:ieu-a-984	|| id:eqtl-a-ENSG00000124205	Inverse variance weighted	3	-0.000476918	0.0480163	0.992075	-0.0945888	0.093635	0.999523	0.909747	1.09816
874	eqtl-a-ENSG00000124205	Lung adenocarcinoma	Lung adenocarcinoma || id:ieu-a-984	|| id:eqtl-a-ENSG00000124205	Simple mode	3	0.0220363	0.123289	0.874611	-0.21961	0.263683	1.02228	0.802832	1.30172
875	eqtl-a-ENSG00000124205	Lung adenocarcinoma	Lung adenocarcinoma || id:ieu-a-984	|| id:eqtl-a-ENSG00000124205	Weighted mode	3	-0.0140382	0.0486032	0.799896	-0.1093	0.0812241	0.98606	0.896461	1.08461
876	eqtl-a-ENSG00000130656	Lung adenocarcinoma	Lung adenocarcinoma || id:ieu-a-984	|| id:eqtl-a-ENSG00000130656	MR Egger	18	0.0533386	0.0353088	0.150378	-0.0158666	0.122544	1.05479	0.984259	1.13037
877	eqtl-a-ENSG00000130656	Lung adenocarcinoma	Lung adenocarcinoma || id:ieu-a-984	|| id:eqtl-a-ENSG00000130656	Weighted median	18	0.0233524	0.0330481	0.479803	-0.0414219	0.0881267	1.02363	0.959424	1.09213
878	eqtl-a-ENSG00000130656	Lung adenocarcinoma	Lung adenocarcinoma || id:ieu-a-984	|| id:eqtl-a-ENSG00000130656	Inverse variance weighted	18	0.0199499	0.0254875	0.433785	-0.0300056	0.0699053	1.02015	0.97044	1.07241
879	eqtl-a-ENSG00000130656	Lung adenocarcinoma	Lung adenocarcinoma || id:ieu-a-984	|| id:eqtl-a-ENSG00000130656	Simple mode	18	-0.0468983	0.0616636	0.457345	-0.167759	0.0739623	0.954184	0.845558	1.07677
880	eqtl-a-ENSG00000130656	Lung adenocarcinoma	Lung adenocarcinoma || id:ieu-a-984	|| id:eqtl-a-ENSG00000130656	Weighted mode	18	0.0201656	0.0334034	0.554014	-0.045305	0.0856362	1.02037	0.955706	1.08941
881	eqtl-a-ENSG00000124469	Lung adenocarcinoma	Lung adenocarcinoma || id:ieu-a-984	|| id:eqtl-a-ENSG00000124469	MR Egger	9	0.0117405	0.124662	0.927606	-0.232596	0.256077	1.01181	0.792473	1.29185
882	eqtl-a-ENSG00000124469	Lung adenocarcinoma	Lung adenocarcinoma || id:ieu-a-984	|| id:eqtl-a-ENSG00000124469	Weighted median	9	-0.00288817	0.0526696	0.956269	-0.106121	0.100344	0.997116	0.899316	1.10555
883	eqtl-a-ENSG00000124469	Lung adenocarcinoma	Lung adenocarcinoma || id:ieu-a-984	|| id:eqtl-a-ENSG00000124469	Inverse variance weighted	9	-0.0218077	0.0458829	0.63458	-0.111738	0.0681227	0.978428	0.894278	1.0705
884	eqtl-a-ENSG00000124469	Lung adenocarcinoma	Lung adenocarcinoma || id:ieu-a-984	|| id:eqtl-a-ENSG00000124469	Simple mode	9	0.0483423	0.0660706	0.485245	-0.0811562	0.177841	1.04953	0.92205	1.19463
885	eqtl-a-ENSG00000124469	Lung adenocarcinoma	Lung adenocarcinoma || id:ieu-a-984	|| id:eqtl-a-ENSG00000124469	Weighted mode	9	0.0166673	0.058396	0.782574	-0.0977888	0.131123	1.01681	0.90684	1.14011
MR, Mendelian randomization.
